# Supplementary material for: Differential Transcript Profiles in Cumulus-Oocyte Complexes Originating from Pre-Ovulatory Follicles of Varied Physiological Maturity in Beef Cows
Source: MDPI journal article supplement (doi:10.3390/genes12060893), 2021-06-10
Supplement: s1 [file s1]

# Differential transcript profiles in cumulus-oocyte complexes originating from pre-ovulatory follicles of varied physiological maturity in beef cows.

Sarah E. Moorey <sup>1\*</sup>, Jenna M Monnig <sup>2</sup>, Michael F. Smith <sup>2</sup>, M. Sofia Ortega <sup>2</sup>, Jonathon A. Green <sup>2</sup>, Ky G. Pohler <sup>3</sup>, G. Alan Bridges <sup>4</sup>, Susanta K. Behura <sup>2</sup>, and Thomas W. Geary <sup>5</sup>

<sup>1</sup>University of Tennessee, Knoxville, TN, USA, <sup>2</sup>University of Missouri, Columbia, MO, USA, <sup>3</sup>Texas A&M University, College Station, TX, USA,

<sup>4</sup>University of Minnesota, St. Paul, MN, USA, <sup>5</sup>USDA-ARS Fort Keogh Livestock and Range Research Lab, Miles City, MT, USA

\*Correspondence: smoorey5 at utk.edu

For questions, please contact Sarah Moorey (*smoorey5 at utk.edu*).

## Load the Required Libraries

---

```
library('edgeR')
library("DESeq2")
library("doParallel")
library("bigmemory")
library("gtools")
library("permutations")
library("statmod")
```

## Analysis of Cumulus Cells

---

### Load and organize the count data

```
CC_counts=read.csv(file.choose())
CC <- CC_counts[,-1]
rownames(CC) <- CC_counts[,1]
```

### Filter to remove lowly expressed transcripts

```
keep <- rowSums( cpm(CC) > 5 ) >= 5
CC<-CC[keep,]
```

## DEG Small vs Large CC

---

### edgeR

```
colnames(CC)
group<-factor(c("Small","Small", "Small", "Small", "Small", "Small", "Large", "Large", "Large",
"Large", "Large", "Large", "Spont", "Spont", "Spont", "Spont", "Spont" ), levels=c("Small",
"Large", "Spont"))
design<-model.matrix(~group)
dds<-DGEList(count=CC, group=group)
dds<-estimateDisp(dds, design, robust=TRUE)
dds<-glmFit(dds, design)
dds<-glmLRT(dds,coef="groupLarge")
res_small_large_edgeR<-topTags(dds,n=Inf)$table
```

## DESeq2

```
design<-model.matrix(~group)
colData<-data.frame("group"=group)
rownames(colData)<-colnames(CC)
dds<-DESeqDataSetFromMatrix(countData=CC, colData=colData, design= ~group)
dds<-DESeq(dds)
res_small_large_DeSeq<-results(dds, contrast=c("group","Small","Large"),
pAdjustMethod="fdr", tidy=TRUE)
res_small_large_DeSeq<-res_small_large_DeSeq[with(res_small_large_DeSeq, order(pvalue)), ]
```

## Merge results for edgeR and DESeq2

```
merged_res_small_large<-merge(res_small_large_edgeR, res_small_large_DeSeq,
by.x="row.names", by.y="row")
merged_res_small_large<-merged_res_small_large[merged_res_small_large$PValue<=0.01 &
merged_res_small_large$pvalue<=0.01,]
merged_res_small_large<-merged_res_small_large[with(merged_res_small_large,
order(PValue)),]
```

## Calculate eFDR; this code should only be run on a multi-core server

### Build permutation matrix

```
perm_without_replacement <- function(n, r){
  return(factorial(n)/factorial(n - r))
  perm_without_replacement(17,17)}

permutation_matrix<-matrix(,nrow=200000,ncol=17)

for (i in seq(1:200000)){
  sampling <- sample(1:17,17, replace = FALSE)
  if ( ! identical(sampling , c(1:17))){
    permutation_matrix[i,<-sample(1:17,17, replace = FALSE) ]}

permutation_matrix<-permutation_matrix[!duplicated(permutation_matrix),]
permutation_matrix<-permutation_matrix[sample(1:200000 , 10000),]

rand<-dim(permutation_matrix)[1]

sequence.pvalue<-seq(0.005, 0.05, 0.005)

results <- filebacked.big.matrix(length(sequence.pvalue),rand, type="double", init=0,
separated=FALSE, backingfile="incidence_matrix.bin", descriptor="incidence_matrix.desc")
mdesc_result<- describe(results)
```

### Calculate eFDR for edgeR

```
no_cores <- detectCores() - 1
cl <- makeCluster(no_cores)
registerDoParallel(cl)

results[,]<-foreach(i = sequence.pvalue, .combine='rbind', .inorder=TRUE,
.packages=c("edgeR", "bigmemory"), .verbose=TRUE) %::%

  foreach(j = 1:rand, .combine='cbind', .inorder=FALSE, .packages=c("edgeR", "bigmemory"),
.verbose=TRUE) %dopar% {
    group<-c("Small", "Small", "Small", "Small", "Small",
"Small", "Large", "Large", "Large", "Large", "Large", "Large", "Spont", "Spont", "Spont",
"Spont", "Spont")
    group<-group[permutation_matrix[j,]]
    group<-factor(group, levels=c("Small", "Large", "Spont"))
    design <- model.matrix(~group)
    dds<-DGEList(count=CC, group=group)
    dds<-estimateDisp(dds, design, robust=TRUE)
    dds <- glmFit(dds, design)
    dds<-glmLRT(dds,coef="groupLarge")
    length(which(topTags(dds,n=Inf)$table$PValue <= i)) }

stopCluster(cl)
total.rand <- rand * dim(CC)[1]
qvalue<-data.frame(raw.pvalue = sequence.pvalue,
  e.pvalue.edgeR= (rowSums(results[,]+1))/(total.rand+1),
  e.pvalue.edgeR.round= round((rowSums(results[,]+1))/(total.rand+1) ,4))

rm(results)
system("rm incidence_matrix.bin")
system("rm incidence_matrix.desc")
```

### Calculate eFDR for DESeq2

```
results.rand <- filebacked.big.matrix(length(sequence.pvalue),rand, type="double", init=0,
separated=FALSE, backingfile="incidence_matrix.bin", descriptor="incidence_matrix.desc")
mdesc_result<- describe(results.rand)

no_cores <- detectCores() - 1
cl <- makeCluster(no_cores)
registerDoParallel(cl)

results.rand[,]<-foreach(i = sequence.pvalue, .combine='rbind', .inorder=TRUE,
.packages=c("DESeq2", "bigmemory"), .verbose=TRUE) %::%
```

```

foreach(j = 1:rand, .combine='cbind', .inorder=FALSE,.packages=c("DESeq2","bigmemory"),
.verbose=TRUE ) %dopar% {
  group<-c("Small","Small","Small","Small","Small","Small","Large","Large","Large","Large",
  "Large","Large","Spont","Spont","Spont","Spont","Spont")
  group<-group[permutation_matrix[j,]]
  group<-factor(group, levels=c("Small","Large","Spont"))
  design <- model.matrix(~group)
  colData<-data.frame("group"=group)
  rownames(colData)<-colnames(CC)
  dds<-DESeqDataSetFromMatrix(countData=CC, colData=colData, design= ~group)
  dds <- DESeq(dds)
  dds<- results(dds, contrast=c("group","Small","Large"), pAdjustMethod="fdr",
  tidy=TRUE)
  length(which(dds$pvalue <= i)) }

stopCluster(cl)

results.rand[1:5,1:5]
total.rand <- rand * dim(CC)[1]

qvalue2<-data.frame(raw.pvalue = sequence.pvalue,
  e.pvalue.DESEQ2= (rowSums(results.rand[,]+1))/(total.rand+1),
  e.pvalue.DESEQ2.round= round((rowSums(results.rand[,]+1))/(total.rand+1) ,4))

qvalue3<-cbind(qvalue,qvalue2)

rm(results.rand)
system("rm incidence_matrix.bin")
system("rm incidence_matrix.desc")

```

---

### DEG Small vs Spontaneous CC

---

#### edgeR

```

group<-factor(c("Small","Small","Small","Small","Small","Small","Large","Large","Large",
"Large","Large","Large","Spont","Spont","Spont","Spont","Spont"), levels=c("Small",
"Large","Spont"))
design<-model.matrix(~group)
dds<-DGEList(count=CC, group=group)
dds<-estimateDisp(dds, design, robust=TRUE)
dds<-glmFit(dds, design)
dds<-glmLRT(dds,coef="groupSpont")
res_small_spont_edgeR<-topTags(dds,n=Inf)$table

```

#### DESeq2

```

design<-model.matrix(~group)

```

```
colData<-data.frame("group"=group)
rownames(colData)<-colnames(CC)
dds<-DESeqDataSetFromMatrix(countData=CC, colData=colData, design= ~group)
dds<-DESeq(dds)
res_small_spont_DeSeq<-results(dds, contrast=c("group","Small","Spont"),
pAdjustMethod="fdr", tidy=TRUE)
res_small_spont_DeSeq<-res_small_spont_DeSeq[with(res_small_spont_DeSeq,
order(pvalue)), ]
```

### **Merge results for edgeR and DESeq2**

```
merged_res_small_spont<-merge(res_small_spont_edgeR, res_small_spont_DeSeq,
by.x="row.names", by.y="row")
merged_res_small_spont<-merged_res_small_spont[merged_res_small_spont$PValue<=0.01
& merged_res_small_spont$pvalue<=0.01,]
merged_res_small_spont<-merged_res_small_spont[with(merged_res_small_spont,
order(PValue)), ]
```

### **Calculate eFDR; this code should only be run on a multi-core server**

#### **Build permutation matrix**

```
perm_without_replacement <- function(n, r){
  return(factorial(n)/factorial(n - r))
  perm_without_replacement(17,17)}

permutation_matrix<-matrix(,nrow=200000,ncol=17)

for (i in seq(1:200000)){
  sampling <- sample(1:17,17, replace = FALSE)
  if ( ! identical(sampling , c(1:17))){
    permutation_matrix[i,]<-sample(1:17,17, replace = FALSE) }}

permutation_matrix<-permutation_matrix[!duplicated(permutation_matrix),]
permutation_matrix<-permutation_matrix[sample(1:200000 , 10000),]

rand<-dim(permutation_matrix)[1]

sequence.pvalue<-seq(0.005, 0.05, 0.005)

results <- filebacked.big.matrix(length(sequence.pvalue),rand, type="double", init=0,
separated=FALSE, backingfile="incidence_matrix.bin", descriptor="incidence_matrix.desc")
mdesc_result<- describe(results)
```

#### **Calculate eFDR for edgeR**

```
no_cores <- detectCores() - 1
```

```

cl <- makeCluster(no_cores)
registerDoParallel(cl)

results[,]<-foreach(i = sequence.pvalue, .combine='rbind', .inorder=TRUE,
.packages=c("edgeR", "bigmemory"), .verbose=TRUE) %:%

foreach(j = 1:rand, .combine='cbind', .inorder=FALSE, .packages=c("edgeR", "bigmemory"),
.verbose=TRUE ) %dopar% {
  group<-c("Small", "Small", "Small", "Small", "Small",
"Small", "Large", "Large", "Large", "Large", "Large", "Large", "Spont", "Spont", "Spont",
"Spont", "Spont")
  group<-group[permutation_matrix[j,]]
  group<-factor(group, levels=c("Small", "Large", "Spont"))
  design <- model.matrix(~group)
  dds<-DGEList(count=CC, group=group)
  dds<-estimateDisp(dds, design, robust=TRUE)
  dds <- glmFit(dds, design)
  dds<-glmLRT(dds,coef="groupSpont")
  length(which(topTags(dds,n=Inf)$table$PValue <= i)) }

stopCluster(cl)
total.rand <- rand * dim(CC)[1]
qvalue<-data.frame(raw.pvalue = sequence.pvalue,
  e.pvalue.edgeR= (rowSums(results[,]+1))/(total.rand+1),
  e.pvalue.edgeR.round= round((rowSums(results[,]+1))/(total.rand+1) ,4))

rm(results)
system("rm incidence_matrix.bin")
system("rm incidence_matrix.desc")

```

### **Calculate eFDR for DESeq2**

```

results.rand <- filebacked.big.matrix(length(sequence.pvalue),rand, type="double", init=0,
separated=FALSE, backingfile="incidence_matrix.bin", descriptor="incidence_matrix.desc")
mdesc_result<- describe(results.rand)

```

```

no_cores <- detectCores() - 1
cl <- makeCluster(no_cores)
registerDoParallel(cl)

```

```

results.rand[,]<-foreach(i = sequence.pvalue, .combine='rbind', .inorder=TRUE,
.packages=c("DESeq2", "bigmemory"), .verbose=TRUE) %:%

```

```

foreach(j = 1:rand, .combine='cbind', .inorder=FALSE, .packages=c("DESeq2", "bigmemory"),
.verbose=TRUE ) %dopar% {

```

```

group<-c("Small","Small","Small","Small","Small","Small","Large","Large","Large","Large",
,"Large","Large","Spont","Spont","Spont","Spont","Spont")
group<-group[permutation_matrix[j,]]
group<-factor(group, levels=c("Small","Large","Spont"))
design <- model.matrix(~group)
colData<-data.frame("group"=group)
rownames(colData)<-colnames(CC)
dds<-DESeqDataSetFromMatrix(countData=CC, colData=colData, design= ~group)
dds <- DESeq(dds)
dds<- results(dds, contrast=c("group","Small","Spont"), pAdjustMethod="fdr",
tidy=TRUE)
length(which(dds$pvalue <= i)) }

stopCluster(cl)

results.rand[1:5,1:5]
total.rand <- rand * dim(CC)[1]

qvalue2<-data.frame(raw.pvalue = sequence.pvalue,
                    e.pvalue.DESEQ2= (rowSums(results.rand[,]+1))/(total.rand+1),
                    e.pvalue.DESEQ2.round= round((rowSums(results.rand[,]+1))/(total.rand+1),4))

qvalue3<-cbind(qvalue,qvalue2)

rm(results.rand)
system("rm incidence_matrix.bin")
system("rm incidence_matrix.desc")

```

---

### DEG Large vs Spontaneous CC

---

#### edgeR

```

group<-factor(c("Small","Small","Small","Small","Small","Small","Large","Large","Large",
,"Large","Large","Large","Spont","Spont","Spont","Spont","Spont"), levels=c("Large",
"Small","Spont"))
design<-model.matrix(~group)
dds<-DGEList(count=CC, group=group)
dds<-estimateDisp(dds, design, robust=TRUE)
dds<-glmFit(dds, design)
dds<-glmLRT(dds,coef="groupSpont")
res_large_spont_edgeR<-topTags(dds,n=Inf)$table

```

#### DESeq2

```

design<-model.matrix(~group)
colData<-data.frame("group"=group)

```

```

rownames(colData)<-colnames(CC)
dds<-DESeqDataSetFromMatrix(countData=CC, colData=colData, design= ~group)
dds<-DESeq(dds)
res_large_spont_DeSeq<-results(dds, contrast=c("group","Large","Spont"),
pAdjustMethod="fdr", tidy=TRUE)
res_large_spont_DeSeq<-res_large_spont_DeSeq[with(res_large_spont_DeSeq, order(pvalue)),
]

```

### **Merge results for edgeR and DESeq2**

```

merged_res_large_spont<-merge(res_large_spont_edgeR, res_large_spont_DeSeq,
by.x="row.names", by.y="row")
merged_res_large_spont<-merged_res_large_spont[merged_res_large_spont$PValue<=0.01 &
merged_res_large_spont$pvalue<=0.01,]
merged_res_large_spont<-merged_res_large_spont[with(merged_res_large_spont,
order(PValue)), ]

```

### **Calculate eFDR; this code should only be run on a multi-core server**

#### **Build permutation matrix**

```

perm_without_replacement <- function(n, r){
  return(factorial(n)/factorial(n - r))
  perm_without_replacement(17,17)}

permutation_matrix<-matrix(,nrow=200000,ncol=17)

for (i in seq(1:200000)){
  sampling <- sample(1:17,17, replace = FALSE)
  if ( ! identical(sampling , c(1:17))){
    permutation_matrix[i,<-sample(1:17,17, replace = FALSE) ]}

permutation_matrix<-permutation_matrix[!duplicated(permutation_matrix),]
permutation_matrix<-permutation_matrix[sample(1:200000 , 10000),]

rand<-dim(permutation_matrix)[1]

sequence.pvalue<-seq(0.005, 0.05, 0.005)

results <- filebacked.big.matrix(length(sequence.pvalue),rand, type="double", init=0,
separated=FALSE, backingfile="incidence_matrix.bin", descriptor="incidence_matrix.desc")
mdesc_result<- describe(results)

```

#### **Calculate eFDR for edgeR**

```

no_cores <- detectCores() - 1
cl <- makeCluster(no_cores)

```



```

registerDoParallel(cl)

results[,]<-foreach(i = sequence.pvalue, .combine='rbind', .inorder=TRUE,
.packages=c("edgeR","bigmemory"), .verbose=TRUE) %::%

  foreach(j = 1:rand, .combine='cbind', .inorder=FALSE,.packages=c("edgeR","bigmemory"),
.verbose=TRUE ) %dopar% {
    group<-c("Small","Small","Small","Small","Small",
"Small","Large","Large","Large","Large", "Large", "Large", "Spont", "Spont", "Spont",
"Spont", "Spont")
    group<-group[permutation_matrix[j,]]
    group<-factor(group, levels=c("Large", "Small", "Spont"))
    design <- model.matrix(~group)
    dds<-DGEList(count=CC, group=group)
    dds<-estimateDisp(dds, design, robust=TRUE)
    dds <- glmFit(dds, design)
    dds<-glmLRT(dds,coef="groupSpont")
    length(which(topTags(dds,n=Inf)$table$PValue <= i)) }

stopCluster(cl)
total.rand <- rand * dim(CC)[1]
qvalue<-data.frame(raw.pvalue = sequence.pvalue,
  e.pvalue.edgeR= (rowSums(results[,]+1))/(total.rand+1),
  e.pvalue.edgeR.round= round((rowSums(results[,]+1))/(total.rand+1) ,4))

rm(results)
system("rm incidence_matrix.bin")
system("rm incidence_matrix.desc")

```

### Calculate eFDR for DESeq2

```

results.rand <- filebacked.big.matrix(length(sequence.pvalue),rand, type="double", init=0,
separated=FALSE, backingfile="incidence_matrix.bin", descriptor="incidence_matrix.desc")
mdesc_result<- describe(results.rand)

no_cores <- detectCores() - 1
cl <- makeCluster(no_cores)
registerDoParallel(cl)

results.rand[,]<-foreach(i = sequence.pvalue, .combine='rbind', .inorder=TRUE,
.packages=c("DESeq2","bigmemory"), .verbose=TRUE) %::%

foreach(j = 1:rand, .combine='cbind', .inorder=FALSE,.packages=c("DESeq2","bigmemory"),
.verbose=TRUE ) %dopar% {

```

```

group< c("Small","Small","Small","Small","Small","Small","Large","Large","Large","Large",
,"Large","Large","Spont","Spont","Spont","Spont","Spont","Spont")
group<-group[permutation_matrix[j,]]
group<-factor(group, levels=c("Large", "Small", "Spont"))
design <- model.matrix(~group)
colData<-data.frame("group"=group)
rownames(colData)<-colnames(CC)
dds<-DESeqDataSetFromMatrix(countData=CC, colData=colData, design= ~group)
dds <- DESeq(dds)
dds<- results(dds, contrast=c("group","Large", "Spont"), pAdjustMethod="fdr",
tidy=TRUE)
length(which(dds$pvalue <= i)) }

stopCluster(cl)

results.rand[1:5,1:5]
total.rand <- rand * dim(CC)[1]

qvalue2<-data.frame(raw.pvalue = sequence.pvalue,
                    e.pvalue.DESEQ2= (rowSums(results.rand[,]+1))/(total.rand+1),
                    e.pvalue.DESEQ2.round= round((rowSums(results.rand[,]+1))/(total.rand+1),4))

qvalue3<-cbind(qvalue,qvalue2)

rm(results.rand)
system("rm incidence_matrix.bin")
system("rm incidence_matrix.desc")

```

---

### Analysis of Oocytes

---

#### **Load the oocyte count data**

```

Oocyte_counts=read.csv(file.choose())
Oocyte <- Oocyte_counts[,-1]
rownames(Oocyte) <- Oocyte_counts[,1]

```

#### **Filter to remove lowly expressed transcripts**

```

keep <- rowSums( cpm(Oocyte) > 5 ) >= 4
Oocyte<-Oocyte[keep,]

```

---

### DEG Small vs Large Oocytes

---

## **edgeR**

```
colnames(Oocyte)
group<-factor(c("Small","Small", "Small","Small", "Small","Small", "Large", "Large","Large",
"Large", "Large", "Large", "Spont", "Spont","Spont", "Spont" ), levels=c("Small", "Large",
"Spont"))
design<-model.matrix(~group)
dds<-DGEList(count=Oocyte, group=group)
dds<-estimateDisp(dds, design, robust=TRUE)
dds<-glmFit(dds, design)
dds<-glmLRT(dds,coef="groupLarge")
res_small_large_edgeR<-topTags(dds,n=Inf)$table
```

## **DESeq2**

```
design<-model.matrix(~group)
colData<-data.frame("group"=group)
rownames(colData)<-colnames(Oocyte)
dds<-DESeqDataSetFromMatrix(countData=Oocyte, colData=colData, design= ~group)
dds<-DESeq(dds)
res_small_large_DeSeq<-results(dds, contrast=c("group","Small", "Large"),
pAdjustMethod="fdr", tidy=TRUE)
res_small_large_DeSeq<-res_small_large_DeSeq[with(res_small_large_DeSeq, order(pvalue)), ]
```

## **Merge the results for edgeR and DESeq2**

```
merged_res_small_large<-merge(res_small_large_edgeR, res_small_large_DeSeq,
by.x="row.names", by.y="row")
merged_res_small_large<-merged_res_small_large[merged_res_small_large$PValue<=0.01 &
merged_res_small_large$pvalue<=0.01,]
merged_res_small_large<-merged_res_small_large[with(merged_res_small_large,
order(PValue)), ]
```

## **Calculate eFDR; this code should only be run on a multi-core server**

### **Build permutation matrix**

```
perm_without_replacement <- function(n, r){
  return(factorial(n)/factorial(n - r))
  perm_without_replacement(16,16)}

permutation_matrix<-matrix(,nrow=200000,ncol=16)

for (i in seq(1:200000)){
  sampling <- sample(1:16,16, replace = FALSE)
  if ( ! identical(sampling , c(1:16))){
    permutation_matrix[i,]<-sample(1:16,16, replace = FALSE) }}
```

```

permutation_matrix<-permutation_matrix[!duplicated(permutation_matrix),]
permutation_matrix<-permutation_matrix[sample(1:200000 , 10000),]

rand<-dim(permutation_matrix)[1]

sequence.pvalue<-seq(0.005, 0.05, 0.005)

results <- filebacked.big.matrix(length(sequence.pvalue),rand, type="double", init=0,
separated=FALSE, backingfile="incidence_matrix.bin", descriptor="incidence_matrix.desc")
mdesc_result<- describe(results)

```

### Calculate eFDR for edgeR

```

no_cores <- detectCores() - 1
cl <- makeCluster(no_cores)
registerDoParallel(cl)

results[,]<-foreach(i = sequence.pvalue, .combine='rbind', .inorder=TRUE,
.packages=c("edgeR","bigmemory"), .verbose=TRUE) %:%

  foreach(j = 1:rand, .combine='cbind', .inorder=FALSE,.packages=c("edgeR","bigmemory"),
.verbose=TRUE ) %dopar% {
    group<-c("Small","Small","Small","Small","Small",
"Small","Large","Large","Large","Large", "Large", "Large", "Spont", "Spont", "Spont",
"Spont")
    group<-group[permutation_matrix[j,]]
    group<-factor(group, levels=c("Small", "Large", "Spont"))
    design <- model.matrix(~group)
    dds<-DGEList(count=CC, group=group)
    dds<-estimateDisp(dds, design, robust=TRUE)
    dds <- glmFit(dds, design)
    dds<-glmLRT(dds,coef="groupLarge")
    length(which(topTags(dds,n=Inf)$table$PValue <= i)) }

stopCluster(cl)
total.rand <- rand * dim(Oocyte)[1]
qvalue<-data.frame(raw.pvalue = sequence.pvalue,
  e.pvalue.edgeR= (rowSums(results[,]+1))/(total.rand+1),
  e.pvalue.edgeR.round= round((rowSums(results[,]+1))/(total.rand+1) ,4))

rm(results)
system("rm incidence_matrix.bin")
system("rm incidence_matrix.desc")

```

## Calculate eFDR for DESeq2

```
results.rand <- filebacked.big.matrix(length(sequence.pvalue),rand, type="double", init=0,  
separated=FALSE, backingfile="incidence_matrix.bin", descriptor="incidence_matrix.desc")  
mdesc_result<- describe(results.rand)
```

```
no_cores <- detectCores() - 1  
cl <- makeCluster(no_cores)  
registerDoParallel(cl)
```

```
results.rand[,]<-foreach(i = sequence.pvalue, .combine='rbind', .inorder=TRUE,  
.packages=c("DESeq2","bigmemory"), .verbose=TRUE) %: %
```

```
foreach(j = 1:rand, .combine='cbind', .inorder=FALSE,.packages=c("DESeq2","bigmemory"),  
.verbose=TRUE ) %dopar% {  
  group<-c("Small","Small","Small","Small","Small","Small","Large","Large","Large","Large"  
  ,"Large","Large","Spont","Spont","Spont","Spont")  
  group<-group[permutation_matrix[j,]]  
  group<-factor(group, levels=c("Small", "Large", "Spont"))  
  design <- model.matrix(~group)  
  colData<-data.frame("group"=group)  
  rownames(colData)<-colnames(CC)  
  dds<-DESeqDataSetFromMatrix(countData=CC, colData=colData, design= ~group)  
  dds <- DESeq(dds)  
  dds<- results(dds, contrast=c("group", "Small", "Large"), pAdjustMethod="fdr",  
  tidy=TRUE)  
  length(which(dds$pvalue <= i)) }
```

```
stopCluster(cl)
```

```
results.rand[1:5,1:5]  
total.rand <- rand * dim(Oocyte)[1]
```

```
qvalue2<-data.frame(raw.pvalue = sequence.pvalue,  
  e.pvalue.DESEQ2= (rowSums(results.rand[,]+1))/(total.rand+1),  
  e.pvalue.DESEQ2.round= round((rowSums(results.rand[,]+1))/(total.rand+1) ,4))
```

```
qvalue3<-cbind(qvalue,qvalue2)
```

```
rm(results.rand)  
system("rm incidence_matrix.bin")  
system("rm incidence_matrix.desc")
```

## DEG Small vs Spont Oocytes

---

### edgeR

```
group<-factor(c("Small","Small","Small","Small","Small","Small","Large","Large","Large",
"Large","Large","Large","Spont","Spont","Spont","Spont"), levels=c("Small","Large",
"Spont"))
design<-model.matrix(~group)
dds<-DGEList(count=Oocyte, group=group)
dds<-estimateDisp(dds, design, robust=TRUE)
dds<-glmFit(dds, design)
dds<-glmLRT(dds,coef="groupSpont")
res_small_spont_edgeR<-topTags(dds,n=Inf)$table
head(res_small_spont_edgeR,n=30)
```

### DESeq2

```
design<-model.matrix(~group)
colData<-data.frame("group"=group)
rownames(colData)<-colnames(Oocyte)
dds<-DESeqDataSetFromMatrix(countData=Oocyte, colData=colData, design= ~group)
dds<-DESeq(dds)
res_small_spont_DeSeq<-results(dds, contrast=c("group","Small","Spont"),
pAdjustMethod="fdr", tidy=TRUE)
res_small_spont_DeSeq<-res_small_spont_DeSeq[with(res_small_spont_DeSeq,
order(pvalue)), ]
head(res_small_spont_DeSeq,n=30)
```

### Merge the results for edgeR and DESeq2

```
merged_res_small_spont<-merge(res_small_spont_edgeR, res_small_spont_DeSeq,
by.x="row.names", by.y="row")
merged_res_small_spont<-merged_res_small_spont[merged_res_small_spont$PValue<=0.01
& merged_res_small_spont$pvalue<=0.01,]
dim(merged_res_small_spont) #128
head(merged_res_small_spont)
merged_res_small_spont<-merged_res_small_spont[with(merged_res_small_spont,
order(PValue)), ]
```

### Calculate eFDR; this code should only be run on a multi-core server

#### Build permutation matrix

```
perm_without_replacement <- function(n, r){
  return(factorial(n)/factorial(n - r))
  perm_without_replacement(16,16)}

permutation_matrix<-matrix(,nrow=200000,ncol=16)
```

```

for (i in seq(1:200000)){
  sampling <- sample(1:16,16, replace = FALSE)
  if ( ! identical(sampling , c(1:16))){
    permutation_matrix[i,]<-sample(1:16,16, replace = FALSE) }}

permutation_matrix<-permutation_matrix[!duplicated(permutation_matrix),]
permutation_matrix<-permutation_matrix[sample(1:200000 , 10000),]

rand<-dim(permutation_matrix)[1]

sequence.pvalue<-seq(0.005, 0.05, 0.005)

results <- filebacked.big.matrix(length(sequence.pvalue),rand, type="double", init=0,
separated=FALSE, backingfile="incidence_matrix.bin", descriptor="incidence_matrix.desc")
mdesc_result<- describe(results)

```

### Calculate eFDR for edgeR

```

no_cores <- detectCores() - 1
cl <- makeCluster(no_cores)
registerDoParallel(cl)

results[,]<-foreach(i = sequence.pvalue, .combine='rbind', .inorder=TRUE,
.packages=c("edgeR","bigmemory"), .verbose=TRUE) %:%

  foreach(j = 1:rand, .combine='cbind', .inorder=FALSE,.packages=c("edgeR","bigmemory"),
.verbose=TRUE ) %dopar% {
    group<-c("Small","Small","Small","Small","Small",
"Small","Large","Large","Large","Large", "Large", "Large", "Spont", "Spont", "Spont",
"Spont")
    group<-group[permutation_matrix[j,]]
    group<-factor(group, levels=c("Small", "Large", "Spont"))
    design <- model.matrix(~group)
    dds<-DGEList(count=CC, group=group)
    dds<-estimateDisp(dds, design, robust=TRUE)
    dds <- glmFit(dds, design)
    dds<-glmLRT(dds,coef="groupSpont")
    length(which(topTags(dds,n=Inf)$table$PValue <= i)) }

stopCluster(cl)
total.rand <- rand * dim(Oocyte)[1]
pvalue<-data.frame(raw.pvalue = sequence.pvalue,
  e.pvalue.edgeR= (rowSums(results[,]+1))/(total.rand+1),
  e.pvalue.edgeR.round= round((rowSums(results[,]+1))/(total.rand+1) ,4))

```

```
rm(results)
system("rm incidence_matrix.bin")
system("rm incidence_matrix.desc")
```

### Calculate eFDR for DESeq2

```
results.rand <- filebacked.big.matrix(length(sequence.pvalue),rand, type="double", init=0,
separated=FALSE, backingfile="incidence_matrix.bin", descriptor="incidence_matrix.desc")
mdesc_result<- describe(results.rand)
```

```
no_cores <- detectCores() - 1
cl <- makeCluster(no_cores)
registerDoParallel(cl)
```

```
results.rand[,]<-foreach(i = sequence.pvalue, .combine='rbind', .inorder=TRUE,
.packages=c("DESeq2","bigmemory"), .verbose=TRUE) %:%
```

```
foreach(j = 1:rand, .combine='cbind', .inorder=FALSE,.packages=c("DESeq2","bigmemory"),
.verbose=TRUE ) %dopar% {
  group<=c("Small","Small","Small","Small","Small","Small","Large","Large","Large","Large",
,"Large","Large","Spont","Spont","Spont","Spont")
  group<-group[permutation_matrix[j,]]
  group<-factor(group, levels=c("Small","Large","Spont"))
  design <- model.matrix(~group)
  colData<-data.frame("group"=group)
  rownames(colData)<-colnames(CC)
  dds<-DESeqDataSetFromMatrix(countData=CC, colData=colData, design= ~group)
  dds <- DESeq(dds)
  dds<- results(dds, contrast=c("group","Small","Spont"), pAdjustMethod="fdr",
tidy=TRUE)
  length(which(dds$pvalue <= i)) }
```

```
stopCluster(cl)
```

```
results.rand[1:5,1:5]
total.rand <- rand * dim(Oocyte)[1]
```

```
qvalue2<-data.frame(raw.pvalue = sequence.pvalue,
  e.pvalue.DESEQ2= (rowSums(results.rand[,])+1)/(total.rand+1),
  e.pvalue.DESEQ2.round= round((rowSums(results.rand[,])+1)/(total.rand+1),4))
```

```
qvalue3<-cbind(qvalue,qvalue2)
```

```
rm(results.rand)
system("rm incidence_matrix.bin")
```



```
system("rm incidence_matrix.desc")
system("rm incidence_matrix.desc")
```

## DEG Large vs Spont Oocyte

---

### edgeR

```
group<-factor(c("Small","Small", "Small","Small", "Small","Small", "Large", "Large","Large",
"Large", "Large", "Large", "Spont", "Spont", "Spont","Spont" ), levels=c("Large", "Small",
"Spont"))
design<-model.matrix(~group)
dds<-DGEList(count=Oocyte, group=group)
dds<-estimateDisp(dds, design, robust=TRUE)
dds<-glmFit(dds, design)
dds<-glmLRT(dds,coef="groupSpont")
res_large_spont_edgeR<-topTags(dds,n=Inf)$table
head(res_large_spont_edgeR,n=30)
```

### DESeq2

```
design<-model.matrix(~group)
colData<-data.frame("group"=group)
rownames(colData)<-colnames(Oocyte)
dds<-DESeqDataSetFromMatrix(countData=Oocyte, colData=colData, design= ~group)
dds<-DESeq(dds)
res_large_spont_DeSeq<-results(dds, contrast=c("group","Large","Spont"),
pAdjustMethod="fdr", tidy=TRUE)
res_large_spont_DeSeq<-res_large_spont_DeSeq[with(res_large_spont_DeSeq, order(pvalue)),
]
head(res_large_spont_DeSeq,n=30)
```

### Merge the results for edgeR and DESeq2

```
merged_res_large_spont<-merge(res_large_spont_edgeR, res_large_spont_DeSeq,
by.x="row.names", by.y="row")
merged_res_large_spont<-merged_res_large_spont[merged_res_large_spont$PValue<=0.01 &
merged_res_large_spont$pvalue<=0.01,]
head(merged_res_large_spont)
merged_res_large_spont<-merged_res_large_spont[with(merged_res_large_spont,
order(PValue)), ]
```

**Calculate eFDR; this code should only be run on a multi-core server**

### Build permutation matrix

```
perm_without_replacement <- function(n, r){
  return(factorial(n)/factorial(n - r))
  perm_without_replacement(16,16)}
```

```

permutation_matrix<-matrix(nrow=200000,ncol=16)

for (i in seq(1:200000)){
  sampling <- sample(1:16,16, replace = FALSE)
  if ( ! identical(sampling , c(1:16))){
    permutation_matrix[i,]<-sample(1:16,16, replace = FALSE) }}

permutation_matrix<-permutation_matrix[!duplicated(permutation_matrix),]
permutation_matrix<-permutation_matrix[sample(1:200000 , 10000),]

rand<-dim(permutation_matrix)[1]

sequence.pvalue<-seq(0.005, 0.05, 0.005)

results <- filebacked.big.matrix(length(sequence.pvalue),rand, type="double", init=0,
separated=FALSE, backingfile="incidence_matrix.bin", descriptor="incidence_matrix.desc")
mdesc_result<- describe(results)

```

### **Calculate eFDR for edgeR**

```

no_cores <- detectCores() - 1
cl <- makeCluster(no_cores)
registerDoParallel(cl)

results[,]<-foreach(i = sequence.pvalue, .combine='rbind', .inorder=TRUE,
.packages=c("edgeR","bigmemory"), .verbose=TRUE) %:%

  foreach(j = 1:rand, .combine='cbind', .inorder=FALSE,.packages=c("edgeR","bigmemory"),
.verbose=TRUE ) %dopar% {
    group<-c("Small","Small","Small","Small","Small",
"Small","Large","Large","Large","Large", "Large", "Large", "Spont", "Spont", "Spont",
"Spont")
    group<-group[permutation_matrix[j,]]
    group<-factor(group, levels=c("Large", "Small", "Spont"))
    design <- model.matrix(~group)
    dds<-DGEList(count=CC, group=group)
    dds<-estimateDisp(dds, design, robust=TRUE)
    dds <- glmFit(dds, design)
    dds<-glmLRT(dds,coef="groupSpont")
    length(which(topTags(dds,n=Inf)$table$PValue <= i)) }

stopCluster(cl)
total.rand <- rand * dim(Oocyte)[1]
qvalue<-data.frame(raw.pvalue = sequence.pvalue,

```

```
e.pvalue.edgeR= (rowSums(results[,]+1))/(total.rand+1),
e.pvalue.edgeR.round= round((rowSums(results[,]+1))/(total.rand+1) ,4))
```

```
rm(results)
system("rm incidence_matrix.bin")
system("rm incidence_matrix.desc")
```

### Calculate eFDR for DESeq2

```
results.rand <- filebacked.big.matrix(length(sequence.pvalue),rand, type="double", init=0,
separated=FALSE, backingfile="incidence_matrix.bin", descriptor="incidence_matrix.desc")
mdesc_result<- describe(results.rand)
```

```
no_cores <- detectCores() - 1
cl <- makeCluster(no_cores)
registerDoParallel(cl)
```

```
results.rand[,]<-foreach(i = sequence.pvalue, .combine='rbind', .inorder=TRUE,
.packages=c("DESeq2","bigmemory"), .verbose=TRUE) %::%
```

```
foreach(j = 1:rand, .combine='cbind', .inorder=FALSE,.packages=c("DESeq2","bigmemory"),
.verbose=TRUE ) %dopar% {
  group< c("Small","Small","Small","Small","Small","Small","Large","Large","Large","Large",
  "Large","Large","Spont","Spont","Spont","Spont")
  group<-group[permutation_matrix[j,]]
  group<-factor(group, levels=c("Large", "Small", "Spont"))
  design <- model.matrix(~group)
  colData<-data.frame("group"=group)
  rownames(colData)<-colnames(CC)
  dds<-DESeqDataSetFromMatrix(countData=CC, colData=colData, design= ~group)
  dds <- DESeq(dds)
  dds<- results(dds, contrast=c("group", "Large", "Spont"), pAdjustMethod="fdr",
  tidy=TRUE)
  length(which(dds$pvalue <= i)) }
```

```
stopCluster(cl)
```

```
results.rand[1:5,1:5]
total.rand <- rand * dim(Oocyte)[1]
```

```
qvalue2<-data.frame(raw.pvalue = sequence.pvalue,
  e.pvalue.DESEQ2= (rowSums(results.rand[,]+1))/(total.rand+1),
  e.pvalue.DESEQ2.round= round((rowSums(results.rand[,]+1))/(total.rand+1) ,4))
```

```
qvalue3<-cbind(qvalue,qvalue2)
```

```
rm(results.rand)
system("rm incidence_matrix.bin")
system("rm incidence_matrix.desc")
system("rm incidence_matrix.desc")
```

---

### Analysis of Oocytes Minus Library Three

---

#### Re-load the oocyte count data

```
Oocyte_counts=read.csv(file.choose())
Oocyte <- Oocyte_counts[,-1]
rownames(Oocyte) <- Oocyte_counts[,1]
```

#### Remove library 3

```
Oocyte<-Oocyte[,-3]
head(Oocyte)
```

#### Filter to remove lowly expressed transcripts

```
keep <- rowSums( cpm(Oocyte) > 5 ) >= 4
Oocyte<-Oocyte[keep,]
head(Oocyte)
```

---

### DEG Small vs Large Oocyte Minus Library Three

---

#### edgeR

```
group<-factor(c("Small","Small","Small", "Small","Small", "Large", "Large","Large", "Large",
"Large", "Large", "Spont", "Spont","Spont", "Spont" ), levels=c("Small", "Large", "Spont"))
design<-model.matrix(~group)
dds<-DGEList(count=Oocyte, group=group)
dds<-estimateDisp(dds, design, robust=TRUE)
dds<-glmFit(dds, design)
dds<-glmLRT(dds,coef="groupLarge")
res_small_large_edgeR<-topTags(dds,n=Inf)$table
head(res_small_large_edgeR,n=30)
```

#### DESeq2

```
design<-model.matrix(~group)
colData<-data.frame("group"=group)
rownames(colData)<-colnames(Oocyte)
dds<-DESeqDataSetFromMatrix(countData=Oocyte, colData=colData, design= ~group)
dds<-DESeq(dds)
res_small_large_DeSeq<-results(dds, contrast=c("group","Small", "Large"),
pAdjustMethod="fdr", tidy=TRUE)
res_small_large_DeSeq<-res_small_large_DeSeq[with(res_small_large_DeSeq, order(pvalue)), ]
```

```
head(res_small_large_DeSeq,n=30)
```

### **Merge the results for edgeR and DESeq2**

```
merged_res_small_large_minus_3<-merge(res_small_large_edgeR, res_small_large_DeSeq,  
by.x="row.names", by.y="row")  
merged_res_small_large_minus_3<-  
merged_res_small_large_minus_3[merged_res_small_large_minus_3$PValue<=0.01 &  
merged_res_small_large_minus_3$pvalue<=0.01,]  
dim(merged_res_small_large_minus_3)  
head(merged_res_small_large_minus_3)  
merged_res_small_large_minus_3<-  
merged_res_small_large_minus_3[with(merged_res_small_large_minus_3, order(PValue)), ]
```

### **Merge the results for initial and validation analysis**

```
merged_res_small_large_validated<-merge(merged_res_small_large,  
merged_res_small_large_minus_3, by.x="row.names", by.y="row.names", all.x=TRUE,  
all.y=FALSE)
```

---

## **DEG Small vs Spont Oocyte Minus Library Three**

---

### **edgeR**

```
group<-factor(c("Small", "Small", "Small", "Small", "Small", "Large", "Large", "Large", "Large",  
"Large", "Large", "Spont", "Spont", "Spont", "Spont" ), levels=c("Small", "Large", "Spont"))  
design<-model.matrix(~group)  
dds<-DGEList(count=Oocyte, group=group)  
dds<-estimateDisp(dds, design, robust=TRUE)  
dds<-glmFit(dds, design)  
dds<-glmLRT(dds,coef="groupSpont")  
res_small_spont_edgeR<-topTags(dds,n=Inf)$table  
head(res_small_spont_edgeR,n=30)
```

### **DESeq2**

```
design<-model.matrix(~group)  
colData<-data.frame("group"=group)  
rownames(colData)<-colnames(Oocyte)  
dds<-DESeqDataSetFromMatrix(countData=Oocyte, colData=colData, design= ~group)  
dds<-DESeq(dds)  
res_small_spont_DeSeq<-results(dds, contrast=c("group", "Small", "Spont"),  
pAdjustMethod="fdr", tidy=TRUE)  
res_small_spont_DeSeq<-res_small_spont_DeSeq[with(res_small_spont_DeSeq,  
order(pvalue)), ]  
head(res_small_spont_DeSeq,n=30)
```

**Merge the results for edgeR and DESeq2**

```
merged_res_small_spont_minus_3<-merge(res_small_spont_edgeR, res_small_spont_DeSeq,  
by.x="row.names", by.y="row")  
merged_res_small_spont_minus_3<-  
merged_res_small_spont_minus_3[merged_res_small_spont_minus_3$PValue<=0.01 &  
merged_res_small_spont_minus_3$pvalue<=0.01,]  
dim(merged_res_small_spont_minus_3) #165  
head(merged_res_small_spont_minus_3)  
tail(merged_res_small_spont_minus_3)  
merged_res_small_spont_minus_3<-  
merged_res_small_spont_minus_3[with(merged_res_small_spont_minus_3, order(PValue)), ]
```

**Merge the results for initial and validation analysis**

```
merged_res_small_spont_validated<-merge(merged_res_small_spont,  
merged_res_small_spont_minus_3, by.x="row.names", by.y="row.names", all.x=TRUE,  
all.y=FALSE)
```
