# Supplementary material for: Differential Transcript Profiles in Cumulus-Oocyte Complexes Originating from Pre-Ovulatory Follicles of Varied Physiological Maturity in Beef Cows
Source: Genes (Basel). 2021 Jun 10;12(6):893. doi: 10.3390/genes12060893 (PMC8227736; doi:10.3390/genes12060893)
Supplement: Supplementary file 1 [file genes-12-00893-s001.zip]

Archive with 7 entries (7 files):
- Figure_S1.pdf
- File_S1.pdf
- Table_S1.xlsx
- Table_S2.xlsx
- Table_S3.xlsx
- Table_S4.xlsx
- Table_S5.xlsx
