# Supplementary material for: Differential Transcript Profiles in Cumulus-Oocyte Complexes Originating from Pre-Ovulatory Follicles of Varied Physiological Maturity in Beef Cows
Source: Genes (Basel). 2021 Jun 10;12(6):893. doi: 10.3390/genes12060893 (PMC8227736; doi:10.3390/genes12060893)
Supplement: Supplementary file 1 [file genes-12-00893-s001.zip › Table_S1.xlsx]

## Sheet: Sheet2
Table S1. Number of reads generated and aligned to the Bos taurus reference genome UMD 3.1.
library_ID	tissue_type	follicle_classification	N_reads_sequenced	N_reads_aligned	alignment_percentage
oocyte_1	oocyte_pool	small	21476029	18424285	0.8579
oocyte_2	oocyte_pool	small	24771602	21093019	0.8515
oocyte_3	oocyte_pool	small	18204273	14887454	0.8178
oocyte_4	oocyte_pool	small	21308337	18444497	0.8656
oocyte_5	oocyte_pool	small	23624716	19913273	0.8429
oocyte_6	oocyte_pool	small	20631662	17613250	0.8537
oocyte_7	oocyte_pool	large	22593129	19601799	0.8676
oocyte_8	oocyte_pool	large	24732919	21186218	0.8566
oocyte_9	oocyte_pool	large	21953205	18971960	0.8642
oocyte_10	oocyte_pool	large	22125379	18895074	0.854
oocyte_11	oocyte_pool	large	19307042	16420639	0.8505
oocyte_12	oocyte_pool	large	23541206	19732239	0.8382
oocyte_14	oocyte_pool	spontaneous	25962321	22392502	0.8625
oocyte_15	oocyte_pool	spontaneous	26860994	22496082	0.8375
oocyte_16	oocyte_pool	spontaneous	24018974	20084666	0.8362
oocyte_17	oocyte_pool	spontaneous	30900225	26852296	0.869
cumulus_1	cumulus_cell_pool	small	28346558	21290945	0.751095
cumulus_2	cumulus_cell_pool	small	32925566	24356374	0.73974
cumulus_3	cumulus_cell_pool	small	22474023	17366910	0.772755
cumulus_4	cumulus_cell_pool	small	28165356	21260405	0.754842
cumulus_5	cumulus_cell_pool	small	31742545	25421906	0.800878
cumulus_6	cumulus_cell_pool	small	25590673	20760634	0.811258
cumulus_7	cumulus_cell_pool	large	31649997	23826202	0.752803
cumulus_8	cumulus_cell_pool	large	34107117	23388470	0.685736
cumulus_9	cumulus_cell_pool	large	23733756	19046155	0.802492
cumulus_10	cumulus_cell_pool	large	26951740	21815069	0.809412
cumulus_11	cumulus_cell_pool	large	20017913	17062629	0.852368
cumulus_12	cumulus_cell_pool	large	28550996	22312898	0.78151
cumulus_13	cumulus_cell_pool	spontaneous	36300759	25836759	0.711742
cumulus_14	cumulus_cell_pool	spontaneous	34105350	26596279	0.779827
cumulus_15	cumulus_cell_pool	spontaneous	31699739	24758013	0.781016
cumulus_16	cumulus_cell_pool	spontaneous	29268474	23120594	0.789949
cumulus_17	cumulus_cell_pool	spontaneous	28058668	21736294	0.774673
oocyte library 13 was not sequenced due to low cDNA quantity.
