# Supplementary material for: Differential Transcript Profiles in Cumulus-Oocyte Complexes Originating from Pre-Ovulatory Follicles of Varied Physiological Maturity in Beef Cows
Source: Genes (Basel). 2021 Jun 10;12(6):893. doi: 10.3390/genes12060893 (PMC8227736; doi:10.3390/genes12060893)
Supplement: Supplementary file 1 [file genes-12-00893-s001.zip › Table_S2.xlsx]

## Sheet: S2a_Small_Large
Table S2a: Differentially abundant gene transcripts between small and large follicle oocyte pools.
Gene ID	DEG after validation removing library 3*	edgeR analysis		DESeq2 analysis			external gene name	description	gene biotype	mean CPM small	mean CPM large
		fold change	nominal P value	fold change	nominal P value	eFDR < 0.05
ENSBTAG00000007063	yes	-15.5371	0.000148072	-15.8418	4.97934e-05	yes	GPHA2	Bos taurus glycoprotein hormone alpha 2 (GPHA2), mRNA. [Source:RefSeq mRNA;Acc:NM_001193166]	protein_coding	14.755	0.941845
ENSBTAG00000047648	yes	-14.2652	0.00175816	-14.8127	0.0017335	yes	SYT2	synaptotagmin 2 [Source:VGNC Symbol;Acc:VGNC:35541]	protein_coding	8.2802	0.569978
ENSBTAG00000011530	yes	-11.4816	0.00542592	-11.9288	0.00874438	yes	CDH15	cadherin 15 [Source:VGNC Symbol;Acc:VGNC:27094]	protein_coding	5.12449	0.438318
ENSBTAG00000003679	yes	-9.13135	0.00762393	-9.39755	0.00790976	yes	PAAF1	Bos taurus proteasomal ATPase associated factor 1 (PAAF1), mRNA. [Source:RefSeq mRNA;Acc:NM_001075990]	protein_coding	6.89992	0.75144
ENSBTAG00000013401	yes	-8.29139	0.00409487	-8.58799	0.00324632	yes	ARHGEF40	Bos taurus Rho guanine nucleotide exchange factor (GEF) 40 (ARHGEF40), mRNA. [Source:RefSeq mRNA;Acc:NM_001205941]	protein_coding	8.84365	1.06071
ENSBTAG00000018065	yes	-7.58153	0.00176897	-7.83639	0.00108665	yes	YARS	Bos taurus tyrosyl-tRNA synthetase (YARS), mRNA. [Source:RefSeq mRNA;Acc:NM_174220]	protein_coding	8.22026	1.0743
ENSBTAG00000001830	yes	-5.77508	0.00916148	-5.91198	0.00769753	yes	LRRC46	Bos taurus leucine rich repeat containing 46 (LRRC46), mRNA. [Source:RefSeq mRNA;Acc:NM_001079799]	protein_coding	15.6411	2.70443
ENSBTAG00000019072	yes	-5.54341	0.00152387	-5.70481	0.000328983	yes	PSD4	pleckstrin and Sec7 domain containing 4 [Source:VGNC Symbol;Acc:VGNC:33433]	protein_coding	13.5881	2.44373
ENSBTAG00000015536	yes	-5.46305	0.00222244	-5.60429	0.000725584	yes	CPNE3	copine 3 [Source:VGNC Symbol;Acc:VGNC:27660]	protein_coding	11.2014	2.04094
ENSBTAG00000015117	yes	-4.73693	0.000380777	-4.95032	0.000123399	yes	GADD45GIP1	Bos taurus GADD45G interacting protein 1 (GADD45GIP1), mRNA. [Source:RefSeq mRNA;Acc:NM_001080224]	protein_coding	22.4736	4.73602
ENSBTAG00000006193	yes	-4.52584	0.00303851	-4.58247	0.0019927	yes	IRAK2	Bos taurus interleukin 1 receptor associated kinase 2 (IRAK2), mRNA. [Source:RefSeq mRNA;Acc:NM_001075696]	protein_coding	35.002	7.7274
ENSBTAG00000015334	yes	-4.38165	0.000145677	-4.47834	9.04811e-06	yes	ZHX1	Bos taurus zinc fingers and homeoboxes 1 (ZHX1), mRNA. [Source:RefSeq mRNA;Acc:NM_001110095]	protein_coding	24.7524	5.64316
ENSBTAG00000006025	yes	-4.3398	0.00321605	-4.42093	0.000325834	yes	AHSA2	Bos taurus activator of HSP90 ATPase homolog 2 (AHSA2), mRNA. [Source:RefSeq mRNA;Acc:NM_001102134]	protein_coding	9.29973	2.13568
ENSBTAG00000006555	yes	-4.23931	0.00296807	-4.3679	0.00182984	yes	ZMYM1	Bos taurus zinc finger MYM-type containing 1 (ZMYM1), mRNA. [Source:RefSeq mRNA;Acc:NM_001205509]	protein_coding	24.4893	5.7674
ENSBTAG00000046574	yes	-4.04572	0.00828252	-4.15445	0.00237218	yes	FRMPD1	FERM and PDZ domain containing 1 [Source:VGNC Symbol;Acc:VGNC:52780]	protein_coding	7.23483	1.78168
ENSBTAG00000013942	yes	-3.44534	0.00696328	-3.5303	0.0031571	yes	DAGLA	Bos taurus diacylglycerol lipase alpha (DAGLA), mRNA. [Source:RefSeq mRNA;Acc:NM_001192583]	protein_coding	20.85	6.04204
ENSBTAG00000012413	yes	-3.2301	0.000252044	-3.32826	4.82379e-05	yes	FGF12	fibroblast growth factor 12 [Source:VGNC Symbol;Acc:VGNC:53568]	protein_coding	40.0531	12.3978
ENSBTAG00000045785	yes	-2.99583	0.00225064	-3.08075	0.000615964	yes	TOM1	Bos taurus target of myb1 membrane trafficking protein (TOM1), mRNA. [Source:RefSeq mRNA;Acc:NM_001035015]	protein_coding	30.1643	10.0655
ENSBTAG00000040202	yes	-2.80591	0.0049648	-2.87322	0.00257643	yes	JY-1	Bos taurus JY-1 (LOC100126230), mRNA. [Source:RefSeq mRNA;Acc:NM_001110098]	protein_coding	32.1479	11.4555
ENSBTAG00000007084	yes	-2.49778	0.0086865	-2.549	0.00639299	yes	MAP3K14	mitogen-activated protein kinase kinase kinase 14 [Source:VGNC Symbol;Acc:VGNC:31192]	protein_coding	44.1938	17.6898
ENSBTAG00000007763	yes	-2.3285	0.00307661	-2.39246	0.00170202	yes	SLC1A4	Bos taurus solute carrier family 1 member 4 (SLC1A4), mRNA. [Source:RefSeq mRNA;Acc:NM_001081577]	protein_coding	61.2086	26.284
ENSBTAG00000000257	yes	-2.32142	0.00552133	-2.38585	0.00387633	yes	MRAP2	Bos taurus melanocortin 2 receptor accessory protein 2 (MRAP2), mRNA. [Source:RefSeq mRNA;Acc:NM_001099393]	protein_coding	50.6801	21.8209
ENSBTAG00000005408	yes	-2.23428	0.00262769	-2.27883	0.000434126	yes	CLK1	CDC like kinase 1 [Source:VGNC Symbol;Acc:VGNC:27448]	protein_coding	43.6253	19.5234
ENSBTAG00000010375	yes	-2.17057	0.00136389	-2.23269	0.000249172	yes	MSL1	male specific lethal 1 homolog [Source:VGNC Symbol;Acc:VGNC:31698]	protein_coding	57.4325	26.4613
ENSBTAG00000017866	yes	-2.16257	0.00395818	-2.2279	0.000622839	yes	CD36	Bos taurus CD36 molecule (CD36), transcript variant 1, mRNA. [Source:RefSeq mRNA;Acc:NM_001278621]	protein_coding	44.9487	20.7824
ENSBTAG00000030930	yes	-1.89878	0.0059008	-1.95824	0.0036787	yes	HMCES	5-hydroxymethylcytosine binding, ES cell specific [Source:VGNC Symbol;Acc:VGNC:29871]	protein_coding	82.3032	43.3404
ENSBTAG00000010071	yes	-1.80352	0.00421046	-1.85048	0.0015038	yes	FBXO3	F-box protein 3 [Source:VGNC Symbol;Acc:VGNC:28902]	protein_coding	82.1066	45.5379
ENSBTAG00000034069	yes	-1.76416	0.0060375	-1.80801	0.00442669	yes	MAB21L1	Bos taurus mab-21 like 1 (MAB21L1), mRNA. [Source:RefSeq mRNA;Acc:NM_001098110]	protein_coding	132.884	75.3377
ENSBTAG00000020617	yes	-1.68672	0.00204987	-1.73097	0.000686602	yes	TSC2	TSC complex subunit 2 [Source:VGNC Symbol;Acc:VGNC:36408]	protein_coding	131.679	78.0593
ENSBTAG00000013915	yes	-1.62517	0.00219921	-1.6615	0.000415361	yes	DSN1	Bos taurus DSN1 homolog, MIS12 kinetochore complex component (DSN1), mRNA. [Source:RefSeq mRNA;Acc:NM_001100323]	protein_coding	132.052	81.2449
ENSBTAG00000004059	yes	-1.49796	0.00469048	-1.54386	0.00185298	yes	SOAT1	Bos taurus sterol O-acyltransferase 1 (SOAT1), mRNA. [Source:RefSeq mRNA;Acc:NM_001034206]	protein_coding	295.885	197.521
ENSBTAG00000021214	yes	-1.36576	0.00458098	-1.40122	0.0001455	yes	FBXL5	Bos taurus F-box and leucine rich repeat protein 5 (FBXL5), mRNA. [Source:RefSeq mRNA;Acc:NM_001082440]	protein_coding	374.736	274.379
ENSBTAG00000012585	yes	1.42698	0.00625355	1.39969	0.00283573	yes	RAB3GAP2	Bos taurus RAB3 GTPase activating non-catalytic protein subunit 2 (RAB3GAP2), mRNA. [Source:RefSeq mRNA;Acc:NM_001192199]	protein_coding	170.926	243.87
ENSBTAG00000007761	yes	1.50533	0.00595113	1.46659	0.00412706	yes	ZBTB5	Bos taurus zinc finger and BTB domain containing 5 (ZBTB5), mRNA. [Source:RefSeq mRNA;Acc:NM_001077937]	protein_coding	84.8932	127.766
ENSBTAG00000012976	yes	1.57692	0.00511392	1.54221	0.00537934	yes	WLS	Bos taurus wntless Wnt ligand secretion mediator (WLS), mRNA. [Source:RefSeq mRNA;Acc:NM_001192651]	protein_coding	105.391	166.166
ENSBTAG00000001619	yes	1.62759	0.00654299	1.58995	0.00731102	yes	SERINC5	serine incorporator 5 [Source:VGNC Symbol;Acc:VGNC:34463]	protein_coding	71.226	115.906
ENSBTAG00000037935	yes	1.75877	0.00581181	1.71526	0.00161122	yes	SMARCD1	Bos taurus SWI/SNF related, matrix associated, actin dependent regulator of chromatin, subfamily d, member 1 (SMARCD1), mRNA. [Source:RefSeq mRNA;Acc:NM_001038559]	protein_coding	38.5591	67.815
ENSBTAG00000013740	yes	1.82604	0.000347546	1.78573	0.000495827	yes	SP2	Sp2 transcription factor [Source:VGNC Symbol;Acc:VGNC:35153]	protein_coding	164.658	300.754
ENSBTAG00000040422	yes	2.08296	0.00292279	2.03174	0.0027204	yes	UTP23	Bos taurus UTP23, small subunit processome component (UTP23), mRNA. [Source:RefSeq mRNA;Acc:NM_001076039]	protein_coding	35.636	74.2407
ENSBTAG00000039313	yes	2.42588	0.00396082	2.38039	0.00409045	yes	ZNF341	Bos taurus zinc finger protein 341 (ZNF341), mRNA. [Source:RefSeq mRNA;Acc:NM_001192576]	protein_coding	21.5274	52.2431
ENSBTAG00000016128	yes	2.88916	0.00169937	2.803	0.000877072	yes	GGA3	golgi associated, gamma adaptin ear containing, ARF binding protein 3 [Source:VGNC Symbol;Acc:VGNC:29337]	protein_coding	11.7856	34.1049
ENSBTAG00000018971	yes	3.09172	0.00733464	3.04073	0.00176354	yes	RAD51B	RAD51 paralog B [Source:VGNC Symbol;Acc:VGNC:33685]	protein_coding	4.36995	13.4973
ENSBTAG00000006034	yes	3.13289	0.00271337	3.09136	0.00221453	yes	RNF113A	Bos taurus ring finger protein 113A (RNF113A), mRNA. [Source:RefSeq mRNA;Acc:NM_001007807]	protein_coding	11.9617	37.4898
ENSBTAG00000015092	yes	3.22767	0.00629009	3.19182	0.00350103	yes	NOL12	nucleolar protein 12 [Source:NCBI gene;Acc:615252]	protein_coding	4.82284	15.5128
ENSBTAG00000002136	yes	3.28125	0.00929461	3.24367	0.00522312	yes	FCHO1	FCH domain only 1 [Source:VGNC Symbol;Acc:VGNC:28935]	protein_coding	5.30982	17.3969
ENSBTAG00000038228	yes	3.36354	0.00766428	3.33847	0.0053023	yes	RTL8C	retrotransposon Gag like 8C [Source:NCBI gene;Acc:615809]	protein_coding	4.69801	15.7919
ENSBTAG00000018887	yes	3.39104	0.00283498	3.33678	0.00274841	yes	IPO13	importin 13 [Source:VGNC Symbol;Acc:VGNC:30241]	protein_coding	14.3122	48.5317
ENSBTAG00000038141	yes	3.45147	0.00608905	3.37586	0.00372737	yes	ADGRG1	Bos taurus adhesion G protein-coupled receptor G1 (ADGRG1), mRNA. [Source:RefSeq mRNA;Acc:NM_001083656]	protein_coding	5.57692	19.2672
ENSBTAG00000008348	yes	3.51687	4.6645e-05	3.46191	1.49465e-05	yes	NOL4L	nucleolar protein 4 like [Source:NCBI gene;Acc:785034]	protein_coding	12.2152	42.8984
ENSBTAG00000017941	yes	3.84074	0.00258935	3.80296	0.000702306	yes	NSUN5	Bos taurus NOP2/Sun RNA methyltransferase family member 5 (NSUN5), mRNA. [Source:RefSeq mRNA;Acc:NM_001102303]	protein_coding	2.84096	10.9059
ENSBTAG00000017079	yes	3.87258	0.00159856	3.84941	0.00111748	yes	MFAP3	Bos taurus microfibril associated protein 3 (MFAP3), mRNA. [Source:RefSeq mRNA;Acc:NM_001166519]	protein_coding	7.53502	29.1138
ENSBTAG00000011414	yes	4.42399	0.0056312	4.39435	0.00447496	yes	EIF2B5	eukaryotic translation initiation factor 2B subunit epsilon [Source:VGNC Symbol;Acc:VGNC:28388]	protein_coding	2.571	11.3251
ENSBTAG00000014117	yes	4.54457	0.00465257	4.49687	0.00214868	yes	CCDC9	coiled-coil domain containing 9 [Source:VGNC Symbol;Acc:VGNC:26930]	protein_coding	2.71966	12.3796
ENSBTAG00000007308	yes	4.63016	0.00204575	4.58936	0.00142838	yes	EDC3	Bos taurus enhancer of mRNA decapping 3 (EDC3), mRNA. [Source:RefSeq mRNA;Acc:NM_001031758]	protein_coding	4.7674	22.0609
ENSBTAG00000039594	yes	4.89289	0.00391804	4.74308	0.00281109	yes	ZNF862	Bos taurus zinc finger protein 862 (ZNF862), mRNA. [Source:RefSeq mRNA;Acc:NM_001191280]	protein_coding	3.13225	15.3551
ENSBTAG00000019658	yes	5.78291	0.00096167	5.76435	0.00018897	yes	ASB16	ankyrin repeat and SOCS box containing 16 [Source:VGNC Symbol;Acc:VGNC:26193]	protein_coding	2.30901	13.395
ENSBTAG00000016309	yes	5.85113	0.0064473	5.87685	0.00517585	yes	ATP6V1D	Bos taurus ATPase H+ transporting V1 subunit D (ATP6V1D), transcript variant 2, mRNA. [Source:RefSeq mRNA;Acc:NM_001257088]	protein_coding	2.25231	13.1267
ENSBTAG00000020762	yes	8.03226	0.00178149	8.05117	0.00130199	yes	HUNK	hormonally up-regulated Neu-associated kinase [Source:VGNC Symbol;Acc:VGNC:49999]	protein_coding	1.66939	13.3008
ENSBTAG00000008347	yes	8.50662	0.000165159	8.29203	5.02112e-05	yes	MRPL48	mitochondrial ribosomal protein L48 [Source:VGNC Symbol;Acc:VGNC:31643]	protein_coding	1.48632	12.7454
ENSBTAG00000014536	yes	10.0826	0.00101833	10.0211	0.00106042	yes	SFXN1	sideroflexin 1 [Source:VGNC Symbol;Acc:VGNC:34530]	protein_coding	0.559448	5.64018
ENSBTAG00000002391	yes	10.8988	0.00161952	10.7757	0.00205702	yes	TGFB1I1	transforming growth factor beta 1 induced transcript 1 [Source:VGNC Symbol;Acc:VGNC:35801]	protein_coding	0.890257	9.75582
ENSBTAG00000009624	yes	11.3194	0.00156924	11.3139	0.000932069	yes	SGSM3	Bos taurus small G protein signaling modulator 3 (SGSM3), mRNA. [Source:RefSeq mRNA;Acc:NM_001076545]	protein_coding	1.55247	17.4902
ENSBTAG00000015504	yes	13.7348	0.000631681	13.9163	0.000585626	yes	ZNF131	Bos taurus zinc finger protein 131 (ZNF131), mRNA. [Source:RefSeq mRNA;Acc:NM_001101218]	protein_coding	0.460797	6.34919
ENSBTAG00000013550	yes	19.2901	0.000408049	18.891	0.000504774	yes	PRKCG	Bos taurus protein kinase C gamma (PRKCG), mRNA. [Source:RefSeq mRNA;Acc:NM_001166502]	protein_coding	0.423882	8.24529
ENSBTAG00000007690	yes	20.6025	6.49481e-05	20.6933	2.21077e-05	yes	AGXT2	Bos taurus alanine--glyoxylate aminotransferase 2 (AGXT2), mRNA. [Source:RefSeq mRNA;Acc:NM_001075821]	protein_coding	0.49905	10.1998
ENSBTAG00000024643	yes	23.6935	0.000114905	24.2034	0.00010409	yes	VEPH1	ventricular zone expressed PH domain containing 1 [Source:VGNC Symbol;Acc:VGNC:36787]	protein_coding	0.304382	7.53896
ENSBTAG00000009554	yes	41.1424	7.24465e-05	43.9634	0.000180186	yes	EHBP1L1	Bos taurus EH domain binding protein 1 like 1 (EHBP1L1), mRNA. [Source:RefSeq mRNA;Acc:NM_001354719]	protein_coding	0.104177	4.36233
ENSBTAG00000036028	yes	46.665	3.64513e-05	50.1116	3.22222e-05	yes	BEX2	Bos taurus brain expressed X-linked 2 (BEX2), mRNA. [Source:RefSeq mRNA;Acc:NM_001077087]	protein_coding	0.129747	6.43646
ENSBTAG00000016661	yes	52.9263	0.0013671	53.9531	0.00347311	yes	USP18	Bos taurus ubiquitin specific peptidase 18 (USP18), mRNA. [Source:RefSeq mRNA;Acc:NM_001017940]	protein_coding	0.195782	10.5191
ENSBTAG00000018873	no	-14.1929	0.00750743	-14.4532	0.00858033	yes	TTPAL	Bos taurus alpha tocopherol transfer protein like (TTPAL), mRNA. [Source:RefSeq mRNA;Acc:NM_001205931]	protein_coding	9.77129	0.68004
ENSBTAG00000010065	no	-6.32113	0.00743922	-6.47676	0.00761062	yes	TRPC5	Bos taurus transient receptor potential cation channel subfamily C member 5 (TRPC5), mRNA. [Source:RefSeq mRNA;Acc:NM_001166574]	protein_coding	5.41052	0.845948
ENSBTAG00000000746	no	-4.3107	0.0091162	-4.44263	0.00515181	yes	KAT2B	lysine acetyltransferase 2B [Source:VGNC Symbol;Acc:VGNC:30399]	protein_coding	10.8774	2.51279
ENSBTAG00000004586	no	-3.68421	0.00771033	-3.77666	0.00384002	yes	LOC107132045	UDP-N-acetylglucosamine transferase subunit ALG13 homolog [Source:NCBI gene;Acc:107132045]	protein_coding	16.578	4.49354
ENSBTAG00000039815	no	-2.23926	0.00968108	-2.30089	0.00596268	yes	ZBTB6	zinc finger and BTB domain containing 6 [Source:VGNC Symbol;Acc:VGNC:37088]	protein_coding	49.0772	21.9104
ENSBTAG00000015955	no	-2.13197	0.00911033	-2.18323	0.00321317	yes	ERGIC1	Bos taurus endoplasmic reticulum-golgi intermediate compartment 1 (ERGIC1), mRNA. [Source:RefSeq mRNA;Acc:NM_001076417]	protein_coding	41.3389	19.3826
ENSBTAG00000001949	no	1.42679	0.00955844	1.39366	0.00624512	yes	ZNF2	zinc finger protein 2 [Source:VGNC Symbol;Acc:VGNC:37221]	protein_coding	141.819	202.371
ENSBTAG00000017267	no	1.45243	0.00987423	1.42675	0.00787037	yes	COX5A	cytochrome c oxidase subunit 5A [Source:VGNC Symbol;Acc:VGNC:27636]	protein_coding	135.328	196.607
ENSBTAG00000010467	no	1.63261	0.00708277	1.59409	0.00908062	yes	SUPT5H	Bos taurus SPT5 homolog, DSIF elongation factor subunit (SUPT5H), mRNA. [Source:RefSeq mRNA;Acc:NM_001083439]	protein_coding	71.0521	115.998
ENSBTAG00000013802	no	1.86615	0.00758473	1.82023	0.00673675	yes	DAB1	DAB1, reelin adaptor protein [Source:VGNC Symbol;Acc:VGNC:27864]	protein_coding	36.9518	68.9533
ENSBTAG00000008025	no	2.06413	0.00933514	2.02544	0.00650165	yes	UBE3C	Bos taurus ubiquitin protein ligase E3C (UBE3C), mRNA. [Source:RefSeq mRNA;Acc:NM_001192188]	protein_coding	25.6522	52.9806
ENSBTAG00000038888	no	2.4484	0.00558336	2.40035	0.00337775	yes	ZBTB9	Bos taurus zinc finger and BTB domain containing 9 (ZBTB9), mRNA. [Source:RefSeq mRNA;Acc:NM_001191462]	protein_coding	15.5488	38.1012
ENSBTAG00000005974	no	3.1123	0.00582715	3.0265	0.00318074	yes	APOBEC2	apolipoprotein B mRNA editing enzyme catalytic subunit 2 [Source:VGNC Symbol;Acc:VGNC:26028]	protein_coding	4.99039	15.5608
ENSBTAG00000007623	no	3.4631	0.00418648	3.40631	0.00282687	yes	CPTP	Bos taurus ceramide-1-phosphate transfer protein (CPTP), mRNA. [Source:RefSeq mRNA;Acc:NM_001075182]	protein_coding	4.40975	15.3254
ENSBTAG00000015457	no	3.52327	0.00902681	3.44792	0.00246961	yes	FGFR1	fibroblast growth factor receptor 1 [Source:VGNC Symbol;Acc:VGNC:50179]	protein_coding	3.34482	11.7949
ENSBTAG00000001265	no	4.95657	0.00943389	4.8993	0.00813212	yes	HRG	Bos taurus histidine rich glycoprotein (HRG), mRNA. [Source:RefSeq mRNA;Acc:NM_173919]	protein_coding	1.9364	9.63828
ENSBTAG00000010163	no	5.74896	0.00927134	5.71097	0.00951104	yes	SCNN1G	Bos taurus sodium channel epithelial 1 gamma subunit (SCNN1G), mRNA. [Source:RefSeq mRNA;Acc:NM_001193174]	protein_coding	1.48089	8.55828
ENSBTAG00000013507	no	7.36429	0.00601683	7.08647	0.00674718	yes	LOC507527	Bos taurus cornifin-B-like (LOC507527), mRNA. [Source:RefSeq mRNA;Acc:NM_001034301]	protein_coding	0.979048	7.25869
* Yes indicates that the transcript appeared as a DEG on the initial analysis and the validation analysis that removed oocyte library 3. No indicates that the transcript only appeared as a deg on the initial analysis and did not pass validation. Only transcripts denoted as "yes" are reported in the manuscript.

## Sheet: S2b_Small_Spont
Table S2b: Differentially abundant gene transcripts between small and spontaneous follicle oocyte pools.
Gene ID	DEG after validation removing library 3*	edgeR analysis		DESeq2 analysis			external gene name	description	gene biotype	mean CPM small	mean CPM spontaneous
		fold change	nominal P value	fold change	nominal P value	eFDR <0.05
ENSBTAG00000017466	yes	-26.482	0.00285387	-23.4406	0.00116261	yes	HCN4	hyperpolarization activated cyclic nucleotide gated potassium channel 4 [Source:VGNC Symbol;Acc:VGNC:29779]	protein_coding	7.21458	0.259157
ENSBTAG00000000076	yes	-23.5964	0.00099229	-21.6835	0.000265212	yes	RECK	reversion inducing cysteine rich protein with kazal motifs [Source:VGNC Symbol;Acc:VGNC:33847]	protein_coding	5.76808	0.235863
ENSBTAG00000008552	yes	-11.0331	0.00563111	-12.4172	0.00244095	yes	PLXNA3	plexin A3 [Source:HGNC Symbol;Acc:HGNC:9101]	protein_coding	7.84918	0.700179
ENSBTAG00000038139	yes	-7.86278	0.0055234	-9.2498	0.00173482	yes	CERCAM	Bos taurus cerebral endothelial cell adhesion molecule (CERCAM), mRNA. [Source:RefSeq mRNA;Acc:NM_001102035]	protein_coding	12.677	1.60532
ENSBTAG00000037625	yes	-7.69738	0.00276479	-9.00924	0.00075338	yes			protein_coding	15.6763	2.03186
ENSBTAG00000011263	yes	-7.32495	0.00639389	-8.4898	0.00247349	yes	EIF6	eukaryotic translation initiation factor 6 [Source:VGNC Symbol;Acc:VGNC:57006]	protein_coding	11.5392	1.21149
ENSBTAG00000046914	yes	-6.91882	0.00740519	-8.13599	0.00225914	yes			protein_coding	8.44288	1.56674
ENSBTAG00000019072	yes	-6.17179	0.00427464	-7.21409	0.000600445	yes	PSD4	pleckstrin and Sec7 domain containing 4 [Source:VGNC Symbol;Acc:VGNC:33433]	protein_coding	13.5881	2.1904
ENSBTAG00000013942	yes	-5.80667	0.00144361	-6.68405	0.000185978	yes	DAGLA	Bos taurus diacylglycerol lipase alpha (DAGLA), mRNA. [Source:RefSeq mRNA;Acc:NM_001192583]	protein_coding	20.85	2.10264
ENSBTAG00000016433	yes	-5.41176	0.00808271	-6.08395	0.00239637	yes	FANCB	FA complementation group B [Source:VGNC Symbol;Acc:VGNC:28853]	protein_coding	11.4116	3.58056
ENSBTAG00000010247	yes	-4.71511	0.00316357	-5.23845	0.000820951	yes	FKTN	fukutin [Source:VGNC Symbol;Acc:VGNC:29030]	protein_coding	19.5748	4.13867
ENSBTAG00000021427	yes	-4.54532	0.00512313	-4.93069	0.00118874	yes	HOXB3	homeobox B3 [Source:VGNC Symbol;Acc:VGNC:29919]	protein_coding	16.9505	3.71904
ENSBTAG00000040607	yes	-3.62599	0.00820912	-3.63945	0.00274315	yes	SLA2	Bos taurus Src like adaptor 2 (SLA2), mRNA. [Source:RefSeq mRNA;Acc:NM_001035294]	protein_coding	23.3325	6.42317
ENSBTAG00000002817	yes	-3.49069	0.00880365	-3.48622	0.0041757	yes	SLC46A1	Bos taurus solute carrier family 46 member 1 (SLC46A1), mRNA. [Source:RefSeq mRNA;Acc:NM_001079585]	protein_coding	28.2197	8.06831
ENSBTAG00000006470	yes	-2.81294	0.00234101	-2.35924	0.000736404	yes	TTBK2	Bos taurus tau tubulin kinase 2 (TTBK2), mRNA. [Source:RefSeq mRNA;Acc:NM_001206071]	protein_coding	50.6963	16.6547
ENSBTAG00000005980	yes	-2.66503	0.00719069	-2.11696	0.0031852	yes	RREB1	ras responsive element binding protein 1 [Source:VGNC Symbol;Acc:VGNC:34162]	protein_coding	44.396	17.9948
ENSBTAG00000017597	yes	-2.60212	0.00877799	-2.01292	0.00236013	yes	ESCO1	establishment of sister chromatid cohesion N-acetyltransferase 1 [Source:VGNC Symbol;Acc:VGNC:28599]	protein_coding	31.0373	11.8075
ENSBTAG00000014675	yes	-2.59832	0.00774532	-2.0138	0.000928953	yes	PTCD2	pentatricopeptide repeat domain 2 [Source:VGNC Symbol;Acc:VGNC:33490]	protein_coding	30.6976	27.8271
ENSBTAG00000000387	yes	-2.5178	0.00249498	-1.91494	0.00126692	yes	NICN1	Bos taurus nicolin 1 (NICN1), mRNA. [Source:RefSeq mRNA;Acc:NM_001034767]	protein_coding	70.1067	11.9216
ENSBTAG00000046255	yes	-2.38562	0.00469068	-1.71521	0.000555774	yes	ATXN1L	Bos taurus ataxin 1 like (ATXN1L), mRNA. [Source:RefSeq mRNA;Acc:NM_001205881]	protein_coding	42.4109	17.7702
ENSBTAG00000043561	yes	-2.29919	0.000660756	-1.52146	0.00129101	yes	COX1 (mitochondrial)	cytochrome c oxidase subunit I [Source:NCBI gene (formerly Entrezgene);Acc:3283879]	protein_coding	3817.92	65.7553
ENSBTAG00000001600	yes	-2.17418	0.000903106	-1.37135	1.26934e-05	yes	DCUN1D4	defective in cullin neddylation 1 domain containing 4 [Source:VGNC Symbol;Acc:VGNC:53698]	protein_coding	60.5063	27.8028
ENSBTAG00000015158	yes	-2.11782	0.00381628	-1.2709	0.000794233	yes	INTS14	integrator complex subunit 14 [Source:VGNC Symbol;Acc:VGNC:30227]	protein_coding	58.5312	43.8841
ENSBTAG00000043563	yes	-2.08949	0.00240007	-1.19644	0.00333686	yes	ND5 (mitochondrial)	NADH dehydrogenase subunit 5 [Source:NCBI gene (formerly Entrezgene);Acc:3283887]	protein_coding	2758.39	27.6216
ENSBTAG00000018841	yes	-2.05722	0.00457405	-1.19443	0.00223579	yes	PTPN3	protein tyrosine phosphatase, non-receptor type 3 [Source:VGNC Symbol;Acc:VGNC:33538]	protein_coding	90.3487	1660.42
ENSBTAG00000034069	yes	-2.02034	0.00301313	-1.11412	0.00166256	yes	MAB21L1	Bos taurus mab-21 like 1 (MAB21L1), mRNA. [Source:RefSeq mRNA;Acc:NM_001098110]	protein_coding	132.884	45.3246
ENSBTAG00000043558	yes	-1.88378	0.00293907	-0.898508	0.00664711	yes	ND1 (mitochondrial)	NADH dehydrogenase subunit 1 [Source:NCBI gene (formerly Entrezgene);Acc:3283877]	protein_coding	3548.73	112.876
ENSBTAG00000020777	yes	-1.72375	0.00856208	-0.699916	0.00167763	yes	ERCC3	Bos taurus ERCC excision repair 3, TFIIH core complex helicase subunit (ERCC3), mRNA. [Source:RefSeq mRNA;Acc:NM_001045988]	protein_coding	78.1678	1320.14
ENSBTAG00000012352	yes	-1.62076	0.00151526	-0.54534	7.14019e-05	yes	PARP16	Bos taurus poly(ADP-ribose) polymerase family member 16 (PARP16), mRNA. [Source:RefSeq mRNA;Acc:NM_001083379]	protein_coding	183.011	72.6006
ENSBTAG00000016230	yes	-1.61489	0.00618308	-0.550953	0.000939588	yes	BRWD3	bromodomain and WD repeat domain containing 3 [Source:VGNC Symbol;Acc:VGNC:26576]	protein_coding	117.299	109.652
ENSBTAG00000000507	yes	-1.54982	0.00353458	-0.468422	0.000192602	yes	NR4A1	Bos taurus nuclear receptor subfamily 4 group A member 1 (NR4A1), mRNA. [Source:RefSeq mRNA;Acc:NM_001075911]	protein_coding	170.027	1883.63
ENSBTAG00000009099	yes	1.5533	0.00213154	1.50492	0.00270137	yes	PRR14	proline rich 14 [Source:VGNC Symbol;Acc:VGNC:33391]	protein_coding	297.585	461.969
ENSBTAG00000017177	yes	1.59186	0.00484061	1.54765	0.00285814	yes	RBM25	RNA binding motif protein 25 [Source:VGNC Symbol;Acc:VGNC:33794]	protein_coding	100.853	179.909
ENSBTAG00000013277	yes	1.62142	0.00375094	1.57922	0.00349397	yes	CCDC22	Bos taurus coiled-coil domain containing 22 (CCDC22), mRNA. [Source:RefSeq mRNA;Acc:NM_001076016]	protein_coding	110.996	147.154
ENSBTAG00000016252	yes	1.66602	0.00455481	1.6202	0.00409382	yes	LSM12	Bos taurus LSM12 homolog (LSM12), mRNA. [Source:RefSeq mRNA;Acc:NM_001076098]	protein_coding	84.0595	140.011
ENSBTAG00000010715	yes	1.67273	0.00285528	1.63276	0.00461275	yes	MRPL37	Bos taurus mitochondrial ribosomal protein L37 (MRPL37), mRNA. [Source:RefSeq mRNA;Acc:NM_001083400]	protein_coding	176.961	295.868
ENSBTAG00000025274	yes	1.68243	0.00344648	1.62846	0.00441967	yes	TUBB4B	tubulin beta 4B class IVb [Source:VGNC Symbol;Acc:VGNC:36508]	protein_coding	87.5034	176.049
ENSBTAG00000009462	yes	1.72288	0.00955974	1.67211	0.00345903	yes	MDH2	Bos taurus malate dehydrogenase 2 (MDH2), mRNA. [Source:RefSeq mRNA;Acc:NM_001013587]	protein_coding	45.2365	160.401
ENSBTAG00000004554	yes	1.79429	0.00529953	1.74326	0.00431382	yes	CAPZB	capping actin protein of muscle Z-line subunit beta [Source:VGNC Symbol;Acc:VGNC:26759]	protein_coding	56.9247	77.8966
ENSBTAG00000020560	yes	1.82803	0.00235837	1.77757	0.00208452	yes	CLPTM1	Bos taurus CLPTM1, transmembrane protein (CLPTM1), mRNA. [Source:RefSeq mRNA;Acc:NM_001046613]	protein_coding	69.85	129.824
ENSBTAG00000010467	yes	1.82829	0.00253414	1.76717	0.00434707	yes	SUPT5H	Bos taurus SPT5 homolog, DSIF elongation factor subunit (SUPT5H), mRNA. [Source:RefSeq mRNA;Acc:NM_001083439]	protein_coding	71.0521	102.076
ENSBTAG00000011287	yes	1.83798	0.00298617	1.79256	0.00511266	yes	ATXN7	ataxin 7 [Source:VGNC Symbol;Acc:VGNC:26342]	protein_coding	113.243	127.622
ENSBTAG00000020040	yes	1.84126	0.00166921	1.79172	0.00276212	yes	LPCAT4	lysophosphatidylcholine acyltransferase 4 [Source:VGNC Symbol;Acc:VGNC:30964]	protein_coding	95.6203	208.046
ENSBTAG00000018496	yes	1.99678	0.00621247	1.93638	0.00842918	yes	TIMM17B	Bos taurus translocase of inner mitochondrial membrane 17B (TIMM17B), mRNA. [Source:RefSeq mRNA;Acc:NM_001046488]	protein_coding	51.1743	71.0846
ENSBTAG00000014814	yes	2.12362	0.00144616	2.04905	0.000567598	yes	BICRAL	Bos taurus BRD4 interacting chromatin remodeling complex associated protein like (BICRAL), mRNA. [Source:RefSeq mRNA;Acc:NM_001205780]	protein_coding	33.4828	102.098
ENSBTAG00000013096	yes	2.13565	0.000366758	2.07306	0.000663459	yes	UNC119	Bos taurus unc-119 lipid binding chaperone (UNC119), mRNA. [Source:RefSeq mRNA;Acc:NM_001034645]	protein_coding	70.5152	84.911
ENSBTAG00000013283	yes	2.27613	0.00950368	2.23078	0.00699244	yes	PRR19	Bos taurus proline rich 19 (PRR19), mRNA. [Source:RefSeq mRNA;Acc:NM_001075635]	protein_coding	22.1026	150.467
ENSBTAG00000001508	yes	2.30541	0.000629775	2.24501	0.000333351	yes	SH3RF1	Bos taurus SH3 domain containing ring finger 1 (SH3RF1), mRNA. [Source:RefSeq mRNA;Acc:NM_001098065]	protein_coding	36.8266	50.3427
ENSBTAG00000038842	yes	2.43244	0.00636938	2.37032	0.00642925	yes	NEDD8	neural precursor cell expressed, developmentally down-regulated 8 [Source:NCBI gene;Acc:286796]	protein_coding	22.4739	50.2786
ENSBTAG00000019684	yes	2.44703	0.00473851	2.39196	0.00588853	yes	NUDT3	Bos taurus nudix hydrolase 3 (NUDT3), mRNA. [Source:RefSeq mRNA;Acc:NM_001082466]	protein_coding	28.656	42.5026
ENSBTAG00000003894	yes	2.50732	0.00596177	2.41932	0.00549072	yes	NDRG4	Bos taurus NDRG family member 4 (NDRG4), mRNA. [Source:RefSeq mRNA;Acc:NM_001075695]	protein_coding	20.0866	65.7004
ENSBTAG00000018542	yes	2.58945	0.00693891	2.52236	0.00786919	yes	COX5B	cytochrome c oxidase subunit Vb [Source:NCBI gene;Acc:287012]	protein_coding	39.1328	70.0793
ENSBTAG00000014325	yes	2.62769	0.00506891	2.54787	0.00477272	yes	C3H1orf109	chromosome 3 C1orf109 homolog [Source:VGNC Symbol;Acc:VGNC:52706]	protein_coding	16.1761	33.1281
ENSBTAG00000012788	yes	2.88846	0.00236009	2.81913	0.00329043	yes	COX6A1	cytochrome c oxidase subunit VIa polypeptide 1 [Source:NCBI gene;Acc:282199]	protein_coding	25.1094	42.1361
ENSBTAG00000019909	yes	2.98088	0.000126131	2.88103	8.85793e-05	yes	SIRT6	Bos taurus sirtuin 6 (SIRT6), mRNA. [Source:RefSeq mRNA;Acc:NM_001098084]	protein_coding	22.0255	54.5813
ENSBTAG00000033679	yes	2.98137	0.00679049	2.87921	0.00757481	yes	HLCS	holocarboxylase synthetase [Source:VGNC Symbol;Acc:VGNC:50274]	protein_coding	11.1165	55.1796
ENSBTAG00000004295	yes	3.09504	0.00824792	2.99987	0.00984794	yes	NDUFA8	NADH:ubiquinone oxidoreductase subunit A8 [Source:VGNC Symbol;Acc:VGNC:31951]	protein_coding	22.4992	69.5811
ENSBTAG00000008348	yes	3.09602	0.000639996	3.02683	0.000544519	yes	NOL4L	nucleolar protein 4 like [Source:NCBI gene;Acc:785034]	protein_coding	12.2152	37.7476
ENSBTAG00000018688	yes	3.19501	0.0033503	3.07063	0.00541176	yes	CBR3	carbonyl reductase 3 [Source:VGNC Symbol;Acc:VGNC:53516]	protein_coding	17.2832	27.5107
ENSBTAG00000021160	yes	3.24495	0.00136741	3.19854	0.00194915	yes	AP1M2	adaptor related protein complex 1 subunit mu 2 [Source:VGNC Symbol;Acc:VGNC:25980]	protein_coding	19.3506	101.229
ENSBTAG00000018971	yes	3.27934	0.00886831	3.22047	0.00317349	yes	RAD51B	RAD51 paralog B [Source:VGNC Symbol;Acc:VGNC:33685]	protein_coding	4.36995	62.7629
ENSBTAG00000005634	yes	3.28034	0.00248761	3.17608	0.00235531	yes	LSM2	LSM2 homolog, U6 small nuclear RNA and mRNA degradation associated [Source:VGNC Symbol;Acc:VGNC:31054]	protein_coding	12.7487	58.3125
ENSBTAG00000015794	yes	3.33215	0.00177234	3.23567	0.00176335	yes	NES	Bos taurus nestin (NES), mRNA. [Source:RefSeq mRNA;Acc:NM_001206591]	protein_coding	12.0366	32.5818
ENSBTAG00000005009	yes	3.3648	0.00449935	3.23561	0.00420539	yes	PRELID1	Bos taurus PRELI domain containing 1 (PRELID1), mRNA. [Source:RefSeq mRNA;Acc:NM_001038138]	protein_coding	9.69348	14.3136
ENSBTAG00000008186	yes	3.42341	0.00143131	3.33059	0.00140671	yes	UBXN6	Bos taurus UBX domain protein 6 (UBXN6), mRNA. [Source:RefSeq mRNA;Acc:NM_001045986]	protein_coding	12.2993	20.8384
ENSBTAG00000000694	yes	3.50398	0.00591454	3.38252	0.00418661	yes	TAF10	Bos taurus TATA-box binding protein associated factor 10 (TAF10), mRNA. [Source:RefSeq mRNA;Acc:NM_001098968]	protein_coding	7.85317	41.7432
ENSBTAG00000007827	yes	3.64042	0.000461519	3.5488	0.000813435	yes	RCOR2	REST corepressor 2 [Source:VGNC Symbol;Acc:VGNC:33835]	protein_coding	16.0154	40.035
ENSBTAG00000046319	yes	3.7569	0.00657819	3.65221	0.00955736	yes	NDUFA7	NADH:ubiquinone oxidoreductase subunit A7 [Source:NCBI gene;Acc:338063]	protein_coding	10.0755	41.6441
ENSBTAG00000008648	yes	3.82442	0.00205543	3.75329	0.00175202	yes	PRDX5	Bos taurus peroxiredoxin 5 (PRDX5), mRNA. [Source:RefSeq mRNA;Acc:NM_174749]	protein_coding	7.47091	24.4557
ENSBTAG00000014553	yes	3.92427	0.000104319	3.83077	3.4241e-05	yes	ATP6V0D1	Bos taurus ATPase H+ transporting V0 subunit d1 (ATP6V0D1), mRNA. [Source:RefSeq mRNA;Acc:NM_174505]	protein_coding	10.622	72.4
ENSBTAG00000011416	yes	4.10867	0.00648556	4.0289	0.00901523	yes	ARHGEF39	Bos taurus Rho guanine nucleotide exchange factor 39 (ARHGEF39), mRNA. [Source:RefSeq mRNA;Acc:NM_001079800]	protein_coding	7.84331	37.7924
ENSBTAG00000000010	yes	4.14343	0.00139901	4.00452	0.0010842	yes	UBL7	Bos taurus ubiquitin like 7 (UBL7), mRNA. [Source:RefSeq mRNA;Acc:NM_001015573]	protein_coding	5.90024	19.9385
ENSBTAG00000005974	yes	4.17014	0.00134829	4.0219	0.000883447	yes	APOBEC2	apolipoprotein B mRNA editing enzyme catalytic subunit 2 [Source:VGNC Symbol;Acc:VGNC:26028]	protein_coding	4.99039	31.1279
ENSBTAG00000002748	yes	4.20057	0.00843113	4.16806	0.00820631	yes	PIP4P1	Bos taurus phosphatidylinositol-4,5-bisphosphate 4-phosphatase 1 (PIP4P1), mRNA. [Source:RefSeq mRNA;Acc:NM_001076359]	protein_coding	4.05804	26.0678
ENSBTAG00000038228	yes	4.24747	0.00321482	4.18895	0.0029814	yes	RTL8C	retrotransposon Gag like 8C [Source:NCBI gene;Acc:615809]	protein_coding	4.69801	32.1903
ENSBTAG00000016427	yes	4.3615	0.00753044	4.32538	0.00791949	yes	COMMD7	COMM domain containing 7 [Source:VGNC Symbol;Acc:VGNC:27587]	protein_coding	4.6614	9.08908
ENSBTAG00000012943	yes	4.47746	0.00422904	4.44753	0.00587379	yes	PPARGC1B	PPARG coactivator 1 beta [Source:VGNC Symbol;Acc:VGNC:33185]	protein_coding	6.69878	20.3062
ENSBTAG00000015092	yes	4.54587	0.0011055	4.4717	0.000725464	yes	NOL12	nucleolar protein 12 [Source:NCBI gene;Acc:615252]	protein_coding	4.82284	28.4664
ENSBTAG00000021617	yes	4.95738	0.00857136	4.9501	0.00939386	yes	ZC3HAV1	zinc finger CCCH-type containing, antiviral 1 [Source:VGNC Symbol;Acc:VGNC:37111]	protein_coding	3.22004	22.4769
ENSBTAG00000011825	yes	4.97639	0.00196859	4.8994	0.00215303	yes	TRIR	telomerase RNA component interacting RNase [Source:VGNC Symbol;Acc:VGNC:36362]	protein_coding	6.2506	29.9689
ENSBTAG00000011913	yes	5.34918	0.000820489	5.29338	0.000506323	yes	CKAP4	cytoskeleton associated protein 4 [Source:VGNC Symbol;Acc:VGNC:27382]	protein_coding	4.20219	21.8402
ENSBTAG00000007623	yes	5.89452	0.000168208	5.65009	0.000153792	yes	CPTP	Bos taurus ceramide-1-phosphate transfer protein (CPTP), mRNA. [Source:RefSeq mRNA;Acc:NM_001075182]	protein_coding	4.40975	21.2798
ENSBTAG00000008347	yes	6.07161	0.00224872	5.94896	0.00216856	yes	MRPL48	mitochondrial ribosomal protein L48 [Source:VGNC Symbol;Acc:VGNC:31643]	protein_coding	1.48632	16.9514
ENSBTAG00000017941	yes	7.49609	3.50824e-05	7.36032	5.27671e-06	yes	NSUN5	Bos taurus NOP2/Sun RNA methyltransferase family member 5 (NSUN5), mRNA. [Source:RefSeq mRNA;Acc:NM_001102303]	protein_coding	2.84096	15.8918
ENSBTAG00000011414	yes	7.98245	0.000369805	7.85244	0.000384265	yes	EIF2B5	eukaryotic translation initiation factor 2B subunit epsilon [Source:VGNC Symbol;Acc:VGNC:28388]	protein_coding	2.571	10.4986
ENSBTAG00000013507	yes	10.657	0.00235095	10.0298	0.00420261	yes	LOC507527	Bos taurus cornifin-B-like (LOC507527), mRNA. [Source:RefSeq mRNA;Acc:NM_001034301]	protein_coding	0.979048	20.4244
ENSBTAG00000002019	yes	10.7028	0.00150872	10.5423	0.00220033	yes	SERPINB5	Bos taurus serpin family B member 5 (SERPINB5), mRNA. [Source:RefSeq mRNA;Acc:NM_001098080]	protein_coding	1.40745	6.43895
ENSBTAG00000014536	yes	11.5109	0.000978906	11.2077	0.00201484	yes	SFXN1	sideroflexin 1 [Source:VGNC Symbol;Acc:VGNC:34530]	protein_coding	0.559448	6.00907
ENSBTAG00000015504	yes	13.0116	0.00128433	12.9575	0.00262693	yes	ZNF131	Bos taurus zinc finger protein 131 (ZNF131), mRNA. [Source:RefSeq mRNA;Acc:NM_001101218]	protein_coding	0.460797	21.0236
ENSBTAG00000021785	yes	15.0318	0.000753904	14.5473	0.00116521	yes	TMEM219	Bos taurus transmembrane protein 219 (TMEM219), transcript variant 1, mRNA. [Source:RefSeq mRNA;Acc:NM_001080231]	protein_coding	1.39636	14.9787
ENSBTAG00000001744	yes	16.3629	0.00233519	16.0128	0.00384032	yes	BET1L	Bos taurus Bet1 golgi vesicular membrane trafficking protein like (BET1L), mRNA. [Source:RefSeq mRNA;Acc:NM_001034362]	protein_coding	0.866569	14.1654
ENSBTAG00000036028	yes	31.3638	0.000236447	32.4251	0.000818528	yes	BEX2	Bos taurus brain expressed X-linked 2 (BEX2), mRNA. [Source:RefSeq mRNA;Acc:NM_001077087]	protein_coding	0.129747	4.32122
ENSBTAG00000009554	yes	37.1424	0.000164701	40.176	0.000902492	yes	EHBP1L1	Bos taurus EH domain binding protein 1 like 1 (EHBP1L1), mRNA. [Source:RefSeq mRNA;Acc:NM_001354719]	protein_coding	0.104177	18.4148
ENSBTAG00000007690	yes	37.2488	8.02042e-06	36.1871	6.06517e-06	yes	AGXT2	Bos taurus alanine--glyoxylate aminotransferase 2 (AGXT2), mRNA. [Source:RefSeq mRNA;Acc:NM_001075821]	protein_coding	0.49905	3.93742
ENSBTAG00000019530	no	-327.112	0.000803735	-267.321	0.00835671	yes	KDM8	Bos taurus lysine demethylase 8 (KDM8), mRNA. [Source:RefSeq mRNA;Acc:NM_001075339]	protein_coding	3.15458	0
ENSBTAG00000024803	no	-32.3784	0.00052475	-26.8104	0.000111899	yes	ENDOD1	Bos taurus endonuclease domain containing 1 (ENDOD1), mRNA. [Source:RefSeq mRNA;Acc:NM_001102519]	protein_coding	5.38873	0.15936
ENSBTAG00000021046	no	-32.1703	0.00067812	-25.779	0.000182533	yes	ELAVL4	Bos taurus ELAV like RNA binding protein 4 (ELAVL4), mRNA. [Source:RefSeq mRNA;Acc:NM_001081606]	protein_coding	6.7388	0.200269
ENSBTAG00000017685	no	-21.3717	0.00496469	-20.2417	0.00295356	yes	JUP	Bos taurus junction plakoglobin (JUP), mRNA. [Source:RefSeq mRNA;Acc:NM_001004024]	protein_coding	5.62629	0.256843
ENSBTAG00000017680	no	-9.30339	0.0064511	-10.6923	0.00311674	yes	NOS3	nitric oxide synthase 3 [Source:VGNC Symbol;Acc:VGNC:32174]	protein_coding	6.56475	0.696946
ENSBTAG00000003298	no	-6.20239	0.00594835	-7.111	0.00229885	yes	LZTS2	Bos taurus leucine zipper tumor suppressor 2 (LZTS2), mRNA. [Source:RefSeq mRNA;Acc:NM_001098862]	protein_coding	16.5475	2.65551
ENSBTAG00000043550	no	-2.49743	0.00639823	-1.81279	0.00361581	yes	CYTB (mitochondrial)	cytochrome b [Source:NCBI gene (formerly Entrezgene);Acc:3283889]	protein_coding	2211.04	885.506
ENSBTAG00000043559	no	-2.38072	0.00772561	-1.6354	0.00748427	yes	ND4L (mitochondrial)	NADH dehydrogenase subunit 4L [Source:NCBI gene (formerly Entrezgene);Acc:3283885]	protein_coding	217.088	91.1711
ENSBTAG00000043568	no	-2.33027	0.00662787	-1.55607	0.00525849	yes	ND3 (mitochondrial)	NADH dehydrogenase subunit 3 [Source:NCBI gene (formerly Entrezgene);Acc:3283884]	protein_coding	346.666	148.754
ENSBTAG00000043577	no	-2.25787	0.00980041	-1.44517	0.00593529	yes	ND4 (mitochondrial)	NADH dehydrogenase subunit 4 [Source:NCBI gene (formerly Entrezgene);Acc:3283886]	protein_coding	2222.41	984.435
ENSBTAG00000043584	no	-2.113	0.00616559	-1.23598	0.00357669	yes	ATP6 (mitochondrial)	ATP synthase F0 subunit 6 [Source:NCBI gene (formerly Entrezgene);Acc:3283882]	protein_coding	1279.09	605.292
ENSBTAG00000043546	no	-2.0139	0.00141176	-1.07857	0.000635972	yes	ND6 (mitochondrial)	NADH dehydrogenase subunit 6 [Source:NCBI gene (formerly Entrezgene);Acc:3283888]	protein_coding	220.998	109.688
ENSBTAG00000003532	no	-1.77725	0.00926286	-0.754259	0.00246623	yes	TLE4	transducin like enhancer of split 4 [Source:VGNC Symbol;Acc:VGNC:35892]	protein_coding	82.9441	46.6409
ENSBTAG00000005304	no	-1.67091	0.00694038	-0.615675	0.0025531	yes	SRM	Bos taurus spermidine synthase (SRM), mRNA. [Source:RefSeq mRNA;Acc:NM_001303623]	protein_coding	146.799	87.8265
ENSBTAG00000010958	no	-1.56205	0.00693575	-0.477616	0.0016449	yes			protein_coding	185.214	118.485
ENSBTAG00000008180	no	-1.53821	0.00927064	-0.458095	0.0032346	yes	SPDL1	Bos taurus spindle apparatus coiled-coil protein 1 (SPDL1), mRNA. [Source:RefSeq mRNA;Acc:NM_001076854]	protein_coding	263.606	171.263
ENSBTAG00000015251	no	-1.42122	0.00791867	-0.305596	0.000683028	yes	ALG13	putative bifunctional UDP-N-acetylglucosamine transferase and deubiquitinase ALG13 [Source:NCBI gene (formerly Entrezgene);Acc:515282]	protein_coding	404.825	284.692
ENSBTAG00000013030	no	1.64344	0.00654086	1.6026	0.00741766	yes	LRRC8A	Bos taurus leucine rich repeat containing 8 VRAC subunit A (LRRC8A), mRNA. [Source:RefSeq mRNA;Acc:NM_001076807]	protein_coding	84.1713	138.325
ENSBTAG00000010422	no	1.67402	0.00243696	1.61468	0.00407138	yes	MDM2	Bos taurus MDM2 proto-oncogene (MDM2), mRNA. [Source:RefSeq mRNA;Acc:NM_001099107]	protein_coding	126.683	211.986
ENSBTAG00000022044	no	1.67743	0.00329572	1.62528	0.00511582	yes	RAB35	Bos taurus RAB35, member RAS oncogene family (RAB35), mRNA. [Source:RefSeq mRNA;Acc:NM_001098127]	protein_coding	105.369	176.697
ENSBTAG00000038439	no	1.79055	0.00292878	1.72895	0.00171397	yes	H1F0	H1 histone family, member 0 [Source:NCBI gene;Acc:617975]	protein_coding	53.4814	95.7724
ENSBTAG00000021251	no	2.12913	0.00693911	2.07447	0.00540034	yes	RIPK4	Bos taurus receptor interacting serine/threonine kinase 4 (RIPK4), mRNA. [Source:RefSeq mRNA;Acc:NM_001100327]	protein_coding	29.1567	62.1008
ENSBTAG00000008363	no	2.24686	0.005611	2.16887	0.0061885	yes	EXD1	exonuclease 3'-5' domain containing 1 [Source:VGNC Symbol;Acc:VGNC:28639]	protein_coding	28.9595	65.0386
ENSBTAG00000017017	no	2.39496	0.0078762	2.31776	0.0025137	yes	CTPS2	Bos taurus CTP synthase 2 (CTPS2), mRNA. [Source:RefSeq mRNA;Acc:NM_001076966]	protein_coding	12.4882	29.9267
ENSBTAG00000003484	no	2.45673	0.00688098	2.38284	0.00423796	yes	C3H1orf123	chromosome 3 C1orf123 homolog [Source:VGNC Symbol;Acc:VGNC:54904]	protein_coding	14.1189	34.6998
ENSBTAG00000039313	no	2.50806	0.00589347	2.42489	0.00866649	yes	ZNF341	Bos taurus zinc finger protein 341 (ZNF341), mRNA. [Source:RefSeq mRNA;Acc:NM_001192576]	protein_coding	21.5274	53.9686
ENSBTAG00000013753	no	2.75787	0.00733599	2.67936	0.00291038	yes	DDRGK1	Bos taurus DDRGK domain containing 1 (DDRGK1), mRNA. [Source:RefSeq mRNA;Acc:NM_001075498]	protein_coding	10.3728	28.6232
ENSBTAG00000014064	no	3.2699	0.00523618	3.17554	0.00119099	yes	FGFR2	Bos taurus fibroblast growth factor receptor 2 (FGFR2), mRNA. [Source:RefSeq mRNA;Acc:NM_001205310]	protein_coding	5.82955	19.0782
ENSBTAG00000013869	no	3.31226	0.00906513	3.18732	0.00730493	yes	SH3BP4	Bos taurus SH3 domain binding protein 4 (SH3BP4), mRNA. [Source:RefSeq mRNA;Acc:NM_001144088]	protein_coding	6.4761	21.4596
ENSBTAG00000016568	no	3.58783	0.00891102	3.44257	0.00526863	yes	LUC7L	LUC7 like [Source:VGNC Symbol;Acc:VGNC:31079]	protein_coding	4.97585	17.8541
ENSBTAG00000014442	no	5.27956	0.00800155	5.04242	0.00873286	yes	MTG2	Bos taurus mitochondrial ribosome associated GTPase 2 (MTG2), mRNA. [Source:RefSeq mRNA;Acc:NM_001014874]	protein_coding	2.5383	13.4453
ENSBTAG00000015639	no	5.47871	0.00411257	5.34102	0.00834428	yes	ERAL1	Era like 12S mitochondrial rRNA chaperone 1 [Source:VGNC Symbol;Acc:VGNC:28559]	protein_coding	17.1097	93.729
ENSBTAG00000021037	no	7.00149	0.00576084	6.8541	0.00889339	yes	ARNT	aryl hydrocarbon receptor nuclear translocator [Source:HGNC Symbol;Acc:HGNC:700]	protein_coding	1.36784	9.61586
ENSBTAG00000025540	no	7.68839	0.00583507	7.47488	0.00873658	yes	ALKBH7	Bos taurus alkB homolog 7 (ALKBH7), mRNA. [Source:RefSeq mRNA;Acc:NM_001046402]	protein_coding	2.26161	17.4219
* Yes indicates that the transcript appeared as a DEG on the initial analysis and the validation analysis that removed oocyte library 3. No indicates that the transcript only appeared as a deg on the initial analysis and did not pass validation. Only transcripts denoted as "yes" are reported in the manuscript.

## Sheet: S2c_Large_Spont
Table S2c: Differentially abundant gene transcripts between large and spontaneous follicle oocyte pools.
Gene ID	edgeR analysis		DESeq2 analysis			external gene name	description	gene biotype	mean CPM large	mean CPM spontaneous
	fold change	nominal P value	fold change	nominal P value	eFDR < 0.05
ENSBTAG00000019530	-83.2259	0.000414148	-539.614	2.94932e-14	yes	KDM8	Bos taurus lysine demethylase 8 (KDM8), mRNA. [Source:RefSeq mRNA;Acc:NM_001075339]	protein_coding	5.38795	0
ENSBTAG00000024803	-21.4271	0.00110662	-22.3893	0.000416786	yes	ENDOD1	Bos taurus endonuclease domain containing 1 (ENDOD1), mRNA. [Source:RefSeq mRNA;Acc:NM_001102519]	protein_coding	4.11015	0.15936
ENSBTAG00000039563	-21.1667	0.00170645	-21.7341	0.000331085	yes	LOC528282	phosphatidylcholine transfer protein [Source:NCBI gene (formerly Entrezgene);Acc:5283282]	protein_coding	9.66791	0.390232
ENSBTAG00000000076	-19.0408	0.00146076	-19.3164	0.00057755	yes	RECK	reversion inducing cysteine rich protein with kazal motifs [Source:VGNC Symbol;Acc:VGNC:33847]	protein_coding	5.0307	0.235863
ENSBTAG00000021046	-16.0609	0.00421572	-16.5324	0.00275571	yes	ELAVL4	Bos taurus ELAV like RNA binding protein 4 (ELAVL4), mRNA. [Source:RefSeq mRNA;Acc:NM_001081606]	protein_coding	3.36167	0.200269
ENSBTAG00000012715	-15.5632	0.000694518	-15.9488	0.000141477	yes	KIF26B	kinesin family member 26B [Source:NCBI gene;Acc:101902369]	protein_coding	7.74373	0.495848
ENSBTAG00000038770	-15.3747	0.00251559	-15.6697	0.000816628	yes	LOC513767	Bos taurus phosphatidylcholine transfer protein-like (LOC513767), mRNA. [Source:RefSeq mRNA;Acc:NM_001083681]	protein_coding	7.47675	0.485216
ENSBTAG00000002391	-15.1958	0.00324326	-15.5971	0.00155781	yes	TGFB1I1	transforming growth factor beta 1 induced transcript 1 [Source:VGNC Symbol;Acc:VGNC:35801]	protein_coding	9.75582	0.646488
ENSBTAG00000020338	-14.217	0.0047106	-14.5142	0.00573176	yes	CCT6B	Bos taurus chaperonin containing TCP1 subunit 6B (CCT6B), mRNA. [Source:RefSeq mRNA;Acc:NM_001034642]	protein_coding	4.14201	0.294018
ENSBTAG00000000140	-13.0346	0.00257385	-13.2081	0.000935467	yes	EPHX1	epoxide hydrolase 1 [Source:VGNC Symbol;Acc:VGNC:28541]	protein_coding	8.36832	0.676142
ENSBTAG00000007015	-11.3558	0.00548194	-11.6166	0.00288178	yes	COX11	Bos taurus cytochrome c oxidase copper chaperone COX11 (COX11), mRNA. [Source:RefSeq mRNA;Acc:NM_001083403]	protein_coding	5.84372	0.552118
ENSBTAG00000001567	-10.1287	0.00621805	-10.3488	0.00270171	yes	LRRK1	Bos taurus leucine rich repeat kinase 1 (LRRK1), mRNA. [Source:RefSeq mRNA;Acc:NM_001205774]	protein_coding	15.2607	1.67096
ENSBTAG00000021103	-7.82457	0.00478892	-7.89008	0.0010564	yes	SLC35F5	Bos taurus solute carrier family 35 member F5 (SLC35F5), mRNA. [Source:RefSeq mRNA;Acc:NM_001101242]	protein_coding	8.64493	1.23148
ENSBTAG00000009152	-6.50219	0.00350276	-6.51266	0.000835344	yes	ZNF391	Bos taurus zinc finger protein 391 (ZNF391), mRNA. [Source:RefSeq mRNA;Acc:NM_001100352]	protein_coding	14.0761	2.39571
ENSBTAG00000011336	-6.22068	0.00467059	-6.23712	0.00167305	yes	OTOGL	otogelin like [Source:VGNC Symbol;Acc:VGNC:32486]	protein_coding	13.7919	2.43807
ENSBTAG00000019658	-6.10464	0.0056921	-6.21037	0.000962305	yes	ASB16	ankyrin repeat and SOCS box containing 16 [Source:VGNC Symbol;Acc:VGNC:26193]	protein_coding	13.395	2.4081
ENSBTAG00000016350	-6.08442	0.00458453	-6.24613	0.00171166	yes	NACC1	Bos taurus nucleus accumbens associated 1 (NACC1), mRNA. [Source:RefSeq mRNA;Acc:NM_001192612]	protein_coding	20.7029	3.73747
ENSBTAG00000016972	-5.31035	0.00355138	-5.39375	0.000941958	yes	RAB11FIP4	RAB11 family interacting protein 4 [Source:VGNC Symbol;Acc:VGNC:33619]	protein_coding	17.7631	3.58586
ENSBTAG00000007506	-4.66179	0.00917645	-4.65128	0.00617671	yes	CACNG7	calcium voltage-gated channel auxiliary subunit gamma 7 [Source:VGNC Symbol;Acc:VGNC:26692]	protein_coding	27.5919	6.16658
ENSBTAG00000015878	-4.29125	0.00301476	-4.32004	0.000156286	yes	RHNO1	Bos taurus RAD9-HUS1-RAD1 interacting nuclear orphan 1 (RHNO1), mRNA. [Source:RefSeq mRNA;Acc:NM_001075631]	protein_coding	14.5172	3.44284
ENSBTAG00000018033	-4.08432	0.00437519	-4.15161	0.000915903	yes	PIP4K2A	phosphatidylinositol-5-phosphate 4-kinase type 2 alpha [Source:VGNC Symbol;Acc:VGNC:32906]	protein_coding	22.6622	5.57511
ENSBTAG00000006015	-3.64522	0.00876032	-3.69649	0.00283145	yes	POLH	Bos taurus DNA polymerase eta (POLH), mRNA. [Source:RefSeq mRNA;Acc:NM_001034450]	protein_coding	18.8546	5.01017
ENSBTAG00000008025	-2.79993	0.000401173	-2.85624	5.46641e-05	yes	UBE3C	Bos taurus ubiquitin protein ligase E3C (UBE3C), mRNA. [Source:RefSeq mRNA;Acc:NM_001192188]	protein_coding	52.9806	16.5993
ENSBTAG00000004885	-2.65269	0.0073308	-2.66641	0.00144006	yes	DDR2	discoidin domain receptor tyrosine kinase 2 [Source:VGNC Symbol;Acc:VGNC:27953]	protein_coding	21.8587	7.05602
ENSBTAG00000038093	-2.62545	0.00116489	-2.631	0.000310823	yes	PEG10	paternally expressed 10 [Source:VGNC Symbol;Acc:VGNC:50004]	protein_coding	44.0349	14.3068
ENSBTAG00000040108	-2.58788	0.00161315	-2.64878	0.000512625	yes	ZNF829	zinc finger protein 829 [Source:HGNC Symbol;Acc:HGNC:34032	protein_coding	49.9737	16.3729
ENSBTAG00000031261	-2.34232	0.00331262	-2.3722	0.00170332	yes	REPS2	RALBP1 associated Eps domain containing 2 [Source:VGNC Symbol;Acc:VGNC:33870]	protein_coding	49.985	17.2915
ENSBTAG00000002948	-1.99623	0.00575485	-2.04421	0.00259387	yes	SETD2	SET domain containing 2 [Source:VGNC Symbol;Acc:VGNC:34493]	protein_coding	47.5828	17.8623
ENSBTAG00000015475	-1.80345	0.00617141	-1.85808	0.0016634	yes	MORC1	MORC family CW-type zinc finger 1 [Source:VGNC Symbol;Acc:VGNC:31554]	protein_coding	39.5394	15.5707
ENSBTAG00000005916	-1.46642	0.00376132	-1.4969	0.00163067	yes	ADNP2	Bos taurus ADNP homeobox 2 (ADNP2), mRNA. [Source:RefSeq mRNA;Acc:NM_001101840]	protein_coding	61.4577	26.5228
ENSBTAG00000015158	-1.22054	0.00317476	-1.24757	0.000885167	yes	INTS14	integrator complex subunit 14 [Source:VGNC Symbol;Acc:VGNC:30227]	protein_coding	59.4326	27.6216
ENSBTAG00000017788	-0.987529	0.00655953	-1.02412	0.00295029	yes	AKT3	Bos taurus AKT serine/threonine kinase 3 (AKT3), mRNA. [Source:RefSeq mRNA;Acc:NM_001191309]	protein_coding	74.3062	37.302
ENSBTAG00000007703	-0.844084	0.00407462	-0.869256	0.00077521	yes	NMT2	Bos taurus N-myristoyltransferase 2 (NMT2), mRNA. [Source:RefSeq mRNA;Acc:NM_174456]	protein_coding	74.4814	39.3667
ENSBTAG00000001600	-0.841348	0.00617902	-0.862269	0.000538339	yes	DCUN1D4	defective in cullin neddylation 1 domain containing 4 [Source:VGNC Symbol;Acc:VGNC:53698]	protein_coding	52.551	27.8028
ENSBTAG00000020777	-0.778936	0.00323643	-0.808591	0.000728538	yes	ERCC3	Bos taurus ERCC excision repair 3, TFIIH core complex helicase subunit (ERCC3), mRNA. [Source:RefSeq mRNA;Acc:NM_001045988]	protein_coding	83.609	45.3246
ENSBTAG00000002345	-0.615876	0.00219342	-0.629073	0.000753822	yes	SETD1A	SET domain containing 1A [Source:VGNC Symbol;Acc:VGNC:34492]	protein_coding	146.471	84.9773
ENSBTAG00000007588	-0.595771	0.00911281	-0.604468	0.00715332	yes	ERLIN1	Bos taurus ER lipid raft associated 1 (ERLIN1), mRNA. [Source:RefSeq mRNA;Acc:NM_001164032]	protein_coding	124.792	73.0381
ENSBTAG00000012833	-0.5941	0.00904905	-0.625861	0.00402072	yes	ATG2B	Bos taurus autophagy related 2B (ATG2B), mRNA. [Source:RefSeq mRNA;Acc:NM_001206753]	protein_coding	116.665	68.3428
ENSBTAG00000011626	-0.580236	0.00676129	-0.593269	0.00472026	yes	ATP2C1	ATPase secretory pathway Ca2+ transporting 1 [Source:VGNC Symbol;Acc:VGNC:26296]	protein_coding	132.218	77.9422
ENSBTAG00000001949	-0.4318	0.00345926	-0.449642	0.000611457	yes	ZNF2	zinc finger protein 2 [Source:VGNC Symbol;Acc:VGNC:37221]	protein_coding	202.371	128.267
ENSBTAG00000032151	-0.423685	0.00422188	-0.437099	0.00184326	yes	CCDC73	coiled-coil domain containing 73 [Source:VGNC Symbol;Acc:VGNC:26914]	protein_coding	289.22	184.08
ENSBTAG00000012352	-0.40569	0.00366286	-0.416688	0.000516413	yes	PARP16	Bos taurus poly(ADP-ribose) polymerase family member 16 (PARP16), mRNA. [Source:RefSeq mRNA;Acc:NM_001083379]	protein_coding	175.631	112.876
ENSBTAG00000006672	-0.293577	0.0084852	-0.305002	0.00349577	yes	SYNCRIP	synaptotagmin binding cytoplasmic RNA interacting protein [Source:VGNC Symbol;Acc:VGNC:35518]	protein_coding	312.418	214.475
ENSBTAG00000000725	0.391229	0.00881896	0.37678	0.00748422	yes	USP42	ubiquitin specific peptidase 42 [Source:VGNC Symbol;Acc:VGNC:50065]	protein_coding	123.407	190.261
ENSBTAG00000010715	0.446645	0.00725854	0.438877	0.00795797	yes	MRPL37	Bos taurus mitochondrial ribosomal protein L37 (MRPL37), mRNA. [Source:RefSeq mRNA;Acc:NM_001083400]	protein_coding	186.249	295.868
ENSBTAG00000020807	0.770133	0.00847609	0.739808	0.00951474	yes	FAU	FAU, ubiquitin like and ribosomal protein S30 fusion [Source:NCBI gene;Acc:282847]	protein_coding	73.1092	134.228
ENSBTAG00000010242	0.864291	0.0013709	0.85923	0.00147596	yes	LAMP1	Bos taurus lysosomal associated membrane protein 1 (LAMP1), mRNA. [Source:RefSeq mRNA;Acc:NM_001075124]	protein_coding	74.6718	142.211
ENSBTAG00000046239	0.914208	0.0038408	0.895504	0.00301892	yes	LCOR	ligand dependent nuclear receptor corepressor [Source:NCBI gene;Acc:100849063]	protein_coding	47.7062	92.4944
ENSBTAG00000001508	0.949212	0.00569912	0.92581	0.00306025	yes	SH3RF1	Bos taurus SH3 domain containing ring finger 1 (SH3RF1), mRNA. [Source:RefSeq mRNA;Acc:NM_001098065]	protein_coding	43.2336	84.911
ENSBTAG00000040308	0.965539	0.00512578	0.924853	0.0067112	yes	RPS13	ribosomal protein S13 [Source:NCBI gene;Acc:535668]	protein_coding	61.82	122.074
ENSBTAG00000015119	0.99686	0.00699787	0.99385	0.00634646	yes	SIK3	SIK family kinase 3 [Source:VGNC Symbol;Acc:VGNC:34620]	protein_coding	39.9493	79.7828
ENSBTAG00000018496	1.07713	0.00440285	1.05855	0.00446326	yes	TIMM17B	Bos taurus translocase of inner mitochondrial membrane 17B (TIMM17B), mRNA. [Source:RefSeq mRNA;Acc:NM_001046488]	protein_coding	49.7506	102.098
ENSBTAG00000012995	1.12915	0.0036967	1.10763	0.0018468	yes	MCUB	mitochondrial calcium uniporter dominant negative beta subunit [Source:VGNC Symbol;Acc:VGNC:31326]	protein_coding	32.2355	67.3149
ENSBTAG00000015807	1.2054	0.00792766	1.17657	0.00321735	yes	GALT	galactose-1-phosphate uridylyltransferase [Source:VGNC Symbol;Acc:VGNC:29242]	protein_coding	24.6853	52.8115
ENSBTAG00000009795	1.2063	0.00497655	1.1652	0.00379567	yes	SF3B5	splicing factor 3b subunit 5 [Source:VGNC Symbol;Acc:VGNC:34512]	protein_coding	30.361	64.9686
ENSBTAG00000046712	1.21252	0.00333126	1.19537	0.0019245	yes	PSMC2	Bos taurus proteasome 26S subunit, ATPase 2 (PSMC2), mRNA. [Source:RefSeq mRNA;Acc:NM_001015639]	protein_coding	33.5899	72.0319
ENSBTAG00000014520	1.29119	0.00363958	1.2579	0.000462381	yes	LIAS	Bos taurus lipoic acid synthetase (LIAS), mRNA. [Source:RefSeq mRNA;Acc:NM_001017944]	protein_coding	22.6378	49.7421
ENSBTAG00000005096	1.32507	0.00541181	1.29637	0.0053334	yes	COX7A2	cytochrome c oxidase subunit 7A2 [Source:VGNC Symbol;Acc:VGNC:53788]	protein_coding	32.6335	72.4516
ENSBTAG00000011145	1.32969	0.00135111	1.31102	0.00171075	yes	NDUFA4	NDUFA4, mitochondrial complex associated [Source:VGNC Symbol;Acc:VGNC:31947]	protein_coding	54.2838	120.667
ENSBTAG00000021023	1.53144	0.00416957	1.50047	0.00161886	yes	ZMYM4	zinc finger MYM-type containing 4 [Source:VGNC Symbol;Acc:VGNC:37200]	protein_coding	21.6509	51.0101
ENSBTAG00000012838	1.53651	0.00418679	1.5046	0.00184554	yes	RDH12	retinol dehydrogenase 12 [Source:VGNC Symbol;Acc:VGNC:52816]	protein_coding	21.194	50.0342
ENSBTAG00000015402	1.58824	0.00439582	1.57334	0.00597224	yes	GREB1	growth regulating estrogen receptor binding 1 [Source:VGNC Symbol;Acc:VGNC:53640]	protein_coding	44.4107	106.347
ENSBTAG00000011784	1.84558	0.00380648	1.84127	0.00381957	yes	FGR	FGR proto-oncogene, Src family tyrosine kinase [Source:VGNC Symbol;Acc:VGNC:28994]	protein_coding	23.8073	61.0316
ENSBTAG00000020439	2.16774	0.00646529	2.1235	0.00241389	yes	BUD31	BUD31 homolog [Source:VGNC Symbol;Acc:VGNC:26609]	protein_coding	10.2789	28.522
ENSBTAG00000005634	2.20095	0.00862973	2.17641	0.00706947	yes	LSM2	LSM2 homolog, U6 small nuclear RNA and mRNA degradation associated [Source:VGNC Symbol;Acc:VGNC:31054]	protein_coding	14.9285	41.7432
ENSBTAG00000021979	2.37911	0.0014548	2.31875	0.00105188	yes	EEF1B2	Bos taurus eukaryotic translation elongation factor 1 beta 2 (EEF1B2), mRNA. [Source:RefSeq mRNA;Acc:NM_001014936]	protein_coding	18.3069	53.3034
ENSBTAG00000012501	2.39819	0.0045584	2.36377	0.0047888	yes	FTO	Bos taurus FTO, alpha-ketoglutarate dependent dioxygenase (FTO), mRNA. [Source:RefSeq mRNA;Acc:NM_001098142]	protein_coding	17.3945	50.8784
ENSBTAG00000030302	2.4844	0.00258342	2.47007	0.00341571	yes	EDF1	Bos taurus endothelial differentiation related factor 1 (EDF1), mRNA. [Source:RefSeq mRNA;Acc:NM_001035307]	protein_coding	28.2503	84.2387
ENSBTAG00000005735	2.62518	0.0039536	2.55181	0.00168977	yes	ATP5MC2	ATP synthase membrane subunit c locus 2 [Source:VGNC Symbol;Acc:VGNC:55848]	protein_coding	8.21232	25.2504
ENSBTAG00000007812	2.64045	0.00233857	2.63818	0.00272438	yes	NDUFA13	NADH:ubiquinone oxidoreductase subunit A13 [Source:VGNC Symbol;Acc:VGNC:31946]	protein_coding	20.5958	63.5106
ENSBTAG00000002678	3.08723	0.00119745	3.0667	0.000930156	yes	MED18	Bos taurus mediator complex subunit 18 (MED18), mRNA. [Source:RefSeq mRNA;Acc:NM_001076235]	protein_coding	11.8486	40.053
ENSBTAG00000005009	3.16702	0.00386743	3.10872	0.00288196	yes	PRELID1	Bos taurus PRELI domain containing 1 (PRELID1), mRNA. [Source:RefSeq mRNA;Acc:NM_001038138]	protein_coding	9.48989	32.5818
ENSBTAG00000000694	4.231	0.00181278	4.20332	0.00084361	yes	TAF10	Bos taurus TATA-box binding protein associated factor 10 (TAF10), mRNA. [Source:RefSeq mRNA;Acc:NM_001098968]	protein_coding	6.60535	27.5107
ENSBTAG00000020843	4.67428	0.00196942	4.59984	0.00234893	yes	PCSK1	Bos taurus proprotein convertase subtilisin/kexin type 1 (PCSK1), mRNA. [Source:RefSeq mRNA;Acc:NM_174412]	protein_coding	6.23647	27.9221
ENSBTAG00000017488	4.71183	0.00421225	4.67143	0.00578922	yes	KLF3	Kruppel like factor 3 [Source:VGNC Symbol;Acc:VGNC:30630]	protein_coding	7.10941	32.0242
ENSBTAG00000011825	4.82409	0.0032302	4.84614	0.00319425	yes	TRIR	telomerase RNA component interacting RNase [Source:VGNC Symbol;Acc:VGNC:36362]	protein_coding	6.78416	31.1279
ENSBTAG00000015117	5.45104	0.000529288	5.35129	0.000562679	yes	GADD45GIP1	Bos taurus GADD45G interacting protein 1 (GADD45GIP1), mRNA. [Source:RefSeq mRNA;Acc:NM_001080224]	protein_coding	4.73602	23.9117
ENSBTAG00000015639	6.60735	0.00271712	6.69267	0.00475409	yes	ERAL1	Era like 12S mitochondrial rRNA chaperone 1 [Source:VGNC Symbol;Acc:VGNC:28559]	protein_coding	15.7764	93.729
ENSBTAG00000010065	8.65598	0.00541601	8.65421	0.00889963	yes	TRPC5	Bos taurus transient receptor potential cation channel subfamily C member 5 (TRPC5), mRNA. [Source:RefSeq mRNA;Acc:NM_001166574]	protein_coding	0.845948	6.5722
ENSBTAG00000015764	9.34143	0.00327861	9.52097	0.00427288	yes	EML2	echinoderm microtubule associated protein like 2 [Source:VGNC Symbol;Acc:VGNC:28476]	protein_coding	1.30903	10.9344
ENSBTAG00000025540	10.5816	0.00252174	10.69	0.00315794	yes	ALKBH7	Bos taurus alkB homolog 7 (ALKBH7), mRNA. [Source:RefSeq mRNA;Acc:NM_001046402]	protein_coding	1.81746	17.4219
ENSBTAG00000033702	10.6422	0.0031398	10.6711	0.00552461	yes	STARD8	Bos taurus StAR related lipid transfer domain containing 8 (STARD8), mRNA. [Source:RefSeq mRNA;Acc:NM_001102517]	protein_coding	1.10355	10.6553
ENSBTAG00000003679	12.8169	0.00482619	12.8	0.00835766	yes	PAAF1	Bos taurus proteasomal ATPase associated factor 1 (PAAF1), mRNA. [Source:RefSeq mRNA;Acc:NM_001075990]	protein_coding	0.75144	9.04052
