# Supplementary material for: Differential Transcript Profiles in Cumulus-Oocyte Complexes Originating from Pre-Ovulatory Follicles of Varied Physiological Maturity in Beef Cows
Source: Genes (Basel). 2021 Jun 10;12(6):893. doi: 10.3390/genes12060893 (PMC8227736; doi:10.3390/genes12060893)
Supplement: Supplementary file 1 [file genes-12-00893-s001.zip › Table_S3.xlsx]

## Sheet: S3a_small_spont_post_validation
Table S3a. Pathways and gene ontologies enriched in the gene transcripts that were differentially abundant between small and spontaneous follicle oocyte pools.*
database	entry	term	pathway_or_ontology	number_DEG_in_entry	p_value	Benjamini	ensembl_gene_id	gene_name	gene_regulation_small_vs_spont
DAVID	bta00190	Oxidative phosphorylation	KEGG_pathway	8	3.5e-06	0.00018	ENSBTAG00000014553	ATPase H+ transporting V0 subunit d1(ATP6V0D1)	DOWN
DAVID	bta00190	Oxidative phosphorylation	KEGG_pathway	8	3.5e-06	0.00018	ENSBTAG00000043558	NADH dehydrogenase subunit 1(ND1)	UP
DAVID	bta00190	Oxidative phosphorylation	KEGG_pathway	8	3.5e-06	0.00018	ENSBTAG00000043563	NADH dehydrogenase subunit 5(ND5)	UP
DAVID	bta00190	Oxidative phosphorylation	KEGG_pathway	8	3.5e-06	0.00018	ENSBTAG00000046319	NADH:ubiquinone oxidoreductase subunit A7(NDUFA7)	DOWN
DAVID	bta00190	Oxidative phosphorylation	KEGG_pathway	8	3.5e-06	0.00018	ENSBTAG00000004295	NADH:ubiquinone oxidoreductase subunit A8(NDUFA8)	DOWN
DAVID	bta00190	Oxidative phosphorylation	KEGG_pathway	8	3.5e-06	0.00018	ENSBTAG00000043561	cytochrome c oxidase subunit I(COX1)	UP
DAVID	bta00190	Oxidative phosphorylation	KEGG_pathway	8	3.5e-06	0.00018	ENSBTAG00000012788	cytochrome c oxidase subunit VIa polypeptide 1(COX6A1)	DOWN
DAVID	bta00190	Oxidative phosphorylation	KEGG_pathway	8	3.5e-06	0.00018	ENSBTAG00000018542	cytochrome c oxidase subunit Vb(COX5B)	DOWN
* This table represents functional analysis of DEGs reported in the manuscript following validation procedures.

## Sheet: S3b_small_spont_pre_validation
Table S3b. Pathways and gene ontologies enriched in the gene transcriptsthat were differentially abundant (pre-validation) between small and spontaneous follicle oocyte pools.
database	entry	term	pathway_or_ontology	number_DEG_in_entry	p_value	Benjamini	ensembl_gene_id	gene_name	gene_regulation_small_vs_spont
DAVID	bta00190	Oxidative phosphorylation	KEGG_pathway	14	3.4e-12	2.9e-10	ENSBTAG00000043584	ATP synthase F0 subunit 6(ATP6)	UP
DAVID	bta00190	Oxidative phosphorylation	KEGG_pathway	14	3.4e-12	2.9e-10	ENSBTAG00000014553	ATPase H+ transporting V0 subunit d1(ATP6V0D1)	DOWN
DAVID	bta00190	Oxidative phosphorylation	KEGG_pathway	14	3.4e-12	2.9e-10	ENSBTAG00000043558	NADH dehydrogenase subunit 1(ND1)	UP
DAVID	bta00190	Oxidative phosphorylation	KEGG_pathway	14	3.4e-12	2.9e-10	ENSBTAG00000043568	NADH dehydrogenase subunit 3(ND3)	UP
DAVID	bta00190	Oxidative phosphorylation	KEGG_pathway	14	3.4e-12	2.9e-10	ENSBTAG00000043577	NADH dehydrogenase subunit 4(ND4)	UP
DAVID	bta00190	Oxidative phosphorylation	KEGG_pathway	14	3.4e-12	2.9e-10	ENSBTAG00000043559	NADH dehydrogenase subunit 4L(ND4L)	UP
DAVID	bta00190	Oxidative phosphorylation	KEGG_pathway	14	3.4e-12	2.9e-10	ENSBTAG00000043563	NADH dehydrogenase subunit 5(ND5)	UP
DAVID	bta00190	Oxidative phosphorylation	KEGG_pathway	14	3.4e-12	2.9e-10	ENSBTAG00000043546	NADH dehydrogenase subunit 6(ND6)	UP
DAVID	bta00190	Oxidative phosphorylation	KEGG_pathway	14	3.4e-12	2.9e-10	ENSBTAG00000046319	NADH:ubiquinone oxidoreductase subunit A7(NDUFA7)	DOWN
DAVID	bta00190	Oxidative phosphorylation	KEGG_pathway	14	3.4e-12	2.9e-10	ENSBTAG00000004295	NADH:ubiquinone oxidoreductase subunit A8(NDUFA8)	DOWN
DAVID	bta00190	Oxidative phosphorylation	KEGG_pathway	14	3.4e-12	2.9e-10	ENSBTAG00000043550	cytochrome b(CYTB)	UP
DAVID	bta00190	Oxidative phosphorylation	KEGG_pathway	14	3.4e-12	2.9e-10	ENSBTAG00000043561	cytochrome c oxidase subunit I(COX1)	UP
DAVID	bta00190	Oxidative phosphorylation	KEGG_pathway	14	3.4e-12	2.9e-10	ENSBTAG00000012788	cytochrome c oxidase subunit VIa polypeptide 1(COX6A1)	DOWN
DAVID	bta00190	Oxidative phosphorylation	KEGG_pathway	14	3.4e-12	2.9e-10	ENSBTAG00000018542	cytochrome c oxidase subunit Vb(COX5B)	DOWN
DAVID	bta01100	Metabolic pathways	KEGG_pathway	22	1.4e-05	0.00041	ENSBTAG00000043584	ATP synthase F0 subunit 6(ATP6)	UP
DAVID	bta01100	Metabolic pathways	KEGG_pathway	22	1.4e-05	0.00041	ENSBTAG00000014553	ATPase H+ transporting V0 subunit d1(ATP6V0D1)	DOWN
DAVID	bta01100	Metabolic pathways	KEGG_pathway	22	1.4e-05	0.00041	ENSBTAG00000017017	CTP synthase 2(CTPS2)	DOWN
DAVID	bta01100	Metabolic pathways	KEGG_pathway	22	1.4e-05	0.00041	ENSBTAG00000043558	NADH dehydrogenase subunit 1(ND1)	UP
DAVID	bta01100	Metabolic pathways	KEGG_pathway	22	1.4e-05	0.00041	ENSBTAG00000043568	NADH dehydrogenase subunit 3(ND3)	UP
DAVID	bta01100	Metabolic pathways	KEGG_pathway	22	1.4e-05	0.00041	ENSBTAG00000043577	NADH dehydrogenase subunit 4(ND4)	UP
DAVID	bta01100	Metabolic pathways	KEGG_pathway	22	1.4e-05	0.00041	ENSBTAG00000043559	NADH dehydrogenase subunit 4L(ND4L)	UP
DAVID	bta01100	Metabolic pathways	KEGG_pathway	22	1.4e-05	0.00041	ENSBTAG00000043563	NADH dehydrogenase subunit 5(ND5)	UP
DAVID	bta01100	Metabolic pathways	KEGG_pathway	22	1.4e-05	0.00041	ENSBTAG00000043546	NADH dehydrogenase subunit 6(ND6)	UP
DAVID	bta01100	Metabolic pathways	KEGG_pathway	22	1.4e-05	0.00041	ENSBTAG00000046319	NADH:ubiquinone oxidoreductase subunit A7(NDUFA7)	DOWN
DAVID	bta01100	Metabolic pathways	KEGG_pathway	22	1.4e-05	0.00041	ENSBTAG00000004295	NADH:ubiquinone oxidoreductase subunit A8(NDUFA8)	DOWN
DAVID	bta01100	Metabolic pathways	KEGG_pathway	22	1.4e-05	0.00041	ENSBTAG00000007690	alanine--glyoxylate aminotransferase 2(AGXT2)	DOWN
DAVID	bta01100	Metabolic pathways	KEGG_pathway	22	1.4e-05	0.00041	ENSBTAG00000018688	carbonyl reductase 3(CBR3)	DOWN
DAVID	bta01100	Metabolic pathways	KEGG_pathway	22	1.4e-05	0.00041	ENSBTAG00000043550	cytochrome b(CYTB)	UP
DAVID	bta01100	Metabolic pathways	KEGG_pathway	22	1.4e-05	0.00041	ENSBTAG00000043561	cytochrome c oxidase subunit I(COX1)	UP
DAVID	bta01100	Metabolic pathways	KEGG_pathway	22	1.4e-05	0.00041	ENSBTAG00000012788	cytochrome c oxidase subunit VIa polypeptide 1(COX6A1)	DOWN
DAVID	bta01100	Metabolic pathways	KEGG_pathway	22	1.4e-05	0.00041	ENSBTAG00000018542	cytochrome c oxidase subunit Vb(COX5B)	DOWN
DAVID	bta01100	Metabolic pathways	KEGG_pathway	22	1.4e-05	0.00041	ENSBTAG00000033679	holocarboxylase synthetase(HLCS)	DOWN
DAVID	bta01100	Metabolic pathways	KEGG_pathway	22	1.4e-05	0.00041	ENSBTAG00000020040	lysophosphatidylcholine acyltransferase 4(LPCAT4)	DOWN
DAVID	bta01100	Metabolic pathways	KEGG_pathway	22	1.4e-05	0.00041	ENSBTAG00000009462	malate dehydrogenase 2(MDH2)	DOWN
DAVID	bta01100	Metabolic pathways	KEGG_pathway	22	1.4e-05	0.00041	ENSBTAG00000017680	nitric oxide synthase 3(NOS3)	UP
DAVID	bta01100	Metabolic pathways	KEGG_pathway	22	1.4e-05	0.00041	ENSBTAG00000005304	spermidine synthase(SRM)	UP
DAVID	GO:0042773	ATP synthesis coupled electron transport	GOTERM_BP_DIRECT	4	8.1e-06	0.0039	NSBTAG00000043577	NADH dehydrogenase subunit 4(ND4)	UP
DAVID	GO:0042773	ATP synthesis coupled electron transport	GOTERM_BP_DIRECT	4	8.1e-06	0.0039	ENSBTAG00000043559	NADH dehydrogenase subunit 4L(ND4L)	UP
DAVID	GO:0042773	ATP synthesis coupled electron transport	GOTERM_BP_DIRECT	4	8.1e-06	0.0039	ENSBTAG00000043563	NADH dehydrogenase subunit 5(ND5)	UP
DAVID	GO:0042773	ATP synthesis coupled electron transport	GOTERM_BP_DIRECT	4	8.1e-06	0.0039	ENSBTAG00000046319	NADH:ubiquinone oxidoreductase subunit A7(NDUFA7)	DOWN
DAVID	GO:0005747	mitochondrial respiratory chain complex I	GOTERM_CC_DIRECT	7	8.1e-07	0.00012	ENSBTAG00000043558	NADH dehydrogenase subunit 1(ND1)	UP
DAVID	GO:0005747	mitochondrial respiratory chain complex I	GOTERM_CC_DIRECT	7	8.1e-07	0.00012	ENSBTAG00000043568	NADH dehydrogenase subunit 3(ND3)	UP
DAVID	GO:0005747	mitochondrial respiratory chain complex I	GOTERM_CC_DIRECT	7	8.1e-07	0.00012	ENSBTAG00000043577	NADH dehydrogenase subunit 4(ND4)	UP
DAVID	GO:0005747	mitochondrial respiratory chain complex I	GOTERM_CC_DIRECT	7	8.1e-07	0.00012	ENSBTAG00000043559	NADH dehydrogenase subunit 4L(ND4L)	UP
DAVID	GO:0005747	mitochondrial respiratory chain complex I	GOTERM_CC_DIRECT	7	8.1e-07	0.00012	ENSBTAG00000043563	NADH dehydrogenase subunit 5(ND5)	UP
DAVID	GO:0005747	mitochondrial respiratory chain complex I	GOTERM_CC_DIRECT	7	8.1e-07	0.00012	ENSBTAG00000046319	NADH:ubiquinone oxidoreductase subunit A7(NDUFA7)	DOWN
DAVID	GO:0005747	mitochondrial respiratory chain complex I	GOTERM_CC_DIRECT	7	8.1e-07	0.00012	ENSBTAG00000004295	NADH:ubiquinone oxidoreductase subunit A8(NDUFA8)	DOWN
DAVID	GO:0070469	respiratory chain	GOTERM_CC_DIRECT	5	2.8e-06	0.0002	ENSBTAG00000043568	NADH dehydrogenase subunit 3(ND3)	UP
DAVID	GO:0070469	respiratory chain	GOTERM_CC_DIRECT	5	2.8e-06	0.0002	ENSBTAG00000043563	NADH dehydrogenase subunit 5(ND5)	UP
DAVID	GO:0070469	respiratory chain	GOTERM_CC_DIRECT	5	2.8e-06	0.0002	ENSBTAG00000043546	NADH dehydrogenase subunit 6(ND6)	UP
DAVID	GO:0070469	respiratory chain	GOTERM_CC_DIRECT	5	2.8e-06	0.0002	ENSBTAG00000043550	cytochrome b(CYTB)	UP
DAVID	GO:0070469	respiratory chain	GOTERM_CC_DIRECT	5	2.8e-06	0.0002	ENSBTAG00000043561	cytochrome c oxidase subunit I(COX1)	UP
DAVID	GO:0005743	mitochondrial inner membrane	GOTERM_CC_DIRECT	12	5.6e-06	0.00027	ENSBTAG00000043584	ATP synthase F0 subunit 6(ATP6)	UP
DAVID	GO:0005743	mitochondrial inner membrane	GOTERM_CC_DIRECT	12	5.6e-06	0.00027	ENSBTAG00000015639	Era like 12S mitochondrial rRNA chaperone 1(ERAL1)	DOWN
DAVID	GO:0005743	mitochondrial inner membrane	GOTERM_CC_DIRECT	12	5.6e-06	0.00027	ENSBTAG00000043558	NADH dehydrogenase subunit 1(ND1)	UP
DAVID	GO:0005743	mitochondrial inner membrane	GOTERM_CC_DIRECT	12	5.6e-06	0.00027	ENSBTAG00000043563	NADH dehydrogenase subunit 5(ND5)	UP
DAVID	GO:0005743	mitochondrial inner membrane	GOTERM_CC_DIRECT	12	5.6e-06	0.00027	ENSBTAG00000046319	NADH:ubiquinone oxidoreductase subunit A7(NDUFA7)	DOWN
DAVID	GO:0005743	mitochondrial inner membrane	GOTERM_CC_DIRECT	12	5.6e-06	0.00027	ENSBTAG00000043550	cytochrome b(CYTB)	UP
DAVID	GO:0005743	mitochondrial inner membrane	GOTERM_CC_DIRECT	12	5.6e-06	0.00027	ENSBTAG00000043561	cytochrome c oxidase subunit I(COX1)	UP
DAVID	GO:0005743	mitochondrial inner membrane	GOTERM_CC_DIRECT	12	5.6e-06	0.00027	ENSBTAG00000009462	malate dehydrogenase 2(MDH2)	DOWN
DAVID	GO:0005743	mitochondrial inner membrane	GOTERM_CC_DIRECT	12	5.6e-06	0.00027	ENSBTAG00000010715	mitochondrial ribosomal protein L37(MRPL37)	DOWN
DAVID	GO:0005743	mitochondrial inner membrane	GOTERM_CC_DIRECT	12	5.6e-06	0.00027	ENSBTAG00000008347	mitochondrial ribosomal protein L48(MRPL48)	DOWN
DAVID	GO:0005743	mitochondrial inner membrane	GOTERM_CC_DIRECT	12	5.6e-06	0.00027	ENSBTAG00000014442	mitochondrial ribosome associated GTPase 2(MTG2)	DOWN
DAVID	GO:0005743	mitochondrial inner membrane	GOTERM_CC_DIRECT	12	5.6e-06	0.00027	ENSBTAG00000014536	sideroflexin 1(SFXN1)	DOWN
DAVID	GO:0008137	NADH dehydrogenase (ubiquinone) activity	GOTERM_MF_DIRECT	8	2.7e-09	4.5e-07	ENSBTAG00000043558	NADH dehydrogenase subunit 1(ND1)	UP
DAVID	GO:0008137	NADH dehydrogenase (ubiquinone) activity	GOTERM_MF_DIRECT	8	2.7e-09	4.5e-07	ENSBTAG00000043568	NADH dehydrogenase subunit 3(ND3)	UP
DAVID	GO:0008137	NADH dehydrogenase (ubiquinone) activity	GOTERM_MF_DIRECT	8	2.7e-09	4.5e-07	ENSBTAG00000043577	NADH dehydrogenase subunit 4(ND4)	UP
DAVID	GO:0008137	NADH dehydrogenase (ubiquinone) activity	GOTERM_MF_DIRECT	8	2.7e-09	4.5e-07	ENSBTAG00000043559	NADH dehydrogenase subunit 4L(ND4L)	UP
DAVID	GO:0008137	NADH dehydrogenase (ubiquinone) activity	GOTERM_MF_DIRECT	8	2.7e-09	4.5e-07	ENSBTAG00000043563	NADH dehydrogenase subunit 5(ND5)	UP
DAVID	GO:0008137	NADH dehydrogenase (ubiquinone) activity	GOTERM_MF_DIRECT	8	2.7e-09	4.5e-07	ENSBTAG00000043546	NADH dehydrogenase subunit 6(ND6)	UP
DAVID	GO:0008137	NADH dehydrogenase (ubiquinone) activity	GOTERM_MF_DIRECT	8	2.7e-09	4.5e-07	ENSBTAG00000046319	NADH:ubiquinone oxidoreductase subunit A7(NDUFA7)	DOWN
DAVID	GO:0008137	NADH dehydrogenase (ubiquinone) activity	GOTERM_MF_DIRECT	8	2.7e-09	4.5e-07	ENSBTAG00000004295	NADH:ubiquinone oxidoreductase subunit A8(NDUFA8)	DOWN
GO	GO:0042773	ATP synthesis coupled electron transport	GO_biological_process_complete	6	2.74e-06	0.0095	ENSBTAG00000043550	cytochrome b(CYTB)	UP
GO	GO:0042773	ATP synthesis coupled electron transport	GO_biological_process_complete	6	2.74e-06	0.0095	ENSBTAG00000012788	cytochrome c oxidase subunit VIa polypeptide 1(COX6A1)	DOWN
GO	GO:0042773	ATP synthesis coupled electron transport	GO_biological_process_complete	6	2.74e-06	0.0095	ENSBTAG00000043559	NADH dehydrogenase subunit 4L(ND4L)	UP
GO	GO:0042773	ATP synthesis coupled electron transport	GO_biological_process_complete	6	2.74e-06	0.0095	ENSBTAG00000004295	NADH:ubiquinone oxidoreductase subunit A8(NDUFA8)	DOWN
GO	GO:0042773	ATP synthesis coupled electron transport	GO_biological_process_complete	6	2.74e-06	0.0095	ENSBTAG00000043563	NADH dehydrogenase subunit 5(ND5)	UP
GO	GO:0042773	ATP synthesis coupled electron transport	GO_biological_process_complete	6	2.74e-06	0.0095	ENSBTAG00000043577	NADH dehydrogenase subunit 4(ND4)	UP
GO	GO:0006119	oxidative phosphorylation (GO:0006119)	GO_biological_process_complete	7	1.38e-06	0.0191	ENSBTAG00000043550	cytochrome b(CYTB)	UP
GO	GO:0006119	oxidative phosphorylation (GO:0006119)	GO_biological_process_complete	7	1.38e-06	0.0191	ENSBTAG00000043561	cytochrome c oxidase subunit I(COX1)	UP
GO	GO:0006119	oxidative phosphorylation (GO:0006119)	GO_biological_process_complete	7	1.38e-06	0.0191	ENSBTAG00000012788	cytochrome c oxidase subunit VIa polypeptide 1(COX6A1)	DOWN
GO	GO:0006119	oxidative phosphorylation (GO:0006119)	GO_biological_process_complete	7	1.38e-06	0.0191	ENSBTAG00000043559	NADH dehydrogenase subunit 4L(ND4L)	UP
GO	GO:0006119	oxidative phosphorylation (GO:0006119)	GO_biological_process_complete	7	1.38e-06	0.0191	ENSBTAG00000004295	NADH:ubiquinone oxidoreductase subunit A8(NDUFA8)	DOWN
GO	GO:0006119	oxidative phosphorylation (GO:0006119)	GO_biological_process_complete	7	1.38e-06	0.0191	ENSBTAG00000043563	NADH dehydrogenase subunit 5(ND5)	UP
GO	GO:0006119	oxidative phosphorylation (GO:0006119)	GO_biological_process_complete	7	1.38e-06	0.0191	ENSBTAG00000043577	NADH dehydrogenase subunit 4(ND4)	UP
GO	GO:0022904	respiratory electron transport chain	GO_biological_process_complete	6	1.68e-05	0.0465	ENSBTAG00000043550	cytochrome b(CYTB)	UP
GO	GO:0022904	respiratory electron transport chain	GO_biological_process_complete	6	1.68e-05	0.0465	ENSBTAG00000012788	cytochrome c oxidase subunit VIa polypeptide 1(COX6A1)	DOWN
GO	GO:0022904	respiratory electron transport chain	GO_biological_process_complete	6	1.68e-05	0.0465	ENSBTAG00000043559	NADH dehydrogenase subunit 4L(ND4L)	UP
GO	GO:0022904	respiratory electron transport chain	GO_biological_process_complete	6	1.68e-05	0.0465	ENSBTAG00000004295	NADH:ubiquinone oxidoreductase subunit A8(NDUFA8)	DOWN
GO	GO:0022904	respiratory electron transport chain	GO_biological_process_complete	6	1.68e-05	0.0465	ENSBTAG00000043563	NADH dehydrogenase subunit 5(ND5)	UP
GO	GO:0022904	respiratory electron transport chain	GO_biological_process_complete	6	1.68e-05	0.0465	ENSBTAG00000043577	NADH dehydrogenase subunit 4(ND4)	UP
GO	GO:0045333	cellular respiration	GO_biological_process_complete	8	2.37e-06	0.011	ENSBTAG00000043550	cytochrome b(CYTB)	UP
GO	GO:0045333	cellular respiration	GO_biological_process_complete	8	2.37e-06	0.011	ENSBTAG00000043561	cytochrome c oxidase subunit I(COX1)	UP
GO	GO:0045333	cellular respiration	GO_biological_process_complete	8	2.37e-06	0.011	ENSBTAG00000012788	cytochrome c oxidase subunit VIa polypeptide 1(COX6A1)	DOWN
GO	GO:0045333	cellular respiration	GO_biological_process_complete	8	2.37e-06	0.011	ENSBTAG00000043559	NADH dehydrogenase subunit 4L(ND4L)	UP
GO	GO:0045333	cellular respiration	GO_biological_process_complete	8	2.37e-06	0.011	ENSBTAG00000004295	NADH:ubiquinone oxidoreductase subunit A8(NDUFA8)	DOWN
GO	GO:0045333	cellular respiration	GO_biological_process_complete	8	2.37e-06	0.011	ENSBTAG00000009462	malate dehydrogenase 2(MDH2)	DOWN
GO	GO:0045333	cellular respiration	GO_biological_process_complete	8	2.37e-06	0.011	ENSBTAG00000043563	NADH dehydrogenase subunit 5(ND5)	UP
GO	GO:0045333	cellular respiration	GO_biological_process_complete	8	2.37e-06	0.011	ENSBTAG00000043577	NADH dehydrogenase subunit 4(ND4)	UP
GO	GO:0046034	ATP metabolic process	GO_biological_process_complete	9	1.89e-06	0.0131	ENSBTAG00000043550	cytochrome b(CYTB)	UP
GO	GO:0046035	ATP metabolic process	GO_biological_process_complete	9	1.89e-06	1.0131	ENSBTAG00000043561	cytochrome c oxidase subunit I(COX1)	UP
GO	GO:0046036	ATP metabolic process	GO_biological_process_complete	9	1.89e-06	2.0131	ENSBTAG00000012788	cytochrome c oxidase subunit VIa polypeptide 1(COX6A1)	DOWN
GO	GO:0046037	ATP metabolic process	GO_biological_process_complete	9	1.89e-06	3.0131	ENSBTAG00000043559	NADH dehydrogenase subunit 4L(ND4L)	UP
GO	GO:0046038	ATP metabolic process	GO_biological_process_complete	9	1.89e-06	4.0131	ENSBTAG00000043584	ATP synthase F0 subunit 6(ATP6)	UP
GO	GO:0046039	ATP metabolic process	GO_biological_process_complete	9	1.89e-06	5.0131	ENSBTAG00000004295	NADH:ubiquinone oxidoreductase subunit A8(NDUFA8)	DOWN
GO	GO:0046040	ATP metabolic process	GO_biological_process_complete	9	1.89e-06	6.0131	ENSBTAG00000043563	NADH dehydrogenase subunit 5(ND5)	UP
GO	GO:0046041	ATP metabolic process	GO_biological_process_complete	9	1.89e-06	7.0131	ENSBTAG00000037625	Phosphoglycerate mutase	UP
GO	GO:0046042	ATP metabolic process	GO_biological_process_complete	9	1.89e-06	8.0131	ENSBTAG00000043577	NADH dehydrogenase subunit 4(ND4)	UP
GO	GO:0050136	NADH dehydrogenase (quinone) activity	GO_molecular_function_complete	6	1.16e-07	0.000476	ENSBTAG00000043568	NADH dehydrogenase subunit 3(ND3)	UP
GO	GO:0050136	NADH dehydrogenase (quinone) activity	GO_molecular_function_complete	6	1.16e-07	0.000476	ENSBTAG00000043558	NADH dehydrogenase subunit 1(ND1)	UP
GO	GO:0050136	NADH dehydrogenase (quinone) activity	GO_molecular_function_complete	6	1.16e-07	0.000476	ENSBTAG00000043559	NADH dehydrogenase subunit 4L(ND4L)	UP
GO	GO:0050136	NADH dehydrogenase (quinone) activity	GO_molecular_function_complete	6	1.16e-07	0.000476	ENSBTAG00000043563	NADH dehydrogenase subunit 5(ND5)	UP
GO	GO:0050136	NADH dehydrogenase (quinone) activity	GO_molecular_function_complete	6	1.16e-07	0.000476	ENSBTAG00000043577	NADH dehydrogenase subunit 4(ND4)	UP
GO	GO:0050136	NADH dehydrogenase (quinone) activity	GO_molecular_function_complete	6	1.16e-07	0.000476	ENSBTAG00000043546	NADH dehydrogenase subunit 6(ND6)	UP
GO	GO:0008137	NADH dehydrogenase (ubiquinone) activity	GO_molecular_function_complete	6	1.16e-07	0.000238	ENSBTAG00000043568	NADH dehydrogenase subunit 3(ND3)	UP
GO	GO:0008137	NADH dehydrogenase (ubiquinone) activity	GO_molecular_function_complete	6	1.16e-07	0.000238	ENSBTAG00000043558	NADH dehydrogenase subunit 1(ND1)	UP
GO	GO:0008137	NADH dehydrogenase (ubiquinone) activity	GO_molecular_function_complete	6	1.16e-07	0.000238	ENSBTAG00000043559	NADH dehydrogenase subunit 4L(ND4L)	UP
GO	GO:0008137	NADH dehydrogenase (ubiquinone) activity	GO_molecular_function_complete	6	1.16e-07	0.000238	ENSBTAG00000043563	NADH dehydrogenase subunit 5(ND5)	UP
GO	GO:0008137	NADH dehydrogenase (ubiquinone) activity	GO_molecular_function_complete	6	1.16e-07	0.000238	ENSBTAG00000043577	NADH dehydrogenase subunit 4(ND4)	UP
GO	GO:0008137	NADH dehydrogenase (ubiquinone) activity	GO_molecular_function_complete	6	1.16e-07	0.000238	ENSBTAG00000043546	NADH dehydrogenase subunit 6(ND6)	UP
GO	GO:0003954	NADH dehydrogenase activity	GO_molecular_function_complete	6	1.75e-07	0.000239	ENSBTAG00000043568	NADH dehydrogenase subunit 3(ND3)	UP
GO	GO:0003954	NADH dehydrogenase activity	GO_molecular_function_complete	6	1.75e-07	0.000239	ENSBTAG00000043558	NADH dehydrogenase subunit 1(ND1)	UP
GO	GO:0003954	NADH dehydrogenase activity	GO_molecular_function_complete	6	1.75e-07	0.000239	ENSBTAG00000043559	NADH dehydrogenase subunit 4L(ND4L)	UP
GO	GO:0003954	NADH dehydrogenase activity	GO_molecular_function_complete	6	1.75e-07	0.000239	ENSBTAG00000043563	NADH dehydrogenase subunit 5(ND5)	UP
GO	GO:0003954	NADH dehydrogenase activity	GO_molecular_function_complete	6	1.75e-07	0.000239	ENSBTAG00000043577	NADH dehydrogenase subunit 4(ND4)	UP
GO	GO:0003954	NADH dehydrogenase activity	GO_molecular_function_complete	6	1.75e-07	0.000239	ENSBTAG00000043546	NADH dehydrogenase subunit 6(ND6)	UP
GO	GO:0003955	NAD(P)H dehydrogenase (quinone) activity	GO_molecular_function_complete	6	2.13e-07	0.000218	ENSBTAG00000043568	NADH dehydrogenase subunit 3(ND3)	UP
GO	GO:0003955	NAD(P)H dehydrogenase (quinone) activity	GO_molecular_function_complete	6	2.13e-07	0.000218	ENSBTAG00000043558	NADH dehydrogenase subunit 1(ND1)	UP
GO	GO:0003955	NAD(P)H dehydrogenase (quinone) activity	GO_molecular_function_complete	6	2.13e-07	0.000218	ENSBTAG00000043559	NADH dehydrogenase subunit 4L(ND4L)	UP
GO	GO:0003955	NAD(P)H dehydrogenase (quinone) activity	GO_molecular_function_complete	6	2.13e-07	0.000218	ENSBTAG00000043563	NADH dehydrogenase subunit 5(ND5)	UP
GO	GO:0003955	NAD(P)H dehydrogenase (quinone) activity	GO_molecular_function_complete	6	2.13e-07	0.000218	ENSBTAG00000043577	NADH dehydrogenase subunit 4(ND4)	UP
GO	GO:0003955	NAD(P)H dehydrogenase (quinone) activity	GO_molecular_function_complete	6	2.13e-07	0.000218	ENSBTAG00000043546	NADH dehydrogenase subunit 6(ND6)	UP
GO	GO:0016655	oxidoreductase activity, acting on NAD(P)H, quinone or similar compound as acceptor	GO_molecular_function_complete	6	4.36e-07	0.000356	ENSBTAG00000043568	NADH dehydrogenase subunit 3(ND3)	UP
GO	GO:0016655	oxidoreductase activity, acting on NAD(P)H, quinone or similar compound as acceptor	GO_molecular_function_complete	6	4.36e-07	0.000356	ENSBTAG00000043558	NADH dehydrogenase subunit 1(ND1)	UP
GO	GO:0016655	oxidoreductase activity, acting on NAD(P)H, quinone or similar compound as acceptor	GO_molecular_function_complete	6	4.36e-07	0.000356	ENSBTAG00000043559	NADH dehydrogenase subunit 4L(ND4L)	UP
GO	GO:0016655	oxidoreductase activity, acting on NAD(P)H, quinone or similar compound as acceptor	GO_molecular_function_complete	6	4.36e-07	0.000356	ENSBTAG00000043563	NADH dehydrogenase subunit 5(ND5)	UP
GO	GO:0016655	oxidoreductase activity, acting on NAD(P)H, quinone or similar compound as acceptor	GO_molecular_function_complete	6	4.36e-07	0.000356	ENSBTAG00000043577	NADH dehydrogenase subunit 4(ND4)	UP
GO	GO:0016655	oxidoreductase activity, acting on NAD(P)H, quinone or similar compound as acceptor	GO_molecular_function_complete	6	4.36e-07	0.000356	ENSBTAG00000043546	NADH dehydrogenase subunit 6(ND6)	UP
GO	GO:0016651	oxidoreductase activity, acting on NAD(P)H	GO_molecular_function_complete	7	2.01e-06	0.00137	ENSBTAG00000017680	nitric oxide synthase 3(NOS3)	UP
GO	GO:0016651	oxidoreductase activity, acting on NAD(P)H	GO_molecular_function_complete	7	2.01e-06	0.00137	ENSBTAG00000043568	NADH dehydrogenase subunit 3(ND3)	UP
GO	GO:0016651	oxidoreductase activity, acting on NAD(P)H	GO_molecular_function_complete	7	2.01e-06	0.00137	ENSBTAG00000043558	NADH dehydrogenase subunit 1(ND1)	UP
GO	GO:0016651	oxidoreductase activity, acting on NAD(P)H	GO_molecular_function_complete	7	2.01e-06	0.00137	ENSBTAG00000043559	NADH dehydrogenase subunit 4L(ND4L)	UP
GO	GO:0016651	oxidoreductase activity, acting on NAD(P)H	GO_molecular_function_complete	7	2.01e-06	0.00137	ENSBTAG00000043563	NADH dehydrogenase subunit 5(ND5)	UP
GO	GO:0016651	oxidoreductase activity, acting on NAD(P)H	GO_molecular_function_complete	7	2.01e-06	0.00137	ENSBTAG00000043577	NADH dehydrogenase subunit 4(ND4)	UP
GO	GO:0016651	oxidoreductase activity, acting on NAD(P)H	GO_molecular_function_complete	7	2.01e-06	0.00137	ENSBTAG00000043546	NADH dehydrogenase subunit 6(ND6)	UP
GO	GO:0016491	oxidoreductase activity	GO_molecular_function_complete	15	5.87e-05	0.0343	ENSBTAG00000018688	carbonyl reductase 3(CBR3)	DOWN
GO	GO:0016491	oxidoreductase activity	GO_molecular_function_complete	15	5.87e-05	0.0343	ENSBTAG00000043550	cytochrome b(CYTB)	UP
GO	GO:0016491	oxidoreductase activity	GO_molecular_function_complete	15	5.87e-05	0.0343	ENSBTAG00000043561	cytochrome c oxidase subunit I(COX1)	UP
GO	GO:0016491	oxidoreductase activity	GO_molecular_function_complete	15	5.87e-05	0.0343	ENSBTAG00000017680	nitric oxide synthase 3(NOS3)	UP
GO	GO:0016491	oxidoreductase activity	GO_molecular_function_complete	15	5.87e-05	0.0343	ENSBTAG00000012788	cytochrome c oxidase subunit VIa polypeptide 1(COX6A1)	DOWN
GO	GO:0016491	oxidoreductase activity	GO_molecular_function_complete	15	5.87e-05	0.0343	ENSBTAG00000043568	NADH dehydrogenase subunit 3(ND3)	UP
GO	GO:0016491	oxidoreductase activity	GO_molecular_function_complete	15	5.87e-05	0.0343	ENSBTAG00000043558	NADH dehydrogenase subunit 1(ND1)	UP
GO	GO:0016491	oxidoreductase activity	GO_molecular_function_complete	15	5.87e-05	0.0343	ENSBTAG00000008648	Peroxiredoxin-5 (PRDX5)	DOWN
GO	GO:0016491	oxidoreductase activity	GO_molecular_function_complete	15	5.87e-05	0.0343	ENSBTAG00000019530	Bifunctional peptidase and arginyl-hydroxylase JMJD5 (KDM8)	UP
GO	GO:0016491	oxidoreductase activity	GO_molecular_function_complete	15	5.87e-05	0.0343	ENSBTAG00000043559	NADH dehydrogenase subunit 4L(ND4L)	UP
GO	GO:0016491	oxidoreductase activity	GO_molecular_function_complete	15	5.87e-05	0.0343	ENSBTAG00000009462	malate dehydrogenase 2(MDH2)	DOWN
GO	GO:0016491	oxidoreductase activity	GO_molecular_function_complete	15	5.87e-05	0.0343	ENSBTAG00000043563	NADH dehydrogenase subunit 5(ND5)	UP
GO	GO:0016491	oxidoreductase activity	GO_molecular_function_complete	15	5.87e-05	0.0343	ENSBTAG00000043577	NADH dehydrogenase subunit 4(ND4)	UP
GO	GO:0016491	oxidoreductase activity	GO_molecular_function_complete	15	5.87e-05	0.0343	ENSBTAG00000025540	Alpha-ketoglutarate-dependent dioxygenase alkB homolog 7(ALKBH7)	DOWN
GO	GO:0016491	oxidoreductase activity	GO_molecular_function_complete	15	5.87e-05	0.0343	ENSBTAG00000043546	NADH dehydrogenase subunit 6(ND6)	UP
GO	GO:0045271	respiratory chain complex I	GO_cellular_component_complete	6	3.88e-06	0.000527	ENSBTAG00000043568	NADH dehydrogenase subunit 3(ND3)	UP
GO	GO:0045271	respiratory chain complex I	GO_cellular_component_complete	6	3.88e-06	0.000527	ENSBTAG00000043558	NADH dehydrogenase subunit 1(ND1)	UP
GO	GO:0045271	respiratory chain complex I	GO_cellular_component_complete	6	3.88e-06	0.000527	ENSBTAG00000043559	NADH dehydrogenase subunit 4L(ND4L)	UP
GO	GO:0045271	respiratory chain complex I	GO_cellular_component_complete	6	3.88e-06	0.000527	ENSBTAG00000004295	NADH:ubiquinone oxidoreductase subunit A8(NDUFA8)	DOWN
GO	GO:0045271	respiratory chain complex I	GO_cellular_component_complete	6	3.88e-06	0.000527	ENSBTAG00000043563	NADH dehydrogenase subunit 5(ND5)	UP
GO	GO:0045271	respiratory chain complex I	GO_cellular_component_complete	6	3.88e-06	0.000527	ENSBTAG00000043577	NADH dehydrogenase subunit 4(ND4)	UP
GO	GO:0030964	NADH dehydrogenase complex	GO_cellular_component_complete	6	3.88e-06	0.00049	ENSBTAG00000043568	NADH dehydrogenase subunit 3(ND3)	UP
GO	GO:0030964	NADH dehydrogenase complex	GO_cellular_component_complete	6	3.88e-06	0.00049	ENSBTAG00000043558	NADH dehydrogenase subunit 1(ND1)	UP
GO	GO:0030964	NADH dehydrogenase complex	GO_cellular_component_complete	6	3.88e-06	0.00049	ENSBTAG00000043559	NADH dehydrogenase subunit 4L(ND4L)	UP
GO	GO:0030964	NADH dehydrogenase complex	GO_cellular_component_complete	6	3.88e-06	0.00049	ENSBTAG00000004295	NADH:ubiquinone oxidoreductase subunit A8(NDUFA8)	DOWN
GO	GO:0030964	NADH dehydrogenase complex	GO_cellular_component_complete	6	3.88e-06	0.00049	ENSBTAG00000043563	NADH dehydrogenase subunit 5(ND5)	UP
GO	GO:0030964	NADH dehydrogenase complex	GO_cellular_component_complete	6	3.88e-06	0.00049	ENSBTAG00000043577	NADH dehydrogenase subunit 4(ND4)	UP
GO	GO:0005747	mitochondrial respiratory chain complex I	GO_cellular_component_complete	6	3.88e-06	0.000457	ENSBTAG00000043568	NADH dehydrogenase subunit 3(ND3)	UP
GO	GO:0005747	mitochondrial respiratory chain complex I	GO_cellular_component_complete	6	3.88e-06	0.000457	ENSBTAG00000043558	NADH dehydrogenase subunit 1(ND1)	UP
GO	GO:0005747	mitochondrial respiratory chain complex I	GO_cellular_component_complete	6	3.88e-06	0.000457	ENSBTAG00000043559	NADH dehydrogenase subunit 4L(ND4L)	UP
GO	GO:0005747	mitochondrial respiratory chain complex I	GO_cellular_component_complete	6	3.88e-06	0.000457	ENSBTAG00000004295	NADH:ubiquinone oxidoreductase subunit A8(NDUFA8)	DOWN
GO	GO:0005747	mitochondrial respiratory chain complex I	GO_cellular_component_complete	6	3.88e-06	0.000457	ENSBTAG00000043563	NADH dehydrogenase subunit 5(ND5)	UP
GO	GO:0005747	mitochondrial respiratory chain complex I	GO_cellular_component_complete	6	3.88e-06	0.000457	ENSBTAG00000043577	NADH dehydrogenase subunit 4(ND4)	UP
GO	GO:0005746	mitochondrial respirasome	GO_cellular_component_complete	9	1.41e-08	8.31e-06	ENSBTAG00000043550	cytochrome b(CYTB)	UP
GO	GO:0005746	mitochondrial respirasome	GO_cellular_component_complete	9	1.41e-08	8.31e-06	ENSBTAG00000043561	cytochrome c oxidase subunit I(COX1)	UP
GO	GO:0005746	mitochondrial respirasome	GO_cellular_component_complete	9	1.41e-08	8.31e-06	ENSBTAG00000012788	cytochrome c oxidase subunit VIa polypeptide 1(COX6A1)	DOWN
GO	GO:0005746	mitochondrial respirasome	GO_cellular_component_complete	9	1.41e-08	8.31e-06	ENSBTAG00000043568	NADH dehydrogenase subunit 3(ND3)	UP
GO	GO:0005746	mitochondrial respirasome	GO_cellular_component_complete	9	1.41e-08	8.31e-06	ENSBTAG00000043558	NADH dehydrogenase subunit 1(ND1)	UP
GO	GO:0005746	mitochondrial respirasome	GO_cellular_component_complete	9	1.41e-08	8.31e-06	ENSBTAG00000043559	NADH dehydrogenase subunit 4L(ND4L)	UP
GO	GO:0005746	mitochondrial respirasome	GO_cellular_component_complete	9	1.41e-08	8.31e-06	ENSBTAG00000004295	NADH:ubiquinone oxidoreductase subunit A8(NDUFA8)	DOWN
GO	GO:0005746	mitochondrial respirasome	GO_cellular_component_complete	9	1.41e-08	8.31e-06	ENSBTAG00000043563	NADH dehydrogenase subunit 5(ND5)	UP
GO	GO:0005746	mitochondrial respirasome	GO_cellular_component_complete	9	1.41e-08	8.31e-06	ENSBTAG00000043577	NADH dehydrogenase subunit 4(ND4)	UP
GO	GO:0098803	respiratory chain complex	GO_cellular_component_complete	9	1.96e-08	8.66e-06	ENSBTAG00000043550	cytochrome b(CYTB)	UP
GO	GO:0098803	respiratory chain complex	GO_cellular_component_complete	9	1.96e-08	8.66e-06	ENSBTAG00000043561	cytochrome c oxidase subunit I(COX1)	UP
GO	GO:0098803	respiratory chain complex	GO_cellular_component_complete	9	1.96e-08	8.66e-06	ENSBTAG00000012788	cytochrome c oxidase subunit VIa polypeptide 1(COX6A1)	DOWN
GO	GO:0098803	respiratory chain complex	GO_cellular_component_complete	9	1.96e-08	8.66e-06	ENSBTAG00000043568	NADH dehydrogenase subunit 3(ND3)	UP
GO	GO:0098803	respiratory chain complex	GO_cellular_component_complete	9	1.96e-08	8.66e-06	ENSBTAG00000043558	NADH dehydrogenase subunit 1(ND1)	UP
GO	GO:0098803	respiratory chain complex	GO_cellular_component_complete	9	1.96e-08	8.66e-06	ENSBTAG00000043559	NADH dehydrogenase subunit 4L(ND4L)	UP
GO	GO:0098803	respiratory chain complex	GO_cellular_component_complete	9	1.96e-08	8.66e-06	ENSBTAG00000004295	NADH:ubiquinone oxidoreductase subunit A8(NDUFA8)	DOWN
GO	GO:0098803	respiratory chain complex	GO_cellular_component_complete	9	1.96e-08	8.66e-06	ENSBTAG00000043563	NADH dehydrogenase subunit 5(ND5)	UP
GO	GO:0098803	respiratory chain complex	GO_cellular_component_complete	9	1.96e-08	8.66e-06	ENSBTAG00000043577	NADH dehydrogenase subunit 4(ND4)	UP
GO	GO:0070469	respirasome	GO_cellular_component_complete	10	4.13e-09	7.3e-06	ENSBTAG00000043550	cytochrome b(CYTB)	UP
GO	GO:0070469	respirasome	GO_cellular_component_complete	10	4.13e-09	7.3e-06	ENSBTAG00000043561	cytochrome c oxidase subunit I(COX1)	UP
GO	GO:0070469	respirasome	GO_cellular_component_complete	10	4.13e-09	7.3e-06	ENSBTAG00000012788	cytochrome c oxidase subunit VIa polypeptide 1(COX6A1)	DOWN
GO	GO:0070469	respirasome	GO_cellular_component_complete	10	4.13e-09	7.3e-06	ENSBTAG00000043568	NADH dehydrogenase subunit 3(ND3)	UP
GO	GO:0070469	respirasome	GO_cellular_component_complete	10	4.13e-09	7.3e-06	ENSBTAG00000043558	NADH dehydrogenase subunit 1(ND1)	UP
GO	GO:0070469	respirasome	GO_cellular_component_complete	10	4.13e-09	7.3e-06	ENSBTAG00000043559	NADH dehydrogenase subunit 4L(ND4L)	UP
GO	GO:0070469	respirasome	GO_cellular_component_complete	10	4.13e-09	7.3e-06	ENSBTAG00000004295	NADH:ubiquinone oxidoreductase subunit A8(NDUFA8)	DOWN
GO	GO:0070469	respirasome	GO_cellular_component_complete	10	4.13e-09	7.3e-06	ENSBTAG00000043563	NADH dehydrogenase subunit 5(ND5)	UP
GO	GO:0070469	respirasome	GO_cellular_component_complete	10	4.13e-09	7.3e-06	ENSBTAG00000043577	NADH dehydrogenase subunit 4(ND4)	UP
GO	GO:0070469	respirasome	GO_cellular_component_complete	10	4.13e-09	7.3e-06	ENSBTAG00000043546	NADH dehydrogenase subunit 6(ND6)	UP
GO	GO:0098800	inner mitochondrial membrane protein complex	GO_cellular_component_complete	11	9.54e-09	8.44e-06	ENSBTAG00000018496	translocase of inner mitochondrial membrane 17B (TIMM17B)	DOWN
GO	GO:0098800	inner mitochondrial membrane protein complex	GO_cellular_component_complete	11	9.54e-09	8.44e-06	ENSBTAG00000043550	cytochrome b(CYTB)	UP
GO	GO:0098800	inner mitochondrial membrane protein complex	GO_cellular_component_complete	11	9.54e-09	8.44e-06	ENSBTAG00000043561	cytochrome c oxidase subunit I(COX1)	UP
GO	GO:0098800	inner mitochondrial membrane protein complex	GO_cellular_component_complete	11	9.54e-09	8.44e-06	ENSBTAG00000012788	cytochrome c oxidase subunit VIa polypeptide 1(COX6A1)	DOWN
GO	GO:0098800	inner mitochondrial membrane protein complex	GO_cellular_component_complete	11	9.54e-09	8.44e-06	ENSBTAG00000043568	NADH dehydrogenase subunit 3(ND3)	UP
GO	GO:0098800	inner mitochondrial membrane protein complex	GO_cellular_component_complete	11	9.54e-09	8.44e-06	ENSBTAG00000043558	NADH dehydrogenase subunit 1(ND1)	UP
GO	GO:0098800	inner mitochondrial membrane protein complex	GO_cellular_component_complete	11	9.54e-09	8.44e-06	ENSBTAG00000043559	NADH dehydrogenase subunit 4L(ND4L)	UP
GO	GO:0098800	inner mitochondrial membrane protein complex	GO_cellular_component_complete	11	9.54e-09	8.44e-06	ENSBTAG00000043584	ATP synthase F0 subunit 6(ATP6)	UP
GO	GO:0098800	inner mitochondrial membrane protein complex	GO_cellular_component_complete	11	9.54e-09	8.44e-06	ENSBTAG00000004295	NADH:ubiquinone oxidoreductase subunit A8(NDUFA8)	DOWN
GO	GO:0098800	inner mitochondrial membrane protein complex	GO_cellular_component_complete	11	9.54e-09	8.44e-06	ENSBTAG00000043563	NADH dehydrogenase subunit 5(ND5)	UP
GO	GO:0098800	inner mitochondrial membrane protein complex	GO_cellular_component_complete	11	9.54e-09	8.44e-06	ENSBTAG00000043577	NADH dehydrogenase subunit 4(ND4)	UP
GO	GO:1990204	oxidoreductase complex	GO_cellular_component_complete	8	1.66e-06	0.000293	ENSBTAG00000043550	cytochrome b(CYTB)	UP
GO	GO:1990204	oxidoreductase complex	GO_cellular_component_complete	8	1.66e-06	0.000293	ENSBTAG00000043561	cytochrome c oxidase subunit I(COX1)	UP
GO	GO:1990204	oxidoreductase complex	GO_cellular_component_complete	8	1.66e-06	0.000293	ENSBTAG00000043568	NADH dehydrogenase subunit 3(ND3)	UP
GO	GO:1990204	oxidoreductase complex	GO_cellular_component_complete	8	1.66e-06	0.000293	ENSBTAG00000043558	NADH dehydrogenase subunit 1(ND1)	UP
GO	GO:1990204	oxidoreductase complex	GO_cellular_component_complete	8	1.66e-06	0.000293	ENSBTAG00000043559	NADH dehydrogenase subunit 4L(ND4L)	UP
GO	GO:1990204	oxidoreductase complex	GO_cellular_component_complete	8	1.66e-06	0.000293	ENSBTAG00000004295	NADH:ubiquinone oxidoreductase subunit A8(NDUFA8)	DOWN
GO	GO:1990204	oxidoreductase complex	GO_cellular_component_complete	8	1.66e-06	0.000293	ENSBTAG00000043563	NADH dehydrogenase subunit 5(ND5)	UP
GO	GO:1990204	oxidoreductase complex	GO_cellular_component_complete	8	1.66e-06	0.000293	ENSBTAG00000043577	NADH dehydrogenase subunit 4(ND4)	UP
GO	GO:0098798	mitochondrial protein complex	GO_cellular_component_complete	13	7.82e-08	2.31e-05	ENSBTAG00000008347	mitochondrial ribosomal protein L48(MRPL48)	DOWN
GO	GO:0098798	mitochondrial protein complex	GO_cellular_component_complete	13	7.82e-08	2.31e-05	ENSBTAG00000018496	translocase of inner mitochondrial membrane 17B (TIMM17B)	DOWN
GO	GO:0098798	mitochondrial protein complex	GO_cellular_component_complete	13	7.82e-08	2.31e-05	ENSBTAG00000043550	cytochrome b(CYTB)	UP
GO	GO:0098798	mitochondrial protein complex	GO_cellular_component_complete	13	7.82e-08	2.31e-05	ENSBTAG00000043561	cytochrome c oxidase subunit I(COX1)	UP
GO	GO:0098798	mitochondrial protein complex	GO_cellular_component_complete	13	7.82e-08	2.31e-05	ENSBTAG00000012788	cytochrome c oxidase subunit VIa polypeptide 1(COX6A1)	DOWN
GO	GO:0098798	mitochondrial protein complex	GO_cellular_component_complete	13	7.82e-08	2.31e-05	ENSBTAG00000043568	NADH dehydrogenase subunit 3(ND3)	UP
GO	GO:0098798	mitochondrial protein complex	GO_cellular_component_complete	13	7.82e-08	2.31e-05	ENSBTAG00000043558	NADH dehydrogenase subunit 1(ND1)	UP
GO	GO:0098798	mitochondrial protein complex	GO_cellular_component_complete	13	7.82e-08	2.31e-05	ENSBTAG00000010715	mitochondrial ribosomal protein L37(MRPL37)	DOWN
GO	GO:0098798	mitochondrial protein complex	GO_cellular_component_complete	13	7.82e-08	2.31e-05	ENSBTAG00000043559	NADH dehydrogenase subunit 4L(ND4L)	UP
GO	GO:0098798	mitochondrial protein complex	GO_cellular_component_complete	13	7.82e-08	2.31e-05	ENSBTAG00000043584	ATP synthase F0 subunit 6(ATP6)	UP
GO	GO:0098798	mitochondrial protein complex	GO_cellular_component_complete	13	7.82e-08	2.31e-05	ENSBTAG00000004295	NADH:ubiquinone oxidoreductase subunit A8(NDUFA8)	DOWN
GO	GO:0098798	mitochondrial protein complex	GO_cellular_component_complete	13	7.82e-08	2.31e-05	ENSBTAG00000043563	NADH dehydrogenase subunit 5(ND5)	UP
GO	GO:0098798	mitochondrial protein complex	GO_cellular_component_complete	13	7.82e-08	2.31e-05	ENSBTAG00000043577	NADH dehydrogenase subunit 4(ND4)	UP
GO	GO:0005743	mitochondrial inner membrane	GO_cellular_component_complete	16	4.3e-08	1.52e-05	ENSBTAG00000008347	mitochondrial ribosomal protein L48(MRPL48)	DOWN
GO	GO:0005743	mitochondrial inner membrane	GO_cellular_component_complete	16	4.3e-08	1.52e-05	ENSBTAG00000018496	translocase of inner mitochondrial membrane 17B (TIMM17B)	DOWN
GO	GO:0005743	mitochondrial inner membrane	GO_cellular_component_complete	16	4.3e-08	1.52e-05	ENSBTAG00000043550	cytochrome b(CYTB)	UP
GO	GO:0005743	mitochondrial inner membrane	GO_cellular_component_complete	16	4.3e-08	1.52e-05	ENSBTAG00000043561	cytochrome c oxidase subunit I(COX1)	UP
GO	GO:0005743	mitochondrial inner membrane	GO_cellular_component_complete	16	4.3e-08	1.52e-05	ENSBTAG00000015639	Era like 12S mitochondrial rRNA chaperone 1(ERAL1)	DOWN
GO	GO:0005743	mitochondrial inner membrane	GO_cellular_component_complete	16	4.3e-08	1.52e-05	ENSBTAG00000012788	cytochrome c oxidase subunit VIa polypeptide 1(COX6A1)	DOWN
GO	GO:0005743	mitochondrial inner membrane	GO_cellular_component_complete	16	4.3e-08	1.52e-05	ENSBTAG00000043568	NADH dehydrogenase subunit 3(ND3)	UP
GO	GO:0005743	mitochondrial inner membrane	GO_cellular_component_complete	16	4.3e-08	1.52e-05	ENSBTAG00000043558	NADH dehydrogenase subunit 1(ND1)	UP
GO	GO:0005743	mitochondrial inner membrane	GO_cellular_component_complete	16	4.3e-08	1.52e-05	ENSBTAG00000010715	mitochondrial ribosomal protein L37(MRPL37)	DOWN
GO	GO:0005743	mitochondrial inner membrane	GO_cellular_component_complete	16	4.3e-08	1.52e-05	ENSBTAG00000014536	sideroflexin 1(SFXN1)	DOWN
GO	GO:0005743	mitochondrial inner membrane	GO_cellular_component_complete	16	4.3e-08	1.52e-05	ENSBTAG00000043559	NADH dehydrogenase subunit 4L(ND4L)	UP
GO	GO:0005743	mitochondrial inner membrane	GO_cellular_component_complete	16	4.3e-08	1.52e-05	ENSBTAG00000043584	ATP synthase F0 subunit 6(ATP6)	UP
GO	GO:0005743	mitochondrial inner membrane	GO_cellular_component_complete	16	4.3e-08	1.52e-05	ENSBTAG00000004295	NADH:ubiquinone oxidoreductase subunit A8(NDUFA8)	DOWN
GO	GO:0005743	mitochondrial inner membrane	GO_cellular_component_complete	16	4.3e-08	1.52e-05	ENSBTAG00000043563	NADH dehydrogenase subunit 5(ND5)	UP
GO	GO:0005743	mitochondrial inner membrane	GO_cellular_component_complete	16	4.3e-08	1.52e-05	ENSBTAG00000043577	NADH dehydrogenase subunit 4(ND4)	UP
GO	GO:0005743	mitochondrial inner membrane	GO_cellular_component_complete	16	4.3e-08	1.52e-05	ENSBTAG00000014442	mitochondrial ribosome associated GTPase 2(MTG2)	DOWN
GO	GO:0019866	organelle inner membrane	GO_cellular_component_complete	16	2.05e-07	5.19e-05	ENSBTAG00000008347	mitochondrial ribosomal protein L48(MRPL48)	DOWN
GO	GO:0019867	organelle inner membrane	GO_cellular_component_complete	16	2.05e-07	5.19e-05	ENSBTAG00000018496	translocase of inner mitochondrial membrane 17B (TIMM17B)	DOWN
GO	GO:0019868	organelle inner membrane	GO_cellular_component_complete	16	2.05e-07	5.19e-05	ENSBTAG00000043550	cytochrome b(CYTB)	UP
GO	GO:0019869	organelle inner membrane	GO_cellular_component_complete	16	2.05e-07	5.19e-05	ENSBTAG00000043561	cytochrome c oxidase subunit I(COX1)	UP
GO	GO:0019870	organelle inner membrane	GO_cellular_component_complete	16	2.05e-07	5.19e-05	ENSBTAG00000015639	Era like 12S mitochondrial rRNA chaperone 1(ERAL1)	DOWN
GO	GO:0019871	organelle inner membrane	GO_cellular_component_complete	16	2.05e-07	5.19e-05	ENSBTAG00000012788	cytochrome c oxidase subunit VIa polypeptide 1(COX6A1)	DOWN
GO	GO:0019872	organelle inner membrane	GO_cellular_component_complete	16	2.05e-07	5.19e-05	ENSBTAG00000043568	NADH dehydrogenase subunit 3(ND3)	UP
GO	GO:0019873	organelle inner membrane	GO_cellular_component_complete	16	2.05e-07	5.19e-05	ENSBTAG00000043558	NADH dehydrogenase subunit 1(ND1)	UP
GO	GO:0019874	organelle inner membrane	GO_cellular_component_complete	16	2.05e-07	5.19e-05	ENSBTAG00000010715	mitochondrial ribosomal protein L37(MRPL37)	DOWN
GO	GO:0019875	organelle inner membrane	GO_cellular_component_complete	16	2.05e-07	5.19e-05	ENSBTAG00000014536	sideroflexin 1(SFXN1)	DOWN
GO	GO:0019876	organelle inner membrane	GO_cellular_component_complete	16	2.05e-07	5.19e-05	ENSBTAG00000043559	NADH dehydrogenase subunit 4L(ND4L)	UP
GO	GO:0019877	organelle inner membrane	GO_cellular_component_complete	16	2.05e-07	5.19e-05	ENSBTAG00000043584	ATP synthase F0 subunit 6(ATP6)	UP
GO	GO:0019878	organelle inner membrane	GO_cellular_component_complete	16	2.05e-07	5.19e-05	ENSBTAG00000004295	NADH:ubiquinone oxidoreductase subunit A8(NDUFA8)	DOWN
GO	GO:0019879	organelle inner membrane	GO_cellular_component_complete	16	2.05e-07	5.19e-05	ENSBTAG00000043563	NADH dehydrogenase subunit 5(ND5)	UP
GO	GO:0019880	organelle inner membrane	GO_cellular_component_complete	16	2.05e-07	5.19e-05	ENSBTAG00000043577	NADH dehydrogenase subunit 4(ND4)	UP
GO	GO:0019881	organelle inner membrane	GO_cellular_component_complete	16	2.05e-07	5.19e-05	ENSBTAG00000014442	mitochondrial ribosome associated GTPase 2(MTG2)	DOWN
GO	GO:0031966	mitochondrial membrane	GO_cellular_component_complete	17	6.04e-07	0.000119	ENSBTAG00000008347	mitochondrial ribosomal protein L48(MRPL48)	DOWN
GO	GO:0031966	mitochondrial membrane	GO_cellular_component_complete	17	6.04e-07	0.000119	ENSBTAG00000018496	translocase of inner mitochondrial membrane 17B (TIMM17B)	DOWN
GO	GO:0031966	mitochondrial membrane	GO_cellular_component_complete	17	6.04e-07	0.000119	ENSBTAG00000043550	cytochrome b(CYTB)	UP
GO	GO:0031966	mitochondrial membrane	GO_cellular_component_complete	17	6.04e-07	0.000119	ENSBTAG00000043561	cytochrome c oxidase subunit I(COX1)	UP
GO	GO:0031966	mitochondrial membrane	GO_cellular_component_complete	17	6.04e-07	0.000119	ENSBTAG00000015639	Era like 12S mitochondrial rRNA chaperone 1(ERAL1)	DOWN
GO	GO:0031966	mitochondrial membrane	GO_cellular_component_complete	17	6.04e-07	0.000119	ENSBTAG00000012788	cytochrome c oxidase subunit VIa polypeptide 1(COX6A1)	DOWN
GO	GO:0031966	mitochondrial membrane	GO_cellular_component_complete	17	6.04e-07	0.000119	ENSBTAG00000043568	NADH dehydrogenase subunit 3(ND3)	UP
GO	GO:0031966	mitochondrial membrane	GO_cellular_component_complete	17	6.04e-07	0.000119	ENSBTAG00000043558	NADH dehydrogenase subunit 1(ND1)	UP
GO	GO:0031966	mitochondrial membrane	GO_cellular_component_complete	17	6.04e-07	0.000119	ENSBTAG00000010715	mitochondrial ribosomal protein L37(MRPL37)	DOWN
GO	GO:0031966	mitochondrial membrane	GO_cellular_component_complete	17	6.04e-07	0.000119	ENSBTAG00000014536	sideroflexin 1(SFXN1)	DOWN
GO	GO:0031966	mitochondrial membrane	GO_cellular_component_complete	17	6.04e-07	0.000119	ENSBTAG00000043559	NADH dehydrogenase subunit 4L(ND4L)	UP
GO	GO:0031966	mitochondrial membrane	GO_cellular_component_complete	17	6.04e-07	0.000119	ENSBTAG00000043584	ATP synthase F0 subunit 6(ATP6)	UP
GO	GO:0031966	mitochondrial membrane	GO_cellular_component_complete	17	6.04e-07	0.000119	ENSBTAG00000004295	NADH:ubiquinone oxidoreductase subunit A8(NDUFA8)	DOWN
GO	GO:0031966	mitochondrial membrane	GO_cellular_component_complete	17	6.04e-07	0.000119	ENSBTAG00000043563	NADH dehydrogenase subunit 5(ND5)	UP
GO	GO:0031966	mitochondrial membrane	GO_cellular_component_complete	17	6.04e-07	0.000119	ENSBTAG00000043577	NADH dehydrogenase subunit 4(ND4)	UP
GO	GO:0031966	mitochondrial membrane	GO_cellular_component_complete	17	6.04e-07	0.000119	ENSBTAG00000014442	mitochondrial ribosome associated GTPase 2(MTG2)	DOWN
GO	GO:0031966	mitochondrial membrane	GO_cellular_component_complete	17	6.04e-07	0.000119	ENSBTAG00000043546	NADH dehydrogenase subunit 6(ND6)	UP
GO	GO:0005740	mitochondrial envelope	GO_cellular_component_complete	18	2.95e-07	6.51e-05	ENSBTAG00000008347	mitochondrial ribosomal protein L48(MRPL48)	DOWN
GO	GO:0005740	mitochondrial envelope	GO_cellular_component_complete	18	2.95e-07	6.51e-05	ENSBTAG00000018496	translocase of inner mitochondrial membrane 17B (TIMM17B)	DOWN
GO	GO:0005740	mitochondrial envelope	GO_cellular_component_complete	18	2.95e-07	6.51e-05	ENSBTAG00000043550	cytochrome b(CYTB)	UP
GO	GO:0005740	mitochondrial envelope	GO_cellular_component_complete	18	2.95e-07	6.51e-05	ENSBTAG00000043561	cytochrome c oxidase subunit I(COX1)	UP
GO	GO:0005740	mitochondrial envelope	GO_cellular_component_complete	18	2.95e-07	6.51e-05	ENSBTAG00000015639	Era like 12S mitochondrial rRNA chaperone 1(ERAL1)	DOWN
GO	GO:0005740	mitochondrial envelope	GO_cellular_component_complete	18	2.95e-07	6.51e-05	ENSBTAG00000012788	cytochrome c oxidase subunit VIa polypeptide 1(COX6A1)	DOWN
GO	GO:0005740	mitochondrial envelope	GO_cellular_component_complete	18	2.95e-07	6.51e-05	ENSBTAG00000043568	NADH dehydrogenase subunit 3(ND3)	UP
GO	GO:0005740	mitochondrial envelope	GO_cellular_component_complete	18	2.95e-07	6.51e-05	ENSBTAG00000043558	NADH dehydrogenase subunit 1(ND1)	UP
GO	GO:0005740	mitochondrial envelope	GO_cellular_component_complete	18	2.95e-07	6.51e-05	ENSBTAG00000010715	mitochondrial ribosomal protein L37(MRPL37)	DOWN
GO	GO:0005740	mitochondrial envelope	GO_cellular_component_complete	18	2.95e-07	6.51e-05	ENSBTAG00000005009	PRELI domain containing 1 (PRELID1)	DOWN
GO	GO:0005740	mitochondrial envelope	GO_cellular_component_complete	18	2.95e-07	6.51e-05	ENSBTAG00000014536	sideroflexin 1(SFXN1)	DOWN
GO	GO:0005740	mitochondrial envelope	GO_cellular_component_complete	18	2.95e-07	6.51e-05	ENSBTAG00000043559	NADH dehydrogenase subunit 4L(ND4L)	UP
GO	GO:0005740	mitochondrial envelope	GO_cellular_component_complete	18	2.95e-07	6.51e-05	ENSBTAG00000043584	ATP synthase F0 subunit 6(ATP6)	UP
GO	GO:0005740	mitochondrial envelope	GO_cellular_component_complete	18	2.95e-07	6.51e-05	ENSBTAG00000004295	NADH:ubiquinone oxidoreductase subunit A8(NDUFA8)	DOWN
GO	GO:0005740	mitochondrial envelope	GO_cellular_component_complete	18	2.95e-07	6.51e-05	ENSBTAG00000043563	NADH dehydrogenase subunit 5(ND5)	UP
GO	GO:0005740	mitochondrial envelope	GO_cellular_component_complete	18	2.95e-07	6.51e-05	ENSBTAG00000043577	NADH dehydrogenase subunit 4(ND4)	UP
GO	GO:0005740	mitochondrial envelope	GO_cellular_component_complete	18	2.95e-07	6.51e-05	ENSBTAG00000014442	mitochondrial ribosome associated GTPase 2(MTG2)	DOWN
GO	GO:0005740	mitochondrial envelope	GO_cellular_component_complete	18	2.95e-07	6.51e-05	ENSBTAG00000043546	NADH dehydrogenase subunit 6(ND6)	UP
GO	GO:0031975	envelope	GO_cellular_component_complete	21	3e-06	0.000483	ENSBTAG00000008347	mitochondrial ribosomal protein L48(MRPL48)	DOWN
GO	GO:0031975	envelope	GO_cellular_component_complete	21	3e-06	0.000483	ENSBTAG00000018496	translocase of inner mitochondrial membrane 17B (TIMM17B)	DOWN
GO	GO:0031975	envelope	GO_cellular_component_complete	21	3e-06	0.000483	ENSBTAG00000043550	cytochrome b(CYTB)	UP
GO	GO:0031975	envelope	GO_cellular_component_complete	21	3e-06	0.000483	ENSBTAG00000043561	cytochrome c oxidase subunit I(COX1)	UP
GO	GO:0031975	envelope	GO_cellular_component_complete	21	3e-06	0.000483	ENSBTAG00000007623	ceramide-1-phosphate transfer protein (CPTP)	DOWN
GO	GO:0031975	envelope	GO_cellular_component_complete	21	3e-06	0.000483	ENSBTAG00000015639	Era like 12S mitochondrial rRNA chaperone 1(ERAL1)	DOWN
GO	GO:0031975	envelope	GO_cellular_component_complete	21	3e-06	0.000483	ENSBTAG00000012788	cytochrome c oxidase subunit VIa polypeptide 1(COX6A1)	DOWN
GO	GO:0031975	envelope	GO_cellular_component_complete	21	3e-06	0.000483	ENSBTAG00000043568	NADH dehydrogenase subunit 3(ND3)	UP
GO	GO:0031975	envelope	GO_cellular_component_complete	21	3e-06	0.000483	ENSBTAG00000043558	NADH dehydrogenase subunit 1(ND1)	UP
GO	GO:0031975	envelope	GO_cellular_component_complete	21	3e-06	0.000483	ENSBTAG00000010715	mitochondrial ribosomal protein L37(MRPL37)	DOWN
GO	GO:0031975	envelope	GO_cellular_component_complete	21	3e-06	0.000483	ENSBTAG00000005009	PRELI domain containing 1 (PRELID1)	DOWN
GO	GO:0031975	envelope	GO_cellular_component_complete	21	3e-06	0.000483	ENSBTAG00000014536	sideroflexin 1(SFXN1)	DOWN
GO	GO:0031975	envelope	GO_cellular_component_complete	21	3e-06	0.000483	ENSBTAG00000043559	NADH dehydrogenase subunit 4L(ND4L)	UP
GO	GO:0031975	envelope	GO_cellular_component_complete	21	3e-06	0.000483	ENSBTAG00000043584	ATP synthase F0 subunit 6(ATP6)	UP
GO	GO:0031975	envelope	GO_cellular_component_complete	21	3e-06	0.000483	ENSBTAG00000004295	NADH:ubiquinone oxidoreductase subunit A8(NDUFA8)	DOWN
GO	GO:0031975	envelope	GO_cellular_component_complete	21	3e-06	0.000483	ENSBTAG00000043563	NADH dehydrogenase subunit 5(ND5)	UP
GO	GO:0031975	envelope	GO_cellular_component_complete	21	3e-06	0.000483	ENSBTAG00000000507	nuclear receptor subfamily 4 group A member 1 (NR4A1)	UP
GO	GO:0031975	envelope	GO_cellular_component_complete	21	3e-06	0.000483	ENSBTAG00000043577	NADH dehydrogenase subunit 4(ND4)	UP
GO	GO:0031975	envelope	GO_cellular_component_complete	21	3e-06	0.000483	ENSBTAG00000012352	poly(ADP-ribose) polymerase family member 16 (PARP16)	UP
GO	GO:0031975	envelope	GO_cellular_component_complete	21	3e-06	0.000483	ENSBTAG00000014442	mitochondrial ribosome associated GTPase 2(MTG2)	DOWN
GO	GO:0031975	envelope	GO_cellular_component_complete	21	3e-06	0.000483	ENSBTAG00000043546	NADH dehydrogenase subunit 6(ND6)	UP
GO	GO:0031967	organelle envelope	GO_cellular_component_complete	21	3e-06	0.000443	ENSBTAG00000008347	mitochondrial ribosomal protein L48(MRPL48)	DOWN
GO	GO:0031967	organelle envelope	GO_cellular_component_complete	21	3e-06	0.000443	ENSBTAG00000018496	translocase of inner mitochondrial membrane 17B (TIMM17B)	DOWN
GO	GO:0031967	organelle envelope	GO_cellular_component_complete	21	3e-06	0.000443	ENSBTAG00000043550	cytochrome b(CYTB)	UP
GO	GO:0031967	organelle envelope	GO_cellular_component_complete	21	3e-06	0.000443	ENSBTAG00000043561	cytochrome c oxidase subunit I(COX1)	UP
GO	GO:0031967	organelle envelope	GO_cellular_component_complete	21	3e-06	0.000443	ENSBTAG00000007623	ceramide-1-phosphate transfer protein (CPTP)	DOWN
GO	GO:0031967	organelle envelope	GO_cellular_component_complete	21	3e-06	0.000443	ENSBTAG00000015639	Era like 12S mitochondrial rRNA chaperone 1(ERAL1)	DOWN
GO	GO:0031967	organelle envelope	GO_cellular_component_complete	21	3e-06	0.000443	ENSBTAG00000012788	cytochrome c oxidase subunit VIa polypeptide 1(COX6A1)	DOWN
GO	GO:0031967	organelle envelope	GO_cellular_component_complete	21	3e-06	0.000443	ENSBTAG00000043568	NADH dehydrogenase subunit 3(ND3)	UP
GO	GO:0031967	organelle envelope	GO_cellular_component_complete	21	3e-06	0.000443	ENSBTAG00000043558	NADH dehydrogenase subunit 1(ND1)	UP
GO	GO:0031967	organelle envelope	GO_cellular_component_complete	21	3e-06	0.000443	ENSBTAG00000010715	mitochondrial ribosomal protein L37(MRPL37)	DOWN
GO	GO:0031967	organelle envelope	GO_cellular_component_complete	21	3e-06	0.000443	ENSBTAG00000005009	PRELI domain containing 1 (PRELID1)	DOWN
GO	GO:0031967	organelle envelope	GO_cellular_component_complete	21	3e-06	0.000443	ENSBTAG00000014536	sideroflexin 1(SFXN1)	DOWN
GO	GO:0031967	organelle envelope	GO_cellular_component_complete	21	3e-06	0.000443	ENSBTAG00000043559	NADH dehydrogenase subunit 4L(ND4L)	UP
GO	GO:0031967	organelle envelope	GO_cellular_component_complete	21	3e-06	0.000443	ENSBTAG00000043584	ATP synthase F0 subunit 6(ATP6)	UP
GO	GO:0031967	organelle envelope	GO_cellular_component_complete	21	3e-06	0.000443	ENSBTAG00000004295	NADH:ubiquinone oxidoreductase subunit A8(NDUFA8)	DOWN
GO	GO:0031967	organelle envelope	GO_cellular_component_complete	21	3e-06	0.000443	ENSBTAG00000043563	NADH dehydrogenase subunit 5(ND5)	UP
GO	GO:0031967	organelle envelope	GO_cellular_component_complete	21	3e-06	0.000443	ENSBTAG00000000507	nuclear receptor subfamily 4 group A member 1 (NR4A1)	UP
GO	GO:0031967	organelle envelope	GO_cellular_component_complete	21	3e-06	0.000443	ENSBTAG00000043577	NADH dehydrogenase subunit 4(ND4)	UP
GO	GO:0031967	organelle envelope	GO_cellular_component_complete	21	3e-06	0.000443	ENSBTAG00000012352	poly(ADP-ribose) polymerase family member 16 (PARP16)	UP
GO	GO:0031967	organelle envelope	GO_cellular_component_complete	21	3e-06	0.000443	ENSBTAG00000014442	mitochondrial ribosome associated GTPase 2(MTG2)	DOWN
GO	GO:0031967	organelle envelope	GO_cellular_component_complete	21	3e-06	0.000443	ENSBTAG00000043546	NADH dehydrogenase subunit 6(ND6)	UP
GO	GO:0005739	mitochondrion	GO_cellular_component_complete	25	9.34e-06	0.00103	ENSBTAG00000008347	mitochondrial ribosomal protein L48(MRPL48)	DOWN
GO	GO:0005739	mitochondrion	GO_cellular_component_complete	25	9.34e-06	0.00103	ENSBTAG00000012943	PPARG coactivator 1 beta (PPARGC1B)	DOWN
GO	GO:0005739	mitochondrion	GO_cellular_component_complete	25	9.34e-06	0.00103	ENSBTAG00000018496	translocase of inner mitochondrial membrane 17B (TIMM17B)	DOWN
GO	GO:0005739	mitochondrion	GO_cellular_component_complete	25	9.34e-06	0.00103	ENSBTAG00000043550	cytochrome b(CYTB)	UP
GO	GO:0005739	mitochondrion	GO_cellular_component_complete	25	9.34e-06	0.00103	ENSBTAG00000043561	cytochrome c oxidase subunit I(COX1)	UP
GO	GO:0005739	mitochondrion	GO_cellular_component_complete	25	9.34e-06	0.00103	ENSBTAG00000014675	pentatricopeptide repeat domain 2 (PTCD2)	UP
GO	GO:0005739	mitochondrion	GO_cellular_component_complete	25	9.34e-06	0.00103	ENSBTAG00000015639	Era like 12S mitochondrial rRNA chaperone 1(ERAL1)	DOWN
GO	GO:0005739	mitochondrion	GO_cellular_component_complete	25	9.34e-06	0.00103	ENSBTAG00000012788	cytochrome c oxidase subunit VIa polypeptide 1(COX6A1)	DOWN
GO	GO:0005739	mitochondrion	GO_cellular_component_complete	25	9.34e-06	0.00103	ENSBTAG00000043568	NADH dehydrogenase subunit 3(ND3)	UP
GO	GO:0005739	mitochondrion	GO_cellular_component_complete	25	9.34e-06	0.00103	ENSBTAG00000043558	NADH dehydrogenase subunit 1(ND1)	UP
GO	GO:0005739	mitochondrion	GO_cellular_component_complete	25	9.34e-06	0.00103	ENSBTAG00000010715	mitochondrial ribosomal protein L37(MRPL37)	DOWN
GO	GO:0005739	mitochondrion	GO_cellular_component_complete	25	9.34e-06	0.00103	ENSBTAG00000008648	peroxiredoxin 5 (PRDX5)	DOWN
GO	GO:0005739	mitochondrion	GO_cellular_component_complete	25	9.34e-06	0.00103	ENSBTAG00000005009	PRELI domain containing 1 (PRELID1)	DOWN
GO	GO:0005739	mitochondrion	GO_cellular_component_complete	25	9.34e-06	0.00103	ENSBTAG00000014536	sideroflexin 1(SFXN1)	DOWN
GO	GO:0005739	mitochondrion	GO_cellular_component_complete	25	9.34e-06	0.00103	ENSBTAG00000043559	NADH dehydrogenase subunit 4L(ND4L)	UP
GO	GO:0005739	mitochondrion	GO_cellular_component_complete	25	9.34e-06	0.00103	ENSBTAG00000043584	ATP synthase F0 subunit 6(ATP6)	UP
GO	GO:0005739	mitochondrion	GO_cellular_component_complete	25	9.34e-06	0.00103	ENSBTAG00000004295	NADH:ubiquinone oxidoreductase subunit A8(NDUFA8)	DOWN
GO	GO:0005739	mitochondrion	GO_cellular_component_complete	25	9.34e-06	0.00103	ENSBTAG00000009462	malate dehydrogenase 2(MDH2)	DOWN
GO	GO:0005739	mitochondrion	GO_cellular_component_complete	25	9.34e-06	0.00103	ENSBTAG00000043563	NADH dehydrogenase subunit 5(ND5)	UP
GO	GO:0005739	mitochondrion	GO_cellular_component_complete	25	9.34e-06	0.00103	ENSBTAG00000000507	nuclear receptor subfamily 4 group A member 1 (NR4A1)	UP
GO	GO:0005739	mitochondrion	GO_cellular_component_complete	25	9.34e-06	0.00103	ENSBTAG00000007690	alanine--glyoxylate aminotransferase 2(AGXT2)	DOWN
GO	GO:0005739	mitochondrion	GO_cellular_component_complete	25	9.34e-06	0.00103	ENSBTAG00000043577	NADH dehydrogenase subunit 4(ND4)	UP
GO	GO:0005739	mitochondrion	GO_cellular_component_complete	25	9.34e-06	0.00103	ENSBTAG00000025540	Alpha-ketoglutarate-dependent dioxygenase alkB homolog 7(ALKBH7)	DOWN
GO	GO:0005739	mitochondrion	GO_cellular_component_complete	25	9.34e-06	0.00103	ENSBTAG00000014442	mitochondrial ribosome associated GTPase 2(MTG2)	DOWN
GO	GO:0005739	mitochondrion	GO_cellular_component_complete	25	9.34e-06	0.00103	ENSBTAG00000043546	NADH dehydrogenase subunit 6(ND6)	UP
GO	GO:0098796	membrane protein complex	GO_cellular_component_complete	18	0.000336	0.035	ENSBTAG00000018496	translocase of inner mitochondrial membrane 17B (TIMM17B)	DOWN
GO	GO:0098796	membrane protein complex	GO_cellular_component_complete	18	0.000336	0.035	ENSBTAG00000043550	cytochrome b(CYTB)	UP
GO	GO:0098796	membrane protein complex	GO_cellular_component_complete	18	0.000336	0.035	ENSBTAG00000043561	cytochrome c oxidase subunit I(COX1)	UP
GO	GO:0098796	membrane protein complex	GO_cellular_component_complete	18	0.000336	0.035	ENSBTAG00000001744	Bet1 golgi vesicular membrane trafficking protein like (BET1L)	DOWN
GO	GO:0098796	membrane protein complex	GO_cellular_component_complete	18	0.000336	0.035	ENSBTAG00000012788	cytochrome c oxidase subunit VIa polypeptide 1(COX6A1)	DOWN
GO	GO:0098796	membrane protein complex	GO_cellular_component_complete	18	0.000336	0.035	ENSBTAG00000013030	leucine rich repeat containing 8 VRAC subunit A (LRRC8A)	DOWN
GO	GO:0098796	membrane protein complex	GO_cellular_component_complete	18	0.000336	0.035	ENSBTAG00000043568	NADH dehydrogenase subunit 3(ND3)	UP
GO	GO:0098796	membrane protein complex	GO_cellular_component_complete	18	0.000336	0.035	ENSBTAG00000043558	NADH dehydrogenase subunit 1(ND1)	UP
GO	GO:0098796	membrane protein complex	GO_cellular_component_complete	18	0.000336	0.035	ENSBTAG00000017685	junction plakoglobin (JUP)	UP
GO	GO:0098796	membrane protein complex	GO_cellular_component_complete	18	0.000336	0.035	ENSBTAG00000043559	NADH dehydrogenase subunit 4L(ND4L)	UP
GO	GO:0098796	membrane protein complex	GO_cellular_component_complete	18	0.000336	0.035	ENSBTAG00000043584	ATP synthase F0 subunit 6(ATP6)	UP
GO	GO:0098796	membrane protein complex	GO_cellular_component_complete	18	0.000336	0.035	ENSBTAG00000004295	NADH:ubiquinone oxidoreductase subunit A8(NDUFA8)	DOWN
GO	GO:0098796	membrane protein complex	GO_cellular_component_complete	18	0.000336	0.035	ENSBTAG00000043563	NADH dehydrogenase subunit 5(ND5)	UP
GO	GO:0098796	membrane protein complex	GO_cellular_component_complete	18	0.000336	0.035	ENSBTAG00000017466	hyperpolarization activated cyclic nucleotide gated potassium channel 4 (HCN4)	UP
GO	GO:0098796	membrane protein complex	GO_cellular_component_complete	18	0.000336	0.035	ENSBTAG00000014553	ATPase H+ transporting V0 subunit d1(ATP6V0D1)	DOWN
GO	GO:0098796	membrane protein complex	GO_cellular_component_complete	18	0.000336	0.035	ENSBTAG00000021160	adaptor related protein complex 1 subunit mu 2 (AP1M2)	DOWN
GO	GO:0098796	membrane protein complex	GO_cellular_component_complete	18	0.000336	0.035	ENSBTAG00000043577	NADH dehydrogenase subunit 4(ND4)	UP
GO	GO:0098796	membrane protein complex	GO_cellular_component_complete	18	0.000336	0.035	ENSBTAG00000040607	Src like adaptor 2 (SLA2)	UP
GO	GO:0043227	membrane-bounded organelle	GO_cellular_component_complete	87	0.00034	0.0335	ENSBTAG00000016433	FA complementation group B (FANCB)	UP
GO	GO:0043228	membrane-bounded organelle	GO_cellular_component_complete	87	0.00034	0.0335	ENSBTAG00000008347	mitochondrial ribosomal protein L48(MRPL48)	DOWN
GO	GO:0043229	membrane-bounded organelle	GO_cellular_component_complete	87	0.00034	0.0335	ENSBTAG00000005974	apolipoprotein B mRNA editing enzyme catalytic subunit 2 (APOBEC2)	DOWN
GO	GO:0043230	membrane-bounded organelle	GO_cellular_component_complete	87	0.00034	0.0335	ENSBTAG00000018688	carbonyl reductase 3 (CBR3)	DOWN
GO	GO:0043231	membrane-bounded organelle	GO_cellular_component_complete	87	0.00034	0.0335	ENSBTAG00000011414	eukaryotic translation initiation factor 2B subunit epsilon (EIF2B5)	DOWN
GO	GO:0043232	membrane-bounded organelle	GO_cellular_component_complete	87	0.00034	0.0335	ENSBTAG00000012943	PPARG coactivator 1 beta (PPARGC1B)	DOWN
GO	GO:0043233	membrane-bounded organelle	GO_cellular_component_complete	87	0.00034	0.0335	ENSBTAG00000016568	LUC7 like (LUC7L)	DOWN
GO	GO:0043234	membrane-bounded organelle	GO_cellular_component_complete	87	0.00034	0.0335	ENSBTAG00000021617	zinc finger CCCH-type containing, antiviral 1 (ZC3HAV1)	DOWN
GO	GO:0043235	membrane-bounded organelle	GO_cellular_component_complete	87	0.00034	0.0335	ENSBTAG00000022044	RAB35, member RAS oncogene family (RAB35)	DOWN
GO	GO:0043236	membrane-bounded organelle	GO_cellular_component_complete	87	0.00034	0.0335	ENSBTAG00000002748	phosphatidylinositol-4,5-bisphosphate 4-phosphatase 1 (PIP4P1)	DOWN
GO	GO:0043237	membrane-bounded organelle	GO_cellular_component_complete	87	0.00034	0.0335	ENSBTAG00000018496	translocase of inner mitochondrial membrane 17B (TIMM17B)	DOWN
GO	GO:0043238	membrane-bounded organelle	GO_cellular_component_complete	87	0.00034	0.0335	ENSBTAG00000043550	cytochrome b(CYTB)	UP
GO	GO:0043239	membrane-bounded organelle	GO_cellular_component_complete	87	0.00034	0.0335	ENSBTAG00000043561	cytochrome c oxidase subunit I(COX1)	UP
GO	GO:0043240	membrane-bounded organelle	GO_cellular_component_complete	87	0.00034	0.0335	ENSBTAG00000001744	Bet1 golgi vesicular membrane trafficking protein like (BET1L)	DOWN
GO	GO:0043241	membrane-bounded organelle	GO_cellular_component_complete	87	0.00034	0.0335	ENSBTAG00000007623	ceramide-1-phosphate transfer protein (CPTP)	DOWN
GO	GO:0043242	membrane-bounded organelle	GO_cellular_component_complete	87	0.00034	0.0335	ENSBTAG00000014675	pentatricopeptide repeat domain 2 (PTCD2)	UP
GO	GO:0043243	membrane-bounded organelle	GO_cellular_component_complete	87	0.00034	0.0335	ENSBTAG00000011263	eukaryotic translation initiation factor 6 (EIF6)	UP
GO	GO:0043244	membrane-bounded organelle	GO_cellular_component_complete	87	0.00034	0.0335	ENSBTAG00000017597	establishment of sister chromatid cohesion N-acetyltransferase 1 (ESCO1)	UP
GO	GO:0043245	membrane-bounded organelle	GO_cellular_component_complete	87	0.00034	0.0335	ENSBTAG00000017680	nitric oxide synthase 3(NOS3)	UP
GO	GO:0043246	membrane-bounded organelle	GO_cellular_component_complete	87	0.00034	0.0335	ENSBTAG00000008180	spindle apparatus coiled-coil protein 1 (SPDL1)	UP
GO	GO:0043247	membrane-bounded organelle	GO_cellular_component_complete	87	0.00034	0.0335	ENSBTAG00000005980	ras responsive element binding protein 1 (RREB1)	UP
GO	GO:0043248	membrane-bounded organelle	GO_cellular_component_complete	87	0.00034	0.0335	ENSBTAG00000000387	nicolin 1 (NICN1)	UP
GO	GO:0043249	membrane-bounded organelle	GO_cellular_component_complete	87	0.00034	0.0335	ENSBTAG00000015639	Era like 12S mitochondrial rRNA chaperone 1(ERAL1)	DOWN
GO	GO:0043250	membrane-bounded organelle	GO_cellular_component_complete	87	0.00034	0.0335	ENSBTAG00000000694	ATA-box binding protein associated factor 10 (TAF10)	DOWN
GO	GO:0043251	membrane-bounded organelle	GO_cellular_component_complete	87	0.00034	0.0335	ENSBTAG00000013277	coiled-coil domain containing 22 (CCDC22)	DOWN
GO	GO:0043252	membrane-bounded organelle	GO_cellular_component_complete	87	0.00034	0.0335	ENSBTAG00000012788	cytochrome c oxidase subunit VIa polypeptide 1(COX6A1)	DOWN
GO	GO:0043253	membrane-bounded organelle	GO_cellular_component_complete	87	0.00034	0.0335	ENSBTAG00000020777	ERCC excision repair 3, TFIIH core complex helicase subunit (ERCC3	UP
GO	GO:0043254	membrane-bounded organelle	GO_cellular_component_complete	87	0.00034	0.0335	ENSBTAG00000016230	bromodomain and WD repeat domain containing 3 (BRWD3)	UP
GO	GO:0043255	membrane-bounded organelle	GO_cellular_component_complete	87	0.00034	0.0335	ENSBTAG00000010247	fukutin (FKTN)	UP
GO	GO:0043256	membrane-bounded organelle	GO_cellular_component_complete	87	0.00034	0.0335	ENSBTAG00000036028	brain expressed X-linked 2 (BEX2)	DOWN
GO	GO:0043257	membrane-bounded organelle	GO_cellular_component_complete	87	0.00034	0.0335	ENSBTAG00000043568	NADH dehydrogenase subunit 3(ND3)	UP
GO	GO:0043258	membrane-bounded organelle	GO_cellular_component_complete	87	0.00034	0.0335	ENSBTAG00000039313	zinc finger protein 341 (ZNF341)	DOWN
GO	GO:0043259	membrane-bounded organelle	GO_cellular_component_complete	87	0.00034	0.0335	ENSBTAG00000043558	NADH dehydrogenase subunit 1(ND1)	UP
GO	GO:0043260	membrane-bounded organelle	GO_cellular_component_complete	87	0.00034	0.0335	ENSBTAG00000010715	mitochondrial ribosomal protein L37(MRPL37)	DOWN
GO	GO:0043261	membrane-bounded organelle	GO_cellular_component_complete	87	0.00034	0.0335	ENSBTAG00000017685	junction plakoglobin (JUP)	UP
GO	GO:0043262	membrane-bounded organelle	GO_cellular_component_complete	87	0.00034	0.0335	ENSBTAG00000018971	RAD51 paralog B (RAD51B)	DOWN
GO	GO:0043263	membrane-bounded organelle	GO_cellular_component_complete	87	0.00034	0.0335	ENSBTAG00000010422	MDM2 proto-oncogene (MDM2)	DOWN
GO	GO:0043264	membrane-bounded organelle	GO_cellular_component_complete	87	0.00034	0.0335	ENSBTAG00000020040	lysophosphatidylcholine acyltransferase 4(LPCAT4)	DOWN
GO	GO:0043265	membrane-bounded organelle	GO_cellular_component_complete	87	0.00034	0.0335	ENSBTAG00000010467	SPT5 homolog, DSIF elongation factor subunit (SUPT5H)	DOWN
GO	GO:0043266	membrane-bounded organelle	GO_cellular_component_complete	87	0.00034	0.0335	ENSBTAG00000011287	ataxin 7 (ATXN7)	DOWN
GO	GO:0043267	membrane-bounded organelle	GO_cellular_component_complete	87	0.00034	0.0335	ENSBTAG00000008648	Peroxiredoxin-5 (PRDX5)	DOWN
GO	GO:0043268	membrane-bounded organelle	GO_cellular_component_complete	87	0.00034	0.0335	ENSBTAG00000019909	sirtuin 6 (SIRT6)	DOWN
GO	GO:0043269	membrane-bounded organelle	GO_cellular_component_complete	87	0.00034	0.0335	ENSBTAG00000038842	neural precursor cell expressed, developmentally down-regulated 8 (NEDD8)	DOWN
GO	GO:0043270	membrane-bounded organelle	GO_cellular_component_complete	87	0.00034	0.0335	ENSBTAG00000003532	transducin like enhancer of split 4 (TLE4)	UP
GO	GO:0043271	membrane-bounded organelle	GO_cellular_component_complete	87	0.00034	0.0335	ENSBTAG00000034069	mab-21 like 1 (MAB21L1)	UP
GO	GO:0043272	membrane-bounded organelle	GO_cellular_component_complete	87	0.00034	0.0335	ENSBTAG00000005009	PRELI domain containing 1 (PRELID1)	DOWN
GO	GO:0043273	membrane-bounded organelle	GO_cellular_component_complete	87	0.00034	0.0335	ENSBTAG00000014536	sideroflexin 1(SFXN1)	DOWN
GO	GO:0043274	membrane-bounded organelle	GO_cellular_component_complete	87	0.00034	0.0335	ENSBTAG00000013753	DDRGK domain containing 1 (DDRGK1)	DOWN
GO	GO:0043275	membrane-bounded organelle	GO_cellular_component_complete	87	0.00034	0.0335	ENSBTAG00000005634	LSM2 homolog, U6 small nuclear RNA and mRNA degradation associated (LSM2)	DOWN
GO	GO:0043276	membrane-bounded organelle	GO_cellular_component_complete	87	0.00034	0.0335	ENSBTAG00000017941	NOP2/Sun RNA methyltransferase family member 5 (NSUN5)	DOWN
GO	GO:0043277	membrane-bounded organelle	GO_cellular_component_complete	87	0.00034	0.0335	ENSBTAG00000014064	fibroblast growth factor receptor 2 (FGFR2)	DOWN
GO	GO:0043278	membrane-bounded organelle	GO_cellular_component_complete	87	0.00034	0.0335	ENSBTAG00000019530	Bifunctional peptidase and arginyl-hydroxylase JMJD5 (KDM8)	UP
GO	GO:0043279	membrane-bounded organelle	GO_cellular_component_complete	87	0.00034	0.0335	ENSBTAG00000014814	BRD4 interacting chromatin remodeling complex associated protein like (BICRAL)	DOWN
GO	GO:0043280	membrane-bounded organelle	GO_cellular_component_complete	87	0.00034	0.0335	ENSBTAG00000043559	NADH dehydrogenase subunit 4L(ND4L)	UP
GO	GO:0043281	membrane-bounded organelle	GO_cellular_component_complete	87	0.00034	0.0335	ENSBTAG00000009099	proline rich 14 (PRR14)	DOWN
GO	GO:0043282	membrane-bounded organelle	GO_cellular_component_complete	87	0.00034	0.0335	ENSBTAG00000013942	diacylglycerol lipase alpha (DAGLA)	UP
GO	GO:0043283	membrane-bounded organelle	GO_cellular_component_complete	87	0.00034	0.0335	ENSBTAG00000016427	COMM domain containing 7 (COMMD7)	DOWN
GO	GO:0043284	membrane-bounded organelle	GO_cellular_component_complete	87	0.00034	0.0335	ENSBTAG00000043584	ATP synthase F0 subunit 6(ATP6)	UP
GO	GO:0043285	membrane-bounded organelle	GO_cellular_component_complete	87	0.00034	0.0335	ENSBTAG00000004295	NADH:ubiquinone oxidoreductase subunit A8(NDUFA8)	DOWN
GO	GO:0043286	membrane-bounded organelle	GO_cellular_component_complete	87	0.00034	0.0335	ENSBTAG00000009462	malate dehydrogenase 2(MDH2)	DOWN
GO	GO:0043287	membrane-bounded organelle	GO_cellular_component_complete	87	0.00034	0.0335	ENSBTAG00000043563	NADH dehydrogenase subunit 5(ND5)	UP
GO	GO:0043288	membrane-bounded organelle	GO_cellular_component_complete	87	0.00034	0.0335	ENSBTAG00000013869	SH3 domain binding protein 4 (SH3BP4)	DOWN
GO	GO:0043289	membrane-bounded organelle	GO_cellular_component_complete	87	0.00034	0.0335	ENSBTAG00000001508	SH3 domain containing ring finger 1 (SH3RF1)	DOWN
GO	GO:0043290	membrane-bounded organelle	GO_cellular_component_complete	87	0.00034	0.0335	ENSBTAG00000014325	chromosome 3 C1orf109 homolog (C3H1orf109)	DOWN
GO	GO:0043291	membrane-bounded organelle	GO_cellular_component_complete	87	0.00034	0.0335	ENSBTAG00000006470	tau tubulin kinase 2 (TTBK2)	UP
GO	GO:0043292	membrane-bounded organelle	GO_cellular_component_complete	87	0.00034	0.0335	ENSBTAG00000038139	cerebral endothelial cell adhesion molecule (CERCAM)	UP
GO	GO:0043293	membrane-bounded organelle	GO_cellular_component_complete	87	0.00034	0.0335	ENSBTAG00000014553	ATPase H+ transporting V0 subunit d1(ATP6V0D1)	DOWN
GO	GO:0043294	membrane-bounded organelle	GO_cellular_component_complete	87	0.00034	0.0335	ENSBTAG00000021160	adaptor related protein complex 1 subunit mu 2 (AP1M2)	DOWN
GO	GO:0043295	membrane-bounded organelle	GO_cellular_component_complete	87	0.00034	0.0335	ENSBTAG00000011913	cytoskeleton associated protein 4 (CKAP4)	DOWN
GO	GO:0043296	membrane-bounded organelle	GO_cellular_component_complete	87	0.00034	0.0335	ENSBTAG00000000507	nuclear receptor subfamily 4 group A member 1 (NR4A1)	UP
GO	GO:0043297	membrane-bounded organelle	GO_cellular_component_complete	87	0.00034	0.0335	ENSBTAG00000001600	defective in cullin neddylation 1 domain containing 4 (DCUN1D4)	UP
GO	GO:0043298	membrane-bounded organelle	GO_cellular_component_complete	87	0.00034	0.0335	ENSBTAG00000008186	UBX domain protein 6 (UBXN6)	DOWN
GO	GO:0043299	membrane-bounded organelle	GO_cellular_component_complete	87	0.00034	0.0335	ENSBTAG00000021427	homeobox B3 (HOXB3)	UP
GO	GO:0043300	membrane-bounded organelle	GO_cellular_component_complete	87	0.00034	0.0335	ENSBTAG00000007690	alanine--glyoxylate aminotransferase 2(AGXT2)	DOWN
GO	GO:0043301	membrane-bounded organelle	GO_cellular_component_complete	87	0.00034	0.0335	ENSBTAG00000015504	zinc finger protein 131 (ZNF131)	DOWN
GO	GO:0043302	membrane-bounded organelle	GO_cellular_component_complete	87	0.00034	0.0335	ENSBTAG00000043577	NADH dehydrogenase subunit 4(ND4)	UP
GO	GO:0043303	membrane-bounded organelle	GO_cellular_component_complete	87	0.00034	0.0335	ENSBTAG00000040607	Src like adaptor 2 (SLA2)	UP
GO	GO:0043304	membrane-bounded organelle	GO_cellular_component_complete	87	0.00034	0.0335	ENSBTAG00000012352	poly(ADP-ribose) polymerase family member 16 (PARP16)	UP
GO	GO:0043305	membrane-bounded organelle	GO_cellular_component_complete	87	0.00034	0.0335	ENSBTAG00000007827	REST corepressor 2 (RCOR2)	DOWN
GO	GO:0043306	membrane-bounded organelle	GO_cellular_component_complete	87	0.00034	0.0335	ENSBTAG00000017177	RNA binding motif protein 25 (RBM25)	DOWN
GO	GO:0043307	membrane-bounded organelle	GO_cellular_component_complete	87	0.00034	0.0335	ENSBTAG00000025540	Alpha-ketoglutarate-dependent dioxygenase alkB homolog 7(ALKBH7)	DOWN
GO	GO:0043308	membrane-bounded organelle	GO_cellular_component_complete	87	0.00034	0.0335	ENSBTAG00000003298	leucine zipper tumor suppressor 2 (LZTS2)	UP
GO	GO:0043309	membrane-bounded organelle	GO_cellular_component_complete	87	0.00034	0.0335	ENSBTAG00000015158	integrator complex subunit 14 (INTS14)	UP
GO	GO:0043310	membrane-bounded organelle	GO_cellular_component_complete	87	0.00034	0.0335	ENSBTAG00000019684	nudix hydrolase 3 (NUDT3)	DOWN
GO	GO:0043311	membrane-bounded organelle	GO_cellular_component_complete	87	0.00034	0.0335	ENSBTAG00000014442	mitochondrial ribosome associated GTPase 2(MTG2)	DOWN
GO	GO:0043312	membrane-bounded organelle	GO_cellular_component_complete	87	0.00034	0.0335	ENSBTAG00000043546	NADH dehydrogenase subunit 6(ND6)	UP
GO	GO:0043313	membrane-bounded organelle	GO_cellular_component_complete	87	0.00034	0.0335	ENSBTAG00000046255	ataxin 1 like (ATXN1L)	UP
* This table represents functional analysis of DEGs from the original analysis, before validation by removal of oocyte library three.
