# Supplementary material for: Differential Transcript Profiles in Cumulus-Oocyte Complexes Originating from Pre-Ovulatory Follicles of Varied Physiological Maturity in Beef Cows
Source: Genes (Basel). 2021 Jun 10;12(6):893. doi: 10.3390/genes12060893 (PMC8227736; doi:10.3390/genes12060893)
Supplement: Supplementary file 1 [file genes-12-00893-s001.zip › Table_S4.xlsx]

## Sheet: S4a_small_large
Table S4a: Differentially abundant gene transcripts between small and large follicle cumulus cell pools.
Gene ID	edgeR analysis		DESeq2 analysis		external gene name	description	gene biotype	mean CPM small	mean CPM large
	fold change	nominal P value	fold change	nominal P value
ENSBTAG00000004879	-3.92956	1.56061e-05	-4.10669	4.89464e-06	FOXO4	Bos taurus forkhead box O4 (FOXO4), mRNA. [Source:RefSeq mRNA;Acc:NM_001101277]	protein_coding	10.794	2.69313
ENSBTAG00000019866	-2.82447	0.00694622	-2.63885	0.00719946	NRP1	Bos taurus neuropilin 1 (NRP1), mRNA. [Source:RefSeq mRNA;Acc:NM_001205660]	protein_coding	63.9232	20.0151
ENSBTAG00000045791	-2.71681	0.00279072	-2.71442	0.00290374	ZNF623	zinc finger protein 623 [Source:VGNC Symbol;Acc:VGNC:37316]	protein_coding	6.83884	2.14474
ENSBTAG00000012925	-2.21553	0.00668911	-2.8495	0.00338204	NCAPH	Bos taurus non-SMC condensin I complex subunit H (NCAPH), mRNA. [Source:RefSeq mRNA;Acc:NM_001034213]	protein_coding	8.14217	2.815
ENSBTAG00000012141	-2.14273	0.00595777	-2.23405	0.00607809	RAD9A	RAD9 checkpoint clamp component A [Source:VGNC Symbol;Acc:VGNC:33689]	protein_coding	7.0522	2.5913
ENSBTAG00000038951	-2.05452	0.00775566	-2.13951	0.00735233	ZNF461	zinc finger protein 461 [Source:VGNC Symbol;Acc:VGNC:52286]	protein_coding	7.45967	2.78957
ENSBTAG00000009726	-1.91413	0.00398186	-1.90329	0.00333054	KLHL12	kelch like family member 12 [Source:VGNC Symbol;Acc:VGNC:54442]	protein_coding	7.43599	2.86893
ENSBTAG00000004378	-1.79957	0.00909043	-1.65981	0.00839911	IL23A	Bos taurus interleukin 23 subunit alpha (IL23A), mRNA. [Source:RefSeq mRNA;Acc:NM_001205688]	protein_coding	17.6475	7.05706
ENSBTAG00000010964	-1.76429	0.00758718	-1.93432	0.00657188	STARD5	Bos taurus StAR related lipid transfer domain containing 5 (STARD5), mRNA. [Source:RefSeq mRNA;Acc:NM_001080265]	protein_coding	7.51986	2.9952
ENSBTAG00000007247	-1.69179	0.00751175	-2.33396	0.00307388	NUF2	Bos taurus NDC80 kinetochore complex component NUF2 (NUF2), mRNA. [Source:RefSeq mRNA;Acc:NM_001099011]	protein_coding	13.9397	5.5274
ENSBTAG00000013636	-1.59424	0.00219807	-1.67666	0.00108533	DGKZ	Bos taurus diacylglycerol kinase zeta (DGKZ), mRNA. [Source:RefSeq mRNA;Acc:NM_001278652]	protein_coding	11.9328	4.94426
ENSBTAG00000019265	-1.33742	0.00795911	-1.52869	0.00370508	AGK	acylglycerol kinase [Source:VGNC Symbol;Acc:VGNC:25728]	protein_coding	10.6029	4.68348
ENSBTAG00000008825	-1.20342	0.00121192	-1.22893	0.000331845	POLR3F	RNA polymerase III subunit F [Source:VGNC Symbol;Acc:VGNC:33150]	protein_coding	54.5033	25.6197
ENSBTAG00000011796	-1.15921	0.003076	-1.20107	0.00110054	TRMT5	Bos taurus tRNA methyltransferase 5 (TRMT5), mRNA. [Source:RefSeq mRNA;Acc:NM_001034565]	protein_coding	18.7184	8.85895
ENSBTAG00000015424	-0.985995	0.00192352	-1.08477	0.000365442	WDR12	Bos taurus WD repeat domain 12 (WDR12), mRNA. [Source:RefSeq mRNA;Acc:NM_001075907]	protein_coding	23.9976	12.0761
ENSBTAG00000012484	-0.953594	0.00603457	-1.06776	0.00196368	ENDOG	endonuclease G [Source:VGNC Symbol;Acc:VGNC:28491]	protein_coding	12.2089	6.15146
ENSBTAG00000030403	-0.925486	0.00887923	-0.97308	0.00415101	FIZ1	Bos taurus FLT3 interacting zinc finger 1 (FIZ1), mRNA. [Source:RefSeq mRNA;Acc:NM_001101308]	protein_coding	12.1058	6.23044
ENSBTAG00000021588	-0.924011	0.0092589	-0.989365	0.00469132	SCG2	Bos taurus secretogranin II (SCG2), mRNA. [Source:RefSeq mRNA;Acc:NM_174176]	protein_coding	42.0197	21.631
ENSBTAG00000002699	-0.830406	0.0070448	-0.891378	0.00117356	KIT	Bos taurus KIT proto-oncogene receptor tyrosine kinase (KIT), mRNA. [Source:RefSeq mRNA;Acc:NM_001166484]	protein_coding	214.051	114
ENSBTAG00000000721	-0.799562	0.00944267	-0.857239	0.00519051	GPATCH1	G-patch domain containing 1 [Source:VGNC Symbol;Acc:VGNC:29514]	protein_coding	23.8018	12.9511
ENSBTAG00000018074	-0.728132	0.00264383	-0.77451	0.000517251	VPS72	vacuolar protein sorting 72 homolog [Source:VGNC Symbol;Acc:VGNC:36831]	protein_coding	30.8737	17.0417
ENSBTAG00000002332	-0.72591	0.00912191	-0.751513	0.00426818	LSM5	LSM5 homolog, U6 small nuclear RNA and mRNA degradation associated [Source:VGNC Symbol;Acc:VGNC:31057]	protein_coding	19.225	10.7532
ENSBTAG00000004367	-0.66258	0.00515553	-0.732597	0.000500048	COQ10A	Bos taurus coenzyme Q10A (COQ10A), mRNA. [Source:RefSeq mRNA;Acc:NM_001076130]	protein_coding	19.6611	11.2908
ENSBTAG00000020939	-0.588277	0.00570503	-0.661279	0.00239355	PLAC9	Bos taurus placenta specific 9 (PLAC9), mRNA. [Source:RefSeq mRNA;Acc:NM_001038521]	protein_coding	50.883	29.8478
ENSBTAG00000018538	-0.549896	0.00355055	-0.631161	0.000586537	CEP70	centrosomal protein 70 [Source:VGNC Symbol;Acc:VGNC:27211]	protein_coding	31.0577	18.5154
ENSBTAG00000013874	-0.519948	0.00536413	-0.577029	0.000494031	CFAP20	cilia and flagella associated protein 20 [Source:VGNC Symbol;Acc:VGNC:27240]	protein_coding	23.8688	14.5042
ENSBTAG00000003545	-0.503458	0.00687303	-0.559314	0.00419438	TAF1D	Bos taurus TATA-box binding protein associated factor, RNA polymerase I subunit D (TAF1D), mRNA. [Source:RefSeq mRNA;Acc:NM_001037586]	protein_coding	67.4183	41.2242
ENSBTAG00000019334	-0.492045	0.00982554	-0.524933	0.00370742	KLC2	kinesin light chain 2 [Source:VGNC Symbol;Acc:VGNC:30623]	protein_coding	39.1535	24.2348
ENSBTAG00000009508	-0.409423	0.00418656	-0.48528	0.00110512	SMDT1	Bos taurus single-pass membrane protein with aspartate rich tail 1 (SMDT1), mRNA. [Source:RefSeq mRNA;Acc:NM_001045937]	protein_coding	58.8225	37.7968
ENSBTAG00000023513	-0.370119	0.00673885	-0.470674	0.00154343	DNAJC19	Bos taurus DnaJ heat shock protein family (Hsp40) member C19 (DNAJC19), mRNA. [Source:RefSeq mRNA;Acc:NM_001034458]	protein_coding	53.3553	35.0276
ENSBTAG00000019695	0.223104	0.00656862	0.170788	0.00692093	RLF	Bos taurus rearranged L-myc fusion (RLF), mRNA. [Source:RefSeq mRNA;Acc:NM_001205939]	protein_coding	113.711	157.862
ENSBTAG00000006833	0.231034	0.0081074	0.18601	0.002744	LMAN1	Bos taurus lectin, mannose binding 1 (LMAN1), mRNA. [Source:RefSeq mRNA;Acc:NM_001098943]	protein_coding	225.733	315.55
ENSBTAG00000011435	0.236699	0.00602557	0.196067	0.00242735	NPEPPS	Bos taurus aminopeptidase puromycin sensitive (NPEPPS), mRNA. [Source:RefSeq mRNA;Acc:NM_001193159]	protein_coding	160.607	225.414
ENSBTAG00000001390	0.240034	0.00868124	0.186367	0.00517459	B4GALT4	Bos taurus beta-1,4-galactosyltransferase 4 (B4GALT4), mRNA. [Source:RefSeq mRNA;Acc:NM_001038078]	protein_coding	480.297	675.302
ENSBTAG00000023867	0.246552	0.00939425	0.218559	0.00136867	RC3H2	ring finger and CCCH-type domains 2 [Source:VGNC Symbol;Acc:VGNC:33819]	protein_coding	92.2594	130.803
ENSBTAG00000032996	0.253992	0.0082983	0.200865	0.00849255	P4HA1	Bos taurus prolyl 4-hydroxylase subunit alpha 1 (P4HA1), mRNA. [Source:RefSeq mRNA;Acc:NM_001075770]	protein_coding	282.481	401.027
ENSBTAG00000010871	0.28923	0.00631702	0.245399	0.00447871	ANKHD1	Ankyrin repeat and KH domain containing 1 [Source:NCBI gene;Acc:509490]	protein_coding	120.708	175.748
ENSBTAG00000006396	0.323844	0.0023252	0.24194	0.00793279	GPI	Bos taurus glucose-6-phosphate isomerase (GPI), mRNA. [Source:RefSeq mRNA;Acc:NM_001040471]	protein_coding	275.91	409.403
ENSBTAG00000011833	0.333615	0.0073286	0.304872	0.00239026	GRIA3	Bos taurus glutamate ionotropic receptor AMPA type subunit 3 (GRIA3), mRNA. [Source:RefSeq mRNA;Acc:NM_001206059]	protein_coding	185.883	278.034
ENSBTAG00000022733	0.3411	0.00289055	0.313056	0.000560085	EPM2AIP1	EPM2A interacting protein 1 [Source:VGNC Symbol;Acc:VGNC:28545]	protein_coding	63.5773	95.7409
ENSBTAG00000007545	0.341286	0.00945398	0.322272	0.00635727	PHLPP2	Bos taurus PH domain and leucine rich repeat protein phosphatase 2 (PHLPP2), mRNA. [Source:RefSeq mRNA;Acc:NM_001206193]	protein_coding	118.02	177.503
ENSBTAG00000019782	0.375906	0.00215501	0.275463	0.00969463	TPI1	triosephosphate isomerase 1 [Source:VGNC Symbol;Acc:VGNC:36250]	protein_coding	653.557	999.759
ENSBTAG00000008303	0.378224	0.00166587	0.279184	0.00923143	FKBP1A	Bos taurus FK506 binding protein 1A (FKBP1A), mRNA. [Source:RefSeq mRNA;Acc:NM_001035456]	protein_coding	420.19	643.67
ENSBTAG00000011966	0.379471	0.000430604	0.303332	0.000380453	LAMC1	Bos taurus laminin subunit gamma 1 (LAMC1), mRNA. [Source:RefSeq mRNA;Acc:NM_001206817]	protein_coding	282.066	432.847
ENSBTAG00000045728	0.38022	0.00136621	0.292832	0.00268052	SCD	stearoyl-CoA desaturase [Source:NCBI gene;Acc:280924]	protein_coding	253.857	389.276
ENSBTAG00000023182	0.387962	0.00282838	0.359441	0.00220912	WNK3	Bos taurus WNK lysine deficient protein kinase 3 (WNK3), mRNA. [Source:RefSeq mRNA;Acc:NM_001256587]	protein_coding	66.0864	102.287
ENSBTAG00000015310	0.390197	0.00268659	0.360286	0.0012188	SLC25A36	solute carrier family 25 member 36 [Source:VGNC Symbol;Acc:VGNC:34762]	protein_coding	92.7766	143.507
ENSBTAG00000013108	0.39201	0.00381995	0.331916	0.00754129	HK2	hexokinase 2 [Source:VGNC Symbol;Acc:VGNC:29865]	protein_coding	89.5875	138.531
ENSBTAG00000031500	0.396749	0.00129512	0.302759	0.00747452	SHMT2	Bos taurus serine hydroxymethyltransferase 2 (SHMT2), mRNA. [Source:RefSeq mRNA;Acc:NM_001034282]	protein_coding	111.703	172.793
ENSBTAG00000009407	0.415385	0.00275586	0.35623	0.004019	MBTD1	mbt domain containing 1 [Source:VGNC Symbol;Acc:VGNC:31290]	protein_coding	33.8263	53.0284
ENSBTAG00000005075	0.432123	0.00727539	0.385467	0.00608927	MRPL49	Bos taurus mitochondrial ribosomal protein L49 (MRPL49), mRNA. [Source:RefSeq mRNA;Acc:NM_001014871]	protein_coding	34.463	54.6204
ENSBTAG00000032680	0.432147	0.000353627	0.370349	0.000413178	TMEM63B	Bos taurus transmembrane protein 63B (TMEM63B), mRNA. [Source:RefSeq mRNA;Acc:NM_001163939]	protein_coding	57.0842	90.2158
ENSBTAG00000036262	0.434774	0.000612971	0.363505	0.00124301	GBE1	1,4-alpha-glucan branching enzyme 1 [Source:VGNC Symbol;Acc:VGNC:53570]	protein_coding	74.6049	118.051
ENSBTAG00000002630	0.446573	0.00439782	0.393776	0.00857048	MRTFA	myocardin related transcription factor A [Source:VGNC Symbol;Acc:VGNC:55393]	protein_coding	75.224	119.936
ENSBTAG00000002683	0.44749	0.00256537	0.402588	0.0022991	PFKP	phosphofructokinase, platelet [Source:VGNC Symbol;Acc:VGNC:32775]	protein_coding	37.7531	60.4735
ENSBTAG00000021107	0.450689	0.00532978	0.403476	0.00318384	STXBP5	Bos taurus syntaxin binding protein 5 (STXBP5), mRNA. [Source:RefSeq mRNA;Acc:NM_001191540]	protein_coding	19.1991	30.8128
ENSBTAG00000014906	0.476421	0.00310713	0.439106	0.000738742	VCAN	Bos taurus versican (VCAN), mRNA. [Source:RefSeq mRNA;Acc:NM_181035]	protein_coding	12998.7	20998.4
ENSBTAG00000004211	0.499758	0.000523158	0.427623	0.000787738	TNFRSF1A	Bos taurus TNF receptor superfamily member 1A (TNFRSF1A), mRNA. [Source:RefSeq mRNA;Acc:NM_174674]	protein_coding	32.9965	53.805
ENSBTAG00000017626	0.503361	0.00121706	0.489574	0.00016568	GFPT1	Bos taurus glutamine--fructose-6-phosphate transaminase 1 (GFPT1), mRNA. [Source:RefSeq mRNA;Acc:NM_001109961]	protein_coding	54.9109	90.1573
ENSBTAG00000013099	0.533336	0.00518162	0.447727	0.0081457	ALDOC	aldolase, fructose-bisphosphate C [Source:VGNC Symbol;Acc:VGNC:25823]	protein_coding	23.3584	38.8449
ENSBTAG00000010322	0.559973	0.00211935	0.505601	0.00376004	HYOU1	Bos taurus hypoxia up-regulated 1 (HYOU1), transcript variant 1, mRNA. [Source:RefSeq mRNA;Acc:NM_001206910]	protein_coding	55.1445	93.1106
ENSBTAG00000021935	0.567551	0.00969075	0.549676	0.00555185	ELMOD3	ELMO domain containing 3 [Source:VGNC Symbol;Acc:VGNC:28443]	protein_coding	14.4593	24.7304
ENSBTAG00000009014	0.575618	0.00262887	0.452443	0.00706165	UPK1B	Bos taurus uroplakin 1B (UPK1B), mRNA. [Source:RefSeq mRNA;Acc:NM_174482]	protein_coding	254.191	430.368
ENSBTAG00000004459	0.58558	0.00089875	0.478639	0.00433766	TMEM45A	Bos taurus transmembrane protein 45A (TMEM45A), mRNA. [Source:RefSeq mRNA;Acc:NM_001075405]	protein_coding	49.2129	83.6995
ENSBTAG00000021396	0.588547	0.00260817	0.521426	0.00304359	HEG1	heart development protein with EGF like domains 1 [Source:VGNC Symbol;Acc:VGNC:29803]	protein_coding	171.921	292.962
ENSBTAG00000025964	0.597146	0.00844487	0.577665	0.00645991	MAST4	microtubule associated serine/threonine kinase family member 4 [Source:NCBI gene;Acc:529061]	protein_coding	23.6845	40.6337
ENSBTAG00000021393	0.602676	0.00220852	0.479627	0.00929236	FLRT2	fibronectin leucine rich transmembrane protein 2 [Source:VGNC Symbol;Acc:VGNC:29039]	protein_coding	87.5706	150.115
ENSBTAG00000001652	0.617407	0.00906007	0.565903	0.0059331	SLCO3A1	Bos taurus solute carrier organic anion transporter family member 3A1 (SLCO3A1), mRNA. [Source:RefSeq mRNA;Acc:NM_001001134]	protein_coding	57.4449	99.521
ENSBTAG00000016730	0.626216	0.00191189	0.495339	0.00573583	ANP32E	acidic nuclear phosphoprotein 32 family member E [Source:VGNC Symbol;Acc:VGNC:25959]	protein_coding	39.646	68.5776
ENSBTAG00000007476	0.628734	0.000465499	0.540074	0.00107794	BTRC	Bos taurus beta-transducin repeat containing E3 ubiquitin protein ligase (BTRC), mRNA. [Source:RefSeq mRNA;Acc:NM_001083475]	protein_coding	67.7995	117.707
ENSBTAG00000018517	0.646891	0.00140184	0.580465	0.00276451	VLDLR	very low density lipoprotein receptor [Source:VGNC Symbol;Acc:VGNC:36803]	protein_coding	36.4203	63.7787
ENSBTAG00000007455	0.656981	0.00497857	0.624186	0.00145912	DNASE1L1	Bos taurus deoxyribonuclease 1 like 1 (DNASE1L1), mRNA. [Source:RefSeq mRNA;Acc:NM_001038634]	protein_coding	15.4895	27.5499
ENSBTAG00000012382	0.658922	0.00333717	0.561477	0.00920916	KCTD9	potassium channel tetramerization domain containing 9 [Source:VGNC Symbol;Acc:VGNC:30516]	protein_coding	24.3773	42.7996
ENSBTAG00000008683	0.659702	0.000158345	0.47614	0.00299251	LDHA	Bos taurus lactate dehydrogenase A (LDHA), mRNA. [Source:RefSeq mRNA;Acc:NM_174099]	protein_coding	872.519	1531.88
ENSBTAG00000019839	0.661665	0.000486747	0.644487	2.05974e-05	LTBP1	latent transforming growth factor beta binding protein 1 [Source:VGNC Symbol;Acc:VGNC:31071]	protein_coding	783.958	1379.65
ENSBTAG00000013103	0.678381	0.00528134	0.621779	0.00552578	COL1A1	Bos taurus collagen type I alpha 1 chain (COL1A1), mRNA. [Source:RefSeq mRNA;Acc:NM_001034039]	protein_coding	186.094	329.796
ENSBTAG00000003128	0.695617	0.00808	0.647253	0.00481029	SPATA6	Bos taurus spermatogenesis associated 6 (SPATA6), mRNA. [Source:RefSeq mRNA;Acc:NM_001046371]	protein_coding	16.6914	29.953
ENSBTAG00000024888	0.719012	0.00128733	0.609019	0.0044913	PDE5A	phosphodiesterase 5A [Source:VGNC Symbol;Acc:VGNC:32678]	protein_coding	156.271	281.356
ENSBTAG00000016640	0.728068	0.0020647	0.637119	0.00421225	HEATR3	Bos taurus HEAT repeat containing 3 (HEATR3), mRNA. [Source:RefSeq mRNA;Acc:NM_001078021]	protein_coding	24.7762	44.9619
ENSBTAG00000007375	0.760055	0.00270814	0.72342	0.00194906	MIF	Bos taurus macrophage migration inhibitory factor (MIF), mRNA. [Source:RefSeq mRNA;Acc:NM_001033608]	protein_coding	23.2918	42.9539
ENSBTAG00000010304	0.762961	0.0063018	0.726865	0.00812618	CHKA	choline kinase alpha [Source:VGNC Symbol;Acc:VGNC:27295]	protein_coding	23.6104	43.3232
ENSBTAG00000017804	0.780948	0.0019611	0.643693	0.00673153	BNIP3	BCL2 interacting protein 3 [Source:VGNC Symbol;Acc:VGNC:26533]	protein_coding	163.417	301.384
ENSBTAG00000000210	0.780994	0.000348966	0.692164	0.00105177	ARHGAP31	Bos taurus Rho GTPase activating protein 31 (ARHGAP31), mRNA. [Source:RefSeq mRNA;Acc:NM_001205810]	protein_coding	96.4657	178.203
ENSBTAG00000030674	0.832564	0.000744273	0.693167	0.00355041	AK4	Bos taurus adenylate kinase 4 (AK4), mRNA. [Source:RefSeq mRNA;Acc:NM_001077933]	protein_coding	27.4687	51.7319
ENSBTAG00000006031	0.853572	0.00390177	0.744713	0.00571893	ADGRV1	adhesion G protein-coupled receptor V1 [Source:VGNC Symbol;Acc:VGNC:25673]	protein_coding	55.0917	104.62
ENSBTAG00000014912	0.938846	0.00840741	0.912164	0.00875683	FMOD	fibromodulin [Source:VGNC Symbol;Acc:VGNC:29054]	protein_coding	10.1591	20.1781
ENSBTAG00000017461	0.940987	0.00130318	0.746603	0.00764573	SLC16A3	Bos taurus solute carrier family 16 member 3 (SLC16A3), mRNA. [Source:RefSeq mRNA;Acc:NM_001109980]	protein_coding	39.2121	76.4438
ENSBTAG00000009987	1.00092	0.00287652	0.866749	0.00573474	ITGB3	Bos taurus integrin subunit beta 3 (ITGB3), mRNA. [Source:RefSeq mRNA;Acc:NM_001206490]	protein_coding	8.21604	16.2948
ENSBTAG00000004118	1.00802	0.000754082	0.862663	0.00168635	ALAS1	5'-aminolevulinate synthase 1 [Source:VGNC Symbol;Acc:VGNC:25803]	protein_coding	15.0311	30.0624
ENSBTAG00000015939	1.07007	0.00513855	1.01621	0.00418256	NECTIN1	nectin cell adhesion molecule 1 [Source:VGNC Symbol;Acc:VGNC:54888]	protein_coding	4.75053	9.82818
ENSBTAG00000019848	1.07835	0.00165818	0.986331	0.0020316	UNG	uracil DNA glycosylase [Source:VGNC Symbol;Acc:VGNC:36677]	protein_coding	7.8565	16.346
ENSBTAG00000044040	1.08627	0.00572405	0.975096	0.00811687	PDAP1	PDGFA associated protein 1 [Source:VGNC Symbol;Acc:VGNC:32655]	protein_coding	4.22408	8.63307
ENSBTAG00000020252	1.08783	0.00675184	1.10859	0.00538704	NLGN2	Bos taurus neuroligin 2 (NLGN2), mRNA. [Source:RefSeq mRNA;Acc:NM_001191242]	protein_coding	16.7736	34.9592
ENSBTAG00000037686	1.10579	0.000353787	1.05558	0.000402702	SRPX2	sushi repeat containing protein X-linked 2 [Source:HGNC Symbol;Acc:HGNC:30668]	protein_coding	15.8135	33.1536
ENSBTAG00000014088	1.10954	0.00512958	0.964461	0.00829701	MBNL3	muscleblind like splicing regulator 3 [Source:VGNC Symbol;Acc:VGNC:31285]	protein_coding	13.4613	28.1764
ENSBTAG00000031503	1.11681	0.000128035	0.961145	0.000432155	NDUFA4L2	Bos taurus NDUFA4, mitochondrial complex associated like 2 (NDUFA4L2), mRNA. [Source:RefSeq mRNA;Acc:NM_001113305]	protein_coding	171.023	355.865
ENSBTAG00000009617	1.12283	2.19468e-06	0.983137	2.13694e-05	SLC2A1	Bos taurus solute carrier family 2 member 1 (SLC2A1), mRNA. [Source:RefSeq mRNA;Acc:NM_174602]	protein_coding	112.93	235.573
ENSBTAG00000039958	1.16203	0.00189734	1.02296	0.00394525	GYS1	Bos taurus glycogen synthase 1 (GYS1), mRNA. [Source:RefSeq mRNA;Acc:NM_001101299]	protein_coding	37.9579	80.112
ENSBTAG00000030839	1.16339	0.00786676	1.12761	0.00559397	MUM1	melanoma associated antigen (mutated) 1 [Source:NCBI gene;Acc:513471]	protein_coding	8.75543	18.7774
ENSBTAG00000047604	1.20475	0.0013749	1.12246	0.00150587	HSD17B1	Bos taurus hydroxysteroid 17-beta dehydrogenase 1 (HSD17B1), mRNA. [Source:RefSeq mRNA;Acc:NM_001102365]	protein_coding	16.866	36.1964
ENSBTAG00000012996	1.22554	0.00380709	1.21714	0.00236715	RNF11	ring finger protein 11 [Source:VGNC Symbol;Acc:340009]	protein_coding	7.07255	15.6845
ENSBTAG00000019062	1.24133	0.00688237	1.24899	0.00534778	FCHSD2	FCH and double SH3 domains 2 [Source:VGNC Symbol;Acc:VGNC:28937]	protein_coding	5.58694	12.1358
ENSBTAG00000000877	1.31952	0.0005606	1.22032	0.000676619	ETFBKMT	electron transfer flavoprotein subunit beta lysine methyltransferase [Source:VGNC Symbol;Acc:VGNC:28620]	protein_coding	12.2704	27.2496
ENSBTAG00000030301	1.33451	0.00585964	1.24308	0.00765587	MAP7D1	MAP7 domain containing 1 [Source:VGNC Symbol;Acc:VGNC:55611]	protein_coding	5.21884	11.7931
ENSBTAG00000004246	1.34606	0.00190864	1.32279	0.00154261	H6PD	splA/ryanodine receptor domain and SOCS box containing 1 [Source:NCBI gene;Acc:504407]	protein_coding	9.5375	21.5833
ENSBTAG00000009391	1.37839	0.00098138	1.27374	0.000847186	ADPRH	Bos taurus phospholipase A1 member A (PLA1A), mRNA. [Source:RefSeq mRNA;Acc:NM_001015610]	protein_coding	8.57198	19.3288
ENSBTAG00000008535	1.38481	0.00145242	1.34192	0.000984988	SOCS7	suppressor of cytokine signaling 7 [Source:VGNC Symbol;Acc:VGNC:35125]	protein_coding	10.5155	23.9441
ENSBTAG00000014788	1.49315	0.00234406	1.32528	0.00879343	AKAP12	A-kinase anchoring protein 12 [Source:VGNC Symbol;Acc:VGNC:25782]	protein_coding	62.9915	146.996
ENSBTAG00000021912	1.5146	0.00590041	1.33524	0.00828084	DUSP7	Bos taurus dual specificity phosphatase 7 (DUSP7), mRNA. [Source:RefSeq mRNA;Acc:NM_001101294]	protein_coding	11.9273	28.1215
ENSBTAG00000009124	1.5413	0.00520002	1.50973	0.00487549	FEZ1	fasciculation and elongation protein zeta 1 [Source:VGNC Symbol;Acc:VGNC:28957]	protein_coding	6.03613	14.3277
ENSBTAG00000020713	1.57024	0.00413126	1.45485	0.00670277	BACH2	BTB domain and CNC homolog 2 [Source:VGNC Symbol;Acc:VGNC:26403]	protein_coding	7.03435	16.8464
ENSBTAG00000037781	1.91489	0.00669611	1.87198	0.00989418	FKBPL	Bos taurus FK506 binding protein like (FKBPL), mRNA. [Source:RefSeq mRNA;Acc:NM_001101982]	protein_coding	2.64217	7.00951
ENSBTAG00000016721	2.05687	0.00536823	2.1625	0.00468835	LOC783540	zinc finger protein 791 [Source:NCBI gene;Acc:783540]	protein_coding	3.72106	10.3574
ENSBTAG00000002942	2.0579	0.00589249	1.93281	0.00860286	SLC2A10	solute carrier family 2 member 10 [Source:VGNC Symbol;Acc:VGNC:34797]	protein_coding	3.34118	9.20491
ENSBTAG00000003986	2.06366	0.00117777	1.88148	0.00249001	CXXC5	Bos taurus CXXC finger protein 5 (CXXC5), mRNA. [Source:RefSeq mRNA;Acc:NM_001038176]	protein_coding	3.19792	8.65571
ENSBTAG00000011684	2.12151	0.000891348	2.13017	0.000660973	RAB11FIP1	RAB11 family interacting protein 1 [Source:VGNC Symbol;Acc:VGNC:33616]	protein_coding	5.67546	15.8649
ENSBTAG00000032603	2.21302	0.00311311	2.13545	0.00490648	LOC515333	multidrug resistance-associated protein 4 [Source:NCBI gene;Acc:515333]	protein_coding	3.21393	9.11412
ENSBTAG00000021217	2.27007	0.00138181	2.28518	0.00119295	COL11A1	Bos taurus collagen type XI alpha 1 chain (COL11A1), mRNA. [Source:RefSeq mRNA;Acc:NM_001166509]	protein_coding	2.41609	7.09765
ENSBTAG00000001112	2.33639	0.00511536	2.07944	0.00943856	SMOX	Bos taurus spermine oxidase (SMOX), mRNA. [Source:RefSeq mRNA;Acc:NM_001205439]	protein_coding	3.12458	8.97326
ENSBTAG00000047561	2.54706	0.0056106	2.48063	0.00583828			protein_coding	4.8354	14.6625
ENSBTAG00000016910	2.80127	0.00107105	2.7751	0.00186634	EEF1AKMT3	Bos taurus EEF1A lysine methyltransferase 3 (EEF1AKMT3), mRNA. [Source:RefSeq mRNA;Acc:NM_001103340]	protein_coding	2.1702	6.92668
ENSBTAG00000019137	3.33017	0.00494986	3.43297	0.00166782	SCN7A	sodium voltage-gated channel alpha subunit 7 [Source:VGNC Symbol;Acc:VGNC:34353]	protein_coding	6.25821	22.4717
ENSBTAG00000019125	3.34786	0.00771228	3.54615	0.00495027	SLC1A1	solute carrier family 1 member 1 [Source:VGNC Symbol;Acc:VGNC:34711]	protein_coding	2.98609	10.8599
ENSBTAG00000004838	3.39066	0.000609152	3.4903	0.00104922	IRX5	iroquois homeobox 5 [Source:VGNC Symbol;Acc:VGNC:30289]	protein_coding	1.76563	6.58751
ENSBTAG00000021855	3.87761	0.00357176	3.34289	0.00684734	ANO3	anoctamin 3 [Source:VGNC Symbol;Acc:VGNC:25952]	protein_coding	2.56079	9.65232
ENSBTAG00000039151	4.40829	0.00213892	4.16268	0.00421697	HTR1F	Bos taurus 5-hydroxytryptamine receptor 1F (HTR1F), mRNA. [Source:RefSeq mRNA;Acc:NM_001206605]	protein_coding	1.96705	8.49245
ENSBTAG00000014402	9.8986	9.41525e-12	9.66993	5.69454e-12	GIMAP8	GTPase, IMAP family member 8 [Source:VGNC Symbol;Acc:VGNC:29357]	protein_coding	2.60792	23.2462
ENSBTAG00000019241	9.91621	0.000120487	10.2707	0.000118252	FGF11	fibroblast growth factor 11 [Source:VGNC Symbol;Acc:VGNC:28971]	protein_coding	0.907218	8.4626

## Sheet: S4b_small_spont
Table S4b: Differentially abundant gene transcripts between small and spontaneous follicle cumulus cell pools.
Gene ID	edgeR analysis		DESeq2 analysis		external gene name	description	gene biotype	mean CPM small	mean CPM spontaneous
	fold change	nominal P value	fold change	nominal P value
ENSBTAG00000000414	-3.14693	0.00111401	-3.57776	0.000651652	FUT6	fucosyltransferase 6 [Source:NCBI gene;Acc:338077]	protein_coding	5.72281	1.67745
ENSBTAG00000009427	-1.98288	0.00128648	-2.31771	0.000180009	PPM1D	Bos taurus protein phosphatase, Mg2+/Mn2+ dependent 1D (PPM1D), mRNA. [Source:RefSeq mRNA;Acc:NM_001191444]	protein_coding	17.7794	6.70167
ENSBTAG00000021071	-1.93333	0.00150824	-2.29798	0.000470802	TRIM8	Bos taurus tripartite motif containing 8 (TRIM8), mRNA. [Source:RefSeq mRNA;Acc:NM_001191476]	protein_coding	6.15707	2.39108
ENSBTAG00000016319	-1.55571	0.00456346	-1.87787	0.00100555	CYB5D2	cytochrome b5 domain containing 2 [Source:VGNC Symbol;Acc:VGNC:50262]	protein_coding	17.7436	7.52132
ENSBTAG00000006252	-1.52575	0.00832078	-1.75949	0.00263936	LOC534630	RNA binding motif protein, X-linked 2-like [Source:NCBI gene;Acc:534630]	protein_coding	21.3416	9.06727
ENSBTAG00000038706	-1.45496	0.00807897	-2.13733	0.00174873	MT1E	metallothionein 1E [Source:NCBI gene;Acc:768319]	protein_coding	25.5004	10.9515
ENSBTAG00000044022	-1.13626	0.00192908	-1.36023	0.000100219	KIAA1671	KIAA1671 [Source:VGNC Symbol;Acc:VGNC:30575]	protein_coding	40.633	19.4693
ENSBTAG00000010515	-1.05055	0.00549557	-1.29628	0.000574967	FBXW5	Bos taurus F-box and WD repeat domain containing 5 (FBXW5), mRNA. [Source:RefSeq mRNA;Acc:NM_001192469]	protein_coding	21.7608	10.7701
ENSBTAG00000016128	-0.987999	0.00419881	-1.24342	0.000388371	GGA3	golgi associated, gamma adaptin ear containing, ARF binding protein 3 [Source:VGNC Symbol;Acc:VGNC:29337]	protein_coding	15.325	7.71894
ENSBTAG00000005408	-0.970684	0.00100851	-1.22097	5.69355e-05	CLK1	CDC like kinase 1 [Source:VGNC Symbol;Acc:VGNC:27448]	protein_coding	163.495	82.6657
ENSBTAG00000008825	-0.949875	0.00627514	-1.16543	0.000806429	POLR3F	RNA polymerase III subunit F [Source:VGNC Symbol;Acc:VGNC:33150]	protein_coding	54.5033	27.8543
ENSBTAG00000043571	-0.785343	0.00530428	-1.41354	0.005746	ND2	NADH dehydrogenase subunit 2 [Source:NCBI gene (formerly Entrezgene);Acc:3283878]	protein_coding	6194.18	3348.61
ENSBTAG00000043546	-0.625848	0.00273072	-1.12464	0.000485915	ND6	NADH dehydrogenase subunit 6 [Source:NCBI gene (formerly Entrezgene);Acc:3283888]	protein_coding	2252.28	1300.45
ENSBTAG00000021048	-0.609996	0.00224244	-0.826428	2.84177e-05	ADM	Bos taurus adrenomedullin (ADM), mRNA. [Source:RefSeq mRNA;Acc:NM_173888]	protein_coding	675.296	393.224
ENSBTAG00000009305	-0.580745	0.00480416	-0.804665	0.000405042	ANKRD27	Bos taurus ankyrin repeat domain 27 (ANKRD27), mRNA. [Source:RefSeq mRNA;Acc:NM_001102532]	protein_coding	56.981	33.7044
ENSBTAG00000015124	-0.515385	0.00880406	-0.692761	0.000567592	ARGLU1	arginine and glutamate rich 1 [Source:VGNC Symbol;Acc:VGNC:26072]	protein_coding	52.8822	32.2437
ENSBTAG00000007648	-0.394516	0.00859272	-0.72491	0.00135685	NET1	neuroepithelial cell transforming 1 [Source:VGNC Symbol;Acc:VGNC:32010]	protein_coding	146.13	94.2358
ENSBTAG00000047766	-0.289607	0.00545178	-0.515078	0.000281851	G0S2	G0/G1 switch 2 [Source:VGNC Symbol;Acc:VGNC:29174]	protein_coding	100.309	68.9029
ENSBTAG00000003443	0.268406	0.00249174	0.125831	0.00984425	USP46	Bos taurus ubiquitin specific peptidase 46 (USP46), mRNA. [Source:RefSeq mRNA;Acc:NM_001192444]	protein_coding	353.472	506.49
ENSBTAG00000016481	0.350318	0.000787379	0.180514	0.0052862	CALU	calumenin [Source:VGNC Symbol;Acc:VGNC:26717]	protein_coding	325.916	491.2
ENSBTAG00000010760	0.353013	0.00254743	0.204794	0.00344747	REV3L	Bos taurus REV3 like, DNA directed polymerase zeta catalytic subunit (REV3L), mRNA. [Source:RefSeq mRNA;Acc:NM_001206172]	protein_coding	386.539	584.082
ENSBTAG00000021323	0.366162	0.0015554	0.202311	0.00852663	AGFG1	Bos taurus ArfGAP with FG repeats 1 (AGFG1), mRNA. [Source:RefSeq mRNA;Acc:NM_001038171]	protein_coding	114.63	174.582
ENSBTAG00000013204	0.389148	0.00117093	0.235135	0.00310424	ATP13A3	ATPase 13A3 [Source:VGNC Symbol;Acc:VGNC:26279]	protein_coding	77.9755	120.524
ENSBTAG00000003342	0.413375	0.00305638	0.246182	0.0080655	AMD1	Bos taurus adenosylmethionine decarboxylase 1 (AMD1), mRNA. [Source:RefSeq mRNA;Acc:NM_173990]	protein_coding	150.693	235.647
ENSBTAG00000006928	0.416239	0.000390336	0.222129	0.00548818	OAT	Bos taurus ornithine aminotransferase (OAT), mRNA. [Source:RefSeq mRNA;Acc:NM_001034240]	protein_coding	364.686	570.25
ENSBTAG00000000087	0.430954	0.000173194	0.233587	0.00198244	HSD17B12	hydroxysteroid 17-beta dehydrogenase 12 [Source:VGNC Symbol;Acc:VGNC:54883]	protein_coding	178.408	281.193
ENSBTAG00000026283	0.441301	0.00390496	0.278514	0.00715262	ASPH	Bos taurus aspartate beta-hydroxylase (ASPH), mRNA. [Source:RefSeq mRNA;Acc:NM_174757]	protein_coding	288.696	458.083
ENSBTAG00000008389	0.473129	0.00492843	0.323272	0.00871958	HTRA1	HtrA serine peptidase 1 [Source:VGNC Symbol;Acc:VGNC:30004]	protein_coding	78.8966	127.628
ENSBTAG00000001928	0.485982	0.000432716	0.300922	0.000335166	PDIA6	Bos taurus protein disulfide isomerase family A member 6 (PDIA6), mRNA. [Source:RefSeq mRNA;Acc:NM_001206345]	protein_coding	702.827	1139.93
ENSBTAG00000018207	0.508028	0.00130509	0.321325	0.00522638	M6PR	mannose-6-phosphate receptor, cation dependent [Source:VGNC Symbol;Acc:VGNC:31125]	protein_coding	105.834	173.708
ENSBTAG00000017143	0.509793	3.78181e-05	0.298797	0.000219013	PDIA4	Bos taurus protein disulfide isomerase family A member 4 (PDIA4), mRNA. [Source:RefSeq mRNA;Acc:NM_001045879]	protein_coding	207.229	340.031
ENSBTAG00000011613	0.512157	0.00517421	0.342618	0.009567	PLS3	Bos taurus plastin 3 (PLS3), mRNA. [Source:RefSeq mRNA;Acc:NM_001045923]	protein_coding	193.227	317.783
ENSBTAG00000004059	0.520597	0.00141657	0.354397	0.0010013	SOAT1	Bos taurus sterol O-acyltransferase 1 (SOAT1), mRNA. [Source:RefSeq mRNA;Acc:NM_001034206]	protein_coding	152.141	251.328
ENSBTAG00000017759	0.534471	0.00107878	0.359029	0.00169849	LOC515570	nodal modulator 1 [Source:NCBI gene;Acc:515570]	protein_coding	224.737	373.543
ENSBTAG00000015230	0.542247	0.00109969	0.358309	0.00340857	PLA2G12A	Bos taurus phospholipase A2 group XIIA (PLA2G12A), mRNA. [Source:RefSeq mRNA;Acc:NM_001098063]	protein_coding	29.5706	49.3527
ENSBTAG00000019488	0.54314	0.0023684	0.357385	0.00499006	USP6NL	Bos taurus USP6 N-terminal like (USP6NL), mRNA. [Source:RefSeq mRNA;Acc:NM_001192695]	protein_coding	24.1464	40.3016
ENSBTAG00000019929	0.576114	0.00142115	0.369444	0.00894783	ITGAV	integrin subunit alpha V [Source:VGNC Symbol;Acc:VGNC:30323]	protein_coding	491.148	831.204
ENSBTAG00000020984	0.606571	0.00294183	0.419678	0.00760362	RAPGEF4	Bos taurus Rap guanine nucleotide exchange factor 4 (RAPGEF4), mRNA. [Source:RefSeq mRNA;Acc:NM_001192902]	protein_coding	21.2609	36.8206
ENSBTAG00000001246	0.633777	2.26574e-05	0.412581	7.37108e-05	ATP1A1	Bos taurus ATPase Na+/K+ transporting subunit alpha 1 (ATP1A1), mRNA. [Source:RefSeq mRNA;Acc:NM_001076798]	protein_coding	303.199	526.877
ENSBTAG00000009770	0.650072	0.000592397	0.423887	0.0033703	GPD2	Bos taurus glycerol-3-phosphate dehydrogenase 2 (GPD2), mRNA. [Source:RefSeq mRNA;Acc:NM_001100296]	protein_coding	39.683	69.6982
ENSBTAG00000022155	0.677355	0.000119591	0.414356	0.00351447	FSTL1	Bos taurus follistatin like 1 (FSTL1), mRNA. [Source:RefSeq mRNA;Acc:NM_001017950]	protein_coding	282.063	499.08
ENSBTAG00000001683	0.714379	0.000605392	0.450634	0.00984419	FAM171B	Family with sequence similarity 171 member B [Source:VGNC Symbol;Acc:VGNC:28758]	protein_coding	84.5445	151.938
ENSBTAG00000003490	0.715383	0.00382378	0.508855	0.00521964	ELMO1	Bos taurus engulfment and cell motility 1 (ELMO1), transcript variant 2, mRNA. [Source:RefSeq mRNA;Acc:NM_001024505]	protein_coding	16.2687	29.7436
ENSBTAG00000021543	0.767176	8.29411e-05	0.542207	0.000130148	MDFIC	Bos taurus MyoD family inhibitor domain containing (MDFIC), mRNA. [Source:RefSeq mRNA;Acc:NM_001101102]	protein_coding	172.45	317.102
ENSBTAG00000012976	0.783119	0.00151599	0.563975	0.00272102	WLS	Bos taurus wntless Wnt ligand secretion mediator (WLS), mRNA. [Source:RefSeq mRNA;Acc:NM_001192651]	protein_coding	17.0679	31.7506
ENSBTAG00000010644	0.80587	0.00031038	0.524676	0.0047315	CHST11	carbohydrate sulfotransferase 11 [Source:VGNC Symbol;Acc:VGNC:27339]	protein_coding	149.027	277.732
ENSBTAG00000000859	0.817435	5.13968e-05	0.551832	0.00081201	SLC38A1	solute carrier family 38 member 1 [Source:VGNC Symbol;Acc:VGNC:34846]	protein_coding	117.612	220.341
ENSBTAG00000013108	0.819965	5.77154e-05	0.549973	0.00100065	HK2	hexokinase 2 [Source:VGNC Symbol;Acc:VGNC:29865]	protein_coding	89.5875	168.048
ENSBTAG00000025853	0.877928	0.00087723	0.580124	0.00750601	HOMER1	Bos taurus homer scaffold protein 1 (HOMER1), mRNA. [Source:RefSeq mRNA;Acc:NM_001076052]	protein_coding	75.1209	144.046
ENSBTAG00000032914	0.965426	0.000665016	0.699341	0.002252	SLC11A2	Bos taurus solute carrier family 11 member 2 (SLC11A2), mRNA. [Source:RefSeq mRNA;Acc:NM_001101103]	protein_coding	34.8332	69.1203
ENSBTAG00000002827	0.977078	2.27713e-05	0.574308	0.00510731	ACAT2	Bos taurus acetyl-CoA acetyltransferase 2 (ACAT2), mRNA. [Source:RefSeq mRNA;Acc:NM_001075549]	protein_coding	69.6893	137.638
ENSBTAG00000003362	1.04681	5.40994e-07	0.677238	9.72401e-05	HSP90B1	Bos taurus heat shock protein 90 beta family member 1 (HSP90B1), mRNA. [Source:RefSeq mRNA;Acc:NM_174700]	protein_coding	2111.32	4289.8
ENSBTAG00000027991	1.08821	0.000245601	0.747528	0.00334093	ANAPC1	anaphase promoting complex subunit 1 [Source:VGNC Symbol;Acc:VGNC:25879]	protein_coding	130.92	269.777
ENSBTAG00000000094	1.18607	0.000418222	0.942671	0.000310143	ATPAF1	ATP synthase mitochondrial F1 complex assembly factor 1 [Source:VGNC Symbol;Acc:VGNC:26332]	protein_coding	10.4063	22.4491
ENSBTAG00000038112	1.27904	0.000140695	1.01152	0.000306974	LOC100850276	UL16-binding protein 3-like [Source:NCBI gene;Acc:100850276]	protein_coding	16.9086	37.3756
ENSBTAG00000022920	1.28086	0.000201625	0.926267	0.00156374	RNF128	Bos taurus ring finger protein 128, E3 ubiquitin protein ligase (RNF128), mRNA. [Source:RefSeq mRNA;Acc:NM_001076071]	protein_coding	46.1991	101.393
ENSBTAG00000014376	1.31229	0.00232754	0.996797	0.00622521	ANKRD13A	ankyrin repeat domain 13A [Source:VGNC Symbol;Acc:VGNC:25912]	protein_coding	7.27788	15.9513
ENSBTAG00000019289	1.36221	0.0001758	0.935026	0.00218434	ITGA2	Bos taurus integrin subunit alpha 2 (ITGA2), mRNA. [Source:RefSeq mRNA;Acc:NM_001166499]	protein_coding	311.122	698.424
ENSBTAG00000016912	1.51743	0.000446309	1.16138	0.00159187	TSFM	Bos taurus Ts translation elongation factor, mitochondrial (TSFM), mRNA. [Source:RefSeq mRNA;Acc:NM_174204]	protein_coding	5.25155	12.166
ENSBTAG00000003832	1.58132	0.000651885	1.26035	0.00172971	MFAP2	microfibril associated protein 2 [Source:VGNC Symbol;Acc:VGNC:31422]	protein_coding	7.08188	17.1675
ENSBTAG00000014913	1.69032	0.00289092	1.44898	0.00440837	SRD5A3	Bos taurus steroid 5 alpha-reductase 3 (SRD5A3), mRNA. [Source:RefSeq mRNA;Acc:NM_001206090]	protein_coding	4.12492	10.5356
ENSBTAG00000004303	1.79996	6.93638e-06	1.38107	7.73645e-05	SLC27A2	solute carrier family 27 member 2 [Source:VGNC Symbol;Acc:VGNC:34786]	protein_coding	50.7023	128.768
ENSBTAG00000001696	1.83967	0.00214748	1.5577	0.00386056	RBM46	Bos taurus RNA binding motif protein 46 (RBM46), mRNA. [Source:RefSeq mRNA;Acc:NM_001192719]	protein_coding	6.93366	18.0323
ENSBTAG00000005691	1.86452	0.000698521	1.46479	0.00134015	FGF2	Bos taurus fibroblast growth factor 2 (FGF2), mRNA. [Source:RefSeq mRNA;Acc:NM_174056]	protein_coding	41.4376	106.991
ENSBTAG00000006031	1.86681	4.17199e-05	1.43506	0.000245147	ADGRV1	adhesion G protein-coupled receptor V1 [Source:VGNC Symbol;Acc:VGNC:25673]	protein_coding	55.0917	141.98
ENSBTAG00000016465	1.89742	8.02086e-06	1.30386	0.000865752	DHCR7	Bos taurus 7-dehydrocholesterol reductase (DHCR7), mRNA. [Source:RefSeq mRNA;Acc:NM_001014927]	protein_coding	29.6308	76.4975
ENSBTAG00000014370	1.91871	2.51054e-05	1.57528	7.19908e-05	NETO2	neuropilin and tolloid like 2 [Source:VGNC Symbol;Acc:VGNC:32012]	protein_coding	14.029	37.2744
ENSBTAG00000004399	1.9189	0.00365823	1.62044	0.00838742	LRRN3	leucine rich repeat neuronal 3 [Source:VGNC Symbol;Acc:VGNC:31040]	protein_coding	3.71069	9.91059
ENSBTAG00000010529	1.96668	0.000120418	1.35856	0.00284079	FZD6	frizzled class receptor 6 [Source:VGNC Symbol;Acc:VGNC:29170]	protein_coding	20.2272	52.9185
ENSBTAG00000020705	2.11027	0.00435181	1.90522	0.00575493	PRSS12	Bos taurus serine protease 12 (PRSS12), mRNA. [Source:RefSeq mRNA;Acc:NM_001193222]	protein_coding	4.51953	12.7385
ENSBTAG00000020713	2.11647	0.00125027	1.63259	0.00582173	BACH2	BTB domain and CNC homolog 2 [Source:VGNC Symbol;Acc:VGNC:26403]	protein_coding	7.03435	19.2777
ENSBTAG00000007743	2.15402	0.00161917	1.69119	0.00603921	PUS7	Bos taurus pseudouridylate synthase 7 (PUS7), mRNA. [Source:RefSeq mRNA;Acc:NM_001076939]	protein_coding	6.4557	17.774
ENSBTAG00000005482	2.30401	0.00122696	1.72048	0.00736272	TMEM135	transmembrane protein 135 [Source:VGNC Symbol;Acc:VGNC:56288]	protein_coding	3.12633	8.6642
ENSBTAG00000019368	2.34943	1.38076e-07	1.79098	1.00817e-05	IGFBP7	insulin like growth factor binding protein 7 [Source:VGNC Symbol;Acc:VGNC:30089]	protein_coding	209.723	606.305
ENSBTAG00000033153	2.36536	0.00227088	2.11845	0.00312567	GRIK2	glutamate ionotropic receptor kainate type subunit 2 [Source:VGNC Symbol;Acc:VGNC:29643]	protein_coding	6.37891	18.6982
ENSBTAG00000031332	2.38343	0.00407132	2.04604	0.00949418	RBKS	ribokinase [Source:VGNC Symbol;Acc:VGNC:33780]	protein_coding	3.53301	10.3668
ENSBTAG00000009639	2.38603	0.000144309	1.79206	0.00168668	SMPD3	Bos taurus sphingomyelin phosphodiesterase 3 (SMPD3), mRNA. [Source:RefSeq mRNA;Acc:NM_001192363]	protein_coding	7.17971	20.7002
ENSBTAG00000020931	2.66999	0.0044363	2.36747	0.00567346	CHN2	chimerin 2 [Source:VGNC Symbol;Acc:VGNC:50060]	protein_coding	6.89105	21.4968
ENSBTAG00000010606	2.69141	0.00116741	2.3605	0.0030777	PPP1R3B	Bos taurus protein phosphatase 1 regulatory subunit 3B (PPP1R3B), mRNA. [Source:RefSeq mRNA;Acc:NM_001103247]	protein_coding	2.69572	8.58141
ENSBTAG00000005111	2.73039	0.0042755	2.28441	0.0096547	BMP2	bone morphogenetic protein 2 [Source:VGNC Symbol;Acc:VGNC:26517]	protein_coding	4.95928	15.6899
ENSBTAG00000021217	2.76974	0.000571705	2.48292	0.00105825	COL11A1	Bos taurus collagen type XI alpha 1 chain (COL11A1), mRNA. [Source:RefSeq mRNA;Acc:NM_001166509]	protein_coding	2.41609	7.92133
ENSBTAG00000017592	2.77354	0.0022354	2.32382	0.00660845	GPAT3	Bos taurus glycerol-3-phosphate acyltransferase 3 (GPAT3), mRNA. [Source:RefSeq mRNA;Acc:NM_001192514]	protein_coding	31.9427	101.516
ENSBTAG00000007651	2.77356	0.00136856	2.32724	0.00491316	TARSL2	Bos taurus threonyl-tRNA synthetase like 2 (TARSL2), mRNA. [Source:RefSeq mRNA;Acc:NM_001102089]	protein_coding	3.38309	10.9819
ENSBTAG00000003301	2.80665	0.00471458	2.43197	0.00959073	NCAM2	neural cell adhesion molecule 2 [Source:VGNC Symbol;Acc:VGNC:31899]	protein_coding	4.06504	13.2245
ENSBTAG00000006910	3.1053	0.00228642	2.36803	0.0092203	ASRGL1	Bos taurus asparaginase like 1 (ASRGL1), mRNA. [Source:RefSeq mRNA;Acc:NM_001077035]	protein_coding	3.82809	12.5861
ENSBTAG00000032875	3.37058	0.00017937	2.65351	0.0014327	BEX2	Bos taurus brain expressed X-linked 2 (BEX2), mRNA. [Source:RefSeq mRNA;Acc:NM_001077034]	protein_coding	6.62392	23.3152
ENSBTAG00000002179	3.56569	4.07785e-05	2.98624	0.000227444	C10H15orf41	chromosome 10 C15orf41 homolog [Source:VGNC Symbol;Acc:VGNC:52611]	protein_coding	2.95225	10.9388
ENSBTAG00000018644	3.67132	8.55586e-05	3.10324	0.00037925	PDZRN3	PDZ domain containing ring finger 3 [Source:VGNC Symbol;Acc:VGNC:32731]	protein_coding	3.20316	12.2888
ENSBTAG00000014912	3.83247	3.12868e-07	3.36314	1.15084e-06	FMOD	fibromodulin [Source:VGNC Symbol;Acc:VGNC:29054]	protein_coding	10.1591	40.0209
ENSBTAG00000018142	4.01479	0.00339334	3.57098	0.0040984	DTL	denticleless E3 ubiquitin protein ligase homolog [Source:VGNC Symbol;Acc:VGNC:28230]	protein_coding	3.9791	15.91
ENSBTAG00000002258	4.05255	0.000164609	3.52188	0.000978052	APOA1	apolipoprotein A1 [Source:VGNC Symbol;Acc:VGNC:26022]	protein_coding	18.0878	72.9466
ENSBTAG00000032092	4.34898	7.84137e-05	3.72029	9.68527e-05	CDH11	Bos taurus cadherin 11 (CDH11), mRNA. [Source:RefSeq mRNA;Acc:NM_001081624]	protein_coding	10.0543	42.8004
ENSBTAG00000000240	4.84613	0.00131568	4.51116	0.00143423	AKAP7	Bos taurus A-kinase anchoring protein 7 (AKAP7), mRNA. [Source:RefSeq mRNA;Acc:NM_001102266]	protein_coding	3.64109	16.9688
ENSBTAG00000017863	4.8739	5.24192e-07	3.90055	0.000126245	SRGN	Bos taurus serglycin (SRGN), mRNA. [Source:RefSeq mRNA;Acc:NM_001025326]	protein_coding	438.527	2026.15
ENSBTAG00000021855	5.1629	0.0011115	4.00588	0.00447173	ANO3	anoctamin 3 [Source:VGNC Symbol;Acc:VGNC:25952]	protein_coding	2.56079	11.8953
ENSBTAG00000015441	5.40895	4.11171e-05	4.79646	2.99294e-05	ACTG2	actin, gamma 2, smooth muscle, enteric [Source:NCBI gene;Acc:281595]	protein_coding	7.71197	39.0241
ENSBTAG00000005244	6.98207	0.000102784	6.51294	0.000468046	RASL11A	RAS like family 11 member A [Source:VGNC Symbol;Acc:VGNC:33754]	protein_coding	1.22132	7.69553
ENSBTAG00000014402	9.77782	3.06545e-11	8.9121	1.89538e-10	GIMAP8	GTPase, IMAP family member 8 [Source:VGNC Symbol;Acc:VGNC:29357]	protein_coding	2.60792	22.9597

## Sheet: S4c_large_spont
Table S4c: Differentially abundant gene transcripts between large and spontaneous follicle cumulus cell pools.
Gene ID	edgeR analysis		DESeq2 analysis		external gene name	description	gene biotype	mean CPM large	mean CPM spontaneous
	fold change	nominal P value	fold change	nominal P value
ENSBTAG00000015415	-6.34791	0.00323434	-6.81012	0.000531243	UNC80	Bos taurus unc-80 homolog, NALCN channel complex subunit (UNC80), mRNA. [Source:RefSeq mRNA;Acc:NM_001206563]	protein_coding	12.6262	2.16814
ENSBTAG00000000873	-3.57883	0.00287587	-4.03742	0.000889992	SLC13A3	Bos taurus solute carrier family 13 member 3 (SLC13A3), mRNA. [Source:RefSeq mRNA;Acc:NM_001080288]	protein_coding	13.2222	3.52107
ENSBTAG00000000414	-2.0145	0.00909594	-2.41458	0.00511187	FUT6	fucosyltransferase 6 [Source:NCBI gene;Acc:338077]	protein_coding	4.6084	1.67745
ENSBTAG00000004799	-1.73876	0.00933631	-2.00102	0.00435487	DENND2A	DENN domain containing 2A [Source:VGNC Symbol;Acc:VGNC:27995]	protein_coding	22.7216	9.09495
ENSBTAG00000005950	-1.46094	0.00263102	-1.72294	0.00624812	GPR50	G protein-coupled receptor 50 [Source:VGNC Symbol;Acc:VGNC:29589]	protein_coding	478.755	206.93
ENSBTAG00000005858	-1.0558	0.00949149	-1.29398	0.00223109	KCNJ13	potassium voltage-gated channel subfamily J member 13 [Source:VGNC Symbol;Acc:VGNC:30456]	protein_coding	12.4727	6.07708
ENSBTAG00000016128	-0.970312	0.00443431	-1.19446	0.000463626	GGA3	golgi associated, gamma adaptin ear containing, ARF binding protein 3 [Source:VGNC Symbol;Acc:VGNC:29337]	protein_coding	15.334	7.71894
ENSBTAG00000015974	-0.888705	0.00241025	-1.08575	0.000196891	FLVCR1	feline leukemia virus subgroup C cellular receptor 1 [Source:NCBI gene;Acc:533317]	protein_coding	24.0872	12.512
ENSBTAG00000021048	-0.836769	0.000360167	-1.0294	2.95405e-06	ADM	Bos taurus adrenomedullin (ADM), mRNA. [Source:RefSeq mRNA;Acc:NM_173888]	protein_coding	741.879	393.224
ENSBTAG00000001652	-0.758072	0.00621929	-0.923106	0.000763336	SLCO3A1	Bos taurus solute carrier organic anion transporter family member 3A1 (SLCO3A1), mRNA. [Source:RefSeq mRNA;Acc:NM_001001134]	protein_coding	99.521	54.3781
ENSBTAG00000004997	-0.562211	0.00424738	-0.70705	0.000403237	CTNNAL1	Bos taurus catenin alpha like 1 (CTNNAL1), mRNA. [Source:RefSeq mRNA;Acc:NM_001191534]	protein_coding	52.1981	30.9924
ENSBTAG00000017626	-0.441277	0.0038613	-0.590465	6.59173e-05	GFPT1	Bos taurus glutamine--fructose-6-phosphate transaminase 1 (GFPT1), mRNA. [Source:RefSeq mRNA;Acc:NM_001109961]	protein_coding	90.1573	56.8776
ENSBTAG00000010760	0.297179	0.00559928	0.195866	0.00417954	REV3L	Bos taurus REV3 like, DNA directed polymerase zeta catalytic subunit (REV3L), mRNA. [Source:RefSeq mRNA;Acc:NM_001206172]	protein_coding	400.432	584.082
ENSBTAG00000013204	0.335016	0.00253249	0.230272	0.00325322	ATP13A3	ATPase 13A3 [Source:VGNC Symbol;Acc:VGNC:26279]	protein_coding	80.7285	120.524
ENSBTAG00000021543	0.38297	0.00530998	0.266551	0.00713271	MDFIC	Bos taurus MyoD family inhibitor domain containing (MDFIC), mRNA. [Source:RefSeq mRNA;Acc:NM_001101102]	protein_coding	206.561	317.102
ENSBTAG00000010587	0.416106	0.00382251	0.304203	0.00388513	SH3BGRL	Bos taurus SH3 domain binding glutamate rich protein like (SH3BGRL), mRNA. [Source:RefSeq mRNA;Acc:NM_001035440]	protein_coding	74.2642	116.324
ENSBTAG00000021323	0.429813	0.00059942	0.313222	0.00103317	AGFG1	Bos taurus ArfGAP with FG repeats 1 (AGFG1), mRNA. [Source:RefSeq mRNA;Acc:NM_001038171]	protein_coding	110.935	174.582
ENSBTAG00000003362	0.430888	0.00126872	0.308777	0.00848395	HSP90B1	Bos taurus heat shock protein 90 beta family member 1 (HSP90B1), mRNA. [Source:RefSeq mRNA;Acc:NM_174700]	protein_coding	2723.54	4289.8
ENSBTAG00000046160	0.435686	0.00867939	0.314458	0.00874402	SMIM13	Bos taurus small integral membrane protein 13 (SMIM13), mRNA. [Source:RefSeq mRNA;Acc:NM_001135578]	protein_coding	17.8298	28.2068
ENSBTAG00000017759	0.452587	0.00260426	0.322736	0.00287731	LOC515570	nodal modulator 1 [Source:NCBI gene;Acc:515570]	protein_coding	234.447	373.543
ENSBTAG00000010801	0.460259	0.00167351	0.338835	0.00512775	CMBL	Bos taurus carboxymethylenebutenolidase homolog (CMBL), mRNA. [Source:RefSeq mRNA;Acc:NM_001192983]	protein_coding	68.0684	108.918
ENSBTAG00000016818	0.467798	0.00416942	0.343759	0.00814815	ZCCHC17	Bos taurus zinc finger CCHC-type containing 17 (ZCCHC17), mRNA. [Source:RefSeq mRNA;Acc:NM_001034652]	protein_coding	49.1464	78.9111
ENSBTAG00000019542	0.476141	0.00201602	0.349047	0.00635305	MRPL39	mitochondrial ribosomal protein L39 [Source:VGNC Symbol;Acc:VGNC:31634]	protein_coding	39.411	63.7118
ENSBTAG00000031797	0.492513	0.00040997	0.36087	0.00440878	MANF	mesencephalic astrocyte derived neurotrophic factor [Source:VGNC Symbol;Acc:VGNC:31171]	protein_coding	73.6582	119.721
ENSBTAG00000015312	0.50497	0.00733454	0.368709	0.00862894	LTBR	lymphotoxin beta receptor [Source:VGNC Symbol;Acc:VGNC:31075]	protein_coding	18.6223	30.5034
ENSBTAG00000010221	0.524124	0.00524076	0.387757	0.00579701	CCDC93	Bos taurus coiled-coil domain containing 93 (CCDC93), mRNA. [Source:RefSeq mRNA;Acc:NM_001098468]	protein_coding	19.2847	31.9552
ENSBTAG00000002557	0.528077	0.00546152	0.401213	0.00550417	MRPL19	mitochondrial ribosomal protein L19 [Source:VGNC Symbol;Acc:VGNC:31622]	protein_coding	23.9055	39.6494
ENSBTAG00000022449	0.567269	0.00232442	0.43323	0.00477139	SCD5	Bos taurus stearoyl-CoA desaturase 5 (SCD5), mRNA. [Source:RefSeq mRNA;Acc:NM_001076945]	protein_coding	91.1034	153.483
ENSBTAG00000002020	0.581464	0.00476406	0.445751	0.00505028	CREBRF	CREB3 regulatory factor [Source:VGNC Symbol;Acc:VGNC:27700]	protein_coding	47.1612	79.9771
ENSBTAG00000048152	0.585537	0.000709921	0.441114	0.00211886	TUBG1	Bos taurus tubulin gamma 1 (TUBG1), mRNA. [Source:RefSeq mRNA;Acc:NM_001076255]	protein_coding	27.3278	46.4329
ENSBTAG00000003490	0.59674	0.00801369	0.450775	0.00787219	ELMO1	Bos taurus engulfment and cell motility 1 (ELMO1), transcript variant 2, mRNA. [Source:RefSeq mRNA;Acc:NM_001024505]	protein_coding	17.4155	29.7436
ENSBTAG00000018690	0.60309	0.00298779	0.471938	0.00185336	RPAP3	Bos taurus RNA polymerase II associated protein 3 (RPAP3), mRNA. [Source:RefSeq mRNA;Acc:NM_001101930]	protein_coding	44.2158	75.9555
ENSBTAG00000008109	0.6412	0.0014652	0.488714	0.00469835	TMEM97	Bos taurus transmembrane protein 97 (TMEM97), mRNA. [Source:RefSeq mRNA;Acc:NM_001034403]	protein_coding	17.393	30.1474
ENSBTAG00000021103	0.642392	0.000861621	0.50087	0.000708482	SLC35F5	Bos taurus solute carrier family 35 member F5 (SLC35F5), mRNA. [Source:RefSeq mRNA;Acc:NM_001101242]	protein_coding	53.7181	93.682
ENSBTAG00000004059	0.649393	0.000364411	0.505222	8.30847e-05	SOAT1	Bos taurus sterol O-acyltransferase 1 (SOAT1), mRNA. [Source:RefSeq mRNA;Acc:NM_001034206]	protein_coding	143.859	251.328
ENSBTAG00000008674	0.692744	0.00139757	0.54588	0.0021138	FAM136A	Bos taurus family with sequence similarity 136 member A (FAM136A), mRNA. [Source:RefSeq mRNA;Acc:NM_001046588]	protein_coding	28.8926	51.5814
ENSBTAG00000021499	0.733645	0.005314	0.571409	0.00713004	PSAP	prosaposin [Source:VGNC Symbol;Acc:VGNC:33431]	protein_coding	1099.86	1990.23
ENSBTAG00000027630	0.787247	0.00256634	0.627892	0.00263049	CISD2	CDGSH iron sulfur domain 2 [Source:VGNC Symbol;Acc:VGNC:27372]	protein_coding	17.1925	31.8176
ENSBTAG00000015254	0.814266	0.00520789	0.657964	0.00384796	GLB1	Bos taurus galactosidase beta 1 (GLB1), mRNA. [Source:RefSeq mRNA;Acc:NM_001035043]	protein_coding	30.6669	57.406
ENSBTAG00000015841	0.818154	0.00408413	0.645776	0.00905771	CCDC115	Bos taurus coiled-coil domain containing 115 (CCDC115), mRNA. [Source:RefSeq mRNA;Acc:NM_001034444]	protein_coding	8.06628	15.0781
ENSBTAG00000001509	0.928436	0.00412567	0.778569	0.00488645	ELK3	Bos taurus ELK3, ETS transcription factor (ELK3), mRNA. [Source:RefSeq mRNA;Acc:NM_001081542]	protein_coding	11.5597	22.7006
ENSBTAG00000002526	0.94886	0.00253529	0.776987	0.00360126	BDH2	Bos taurus 3-hydroxybutyrate dehydrogenase 2 (BDH2), mRNA. [Source:RefSeq mRNA;Acc:NM_001034488]	protein_coding	38.2979	75.4505
ENSBTAG00000015424	0.979594	0.00273385	0.817613	0.00280945	WDR12	Bos taurus WD repeat domain 12 (WDR12), mRNA. [Source:RefSeq mRNA;Acc:NM_001075907]	protein_coding	12.0761	24.0616
ENSBTAG00000012818	1.00254	0.00144108	0.822875	0.00111844	PDLIM5	PDZ and LIM domain 5 [Source:VGNC Symbol;Acc:VGNC:32711]	protein_coding	11.3298	22.6606
ENSBTAG00000007510	1.02199	0.00443616	0.846404	0.00663764	PXMP2	peroxisomal membrane protein 2 [Source:VGNC Symbol;Acc:VGNC:33584]	protein_coding	8.91897	18.1066
ENSBTAG00000013874	1.04705	0.000119778	0.861873	3.01826e-05	CFAP20	cilia and flagella associated protein 20 [Source:VGNC Symbol;Acc:VGNC:27240]	protein_coding	14.5042	29.6462
ENSBTAG00000018784	1.10502	0.00161656	0.924628	0.00286591	CTSZ	Bos taurus cathepsin Z (CTSZ), mRNA. [Source:RefSeq mRNA;Acc:NM_001077835]	protein_coding	17.7747	36.8204
ENSBTAG00000010579	1.25057	0.00418769	1.05724	0.00828532	ACADL	Bos taurus acyl-CoA dehydrogenase long chain (ACADL), mRNA. [Source:RefSeq mRNA;Acc:NM_001076936]	protein_coding	4.8293	10.4615
ENSBTAG00000003642	1.26924	0.00151437	1.07453	0.00106087	PRDX1	peroxiredoxin 1 [Source:VGNC Symbol;Acc:VGNC:33299]	protein_coding	621.149	1355.37
ENSBTAG00000005186	1.31	0.00541463	1.1049	0.00702687	DBNDD2	dysbindin domain containing 2 [Source:VGNC Symbol;Acc:VGNC:27892]	protein_coding	5.29889	11.7143
ENSBTAG00000000668	1.34687	0.000682638	1.11066	0.00247522	SLC22A5	Bos taurus solute carrier family 22 member 5 (SLC22A5), mRNA. [Source:RefSeq mRNA;Acc:NM_001046502]	protein_coding	51.2741	114.527
ENSBTAG00000004303	1.38619	7.38057e-05	1.14484	0.000305327	SLC27A2	solute carrier family 27 member 2 [Source:VGNC Symbol;Acc:VGNC:34786]	protein_coding	56.9	128.768
ENSBTAG00000002317	1.48978	0.00290039	1.2568	0.000979301	PTN	Bos taurus pleiotrophin (PTN), mRNA. [Source:RefSeq mRNA;Acc:NM_173955]	protein_coding	82.8285	193.015
ENSBTAG00000019368	1.54263	1.77081e-05	1.31397	0.000153447	IGFBP7	insulin like growth factor binding protein 7 [Source:VGNC Symbol;Acc:VGNC:30089]	protein_coding	256.655	606.305
ENSBTAG00000040323	1.55712	0.00162219	1.31402	0.00634623	LOC781977	Secreted and transmembrane 1-like [Source:NCBI gene;Acc:781977]	protein_coding	17.1069	40.7336
ENSBTAG00000046172	1.74363	0.00558105	1.50046	0.00921803	LOC100299281	Quinone oxidoreductase-like protein 2 [Source:UniProtKB/Swiss-Prot;Acc:A6QQF5]	protein_coding	9.91556	24.7993
ENSBTAG00000005691	1.75373	0.000996249	1.44321	0.0014209	FGF2	Bos taurus fibroblast growth factor 2 (FGF2), mRNA. [Source:RefSeq mRNA;Acc:NM_174056]	protein_coding	42.8048	106.991
ENSBTAG00000014913	1.79923	0.0020761	1.57122	0.00272609	SRD5A3	Bos taurus steroid 5 alpha-reductase 3 (SRD5A3), mRNA. [Source:RefSeq mRNA;Acc:NM_001206090]	protein_coding	4.13768	10.5356
ENSBTAG00000032183	1.90238	0.00612616	1.66358	0.00867501	NELL2	neural EGFL like 2 [Source:VGNC Symbol;Acc:VGNC:32003]	protein_coding	13.6668	35.693
ENSBTAG00000013706	1.9058	0.00502347	1.67868	0.00774389	MEGF9	multiple EGF like domains 9 [Source:VGNC Symbol;Acc:VGNC:31377]	protein_coding	5.68428	14.9512
ENSBTAG00000004772	1.97791	0.00127153	1.76821	0.00384289	THEM4	thioesterase superfamily member 4 [Source:VGNC Symbol;Acc:VGNC:35833]	protein_coding	2.2712	6.08378
ENSBTAG00000000133	2.08179	0.00115491	1.82513	0.00326142	CD68	CD68 molecule [Source:VGNC Symbol;Acc:VGNC:27042]	protein_coding	8.93315	24.4147
ENSBTAG00000015441	2.13442	0.00812401	1.8232	0.00902196	ACTG2	actin, gamma 2, smooth muscle, enteric [Source:NCBI gene;Acc:281595]	protein_coding	14.1845	39.0241
ENSBTAG00000032875	2.13558	0.00234815	1.85099	0.00713382	BEX2	Bos taurus brain expressed X-linked 2 (BEX2), mRNA. [Source:RefSeq mRNA;Acc:NM_001077034]	protein_coding	8.42879	23.3152
ENSBTAG00000022751	2.21621	0.00458023	1.99636	0.00907728	ZCWPW2	zinc finger CW-type and PWWP domain containing 2 [Source:HGNC Symbol;Acc:HGNC:23574]	protein_coding	2.4372	6.8645
ENSBTAG00000002914	2.381	0.000173746	2.09933	0.000585548	GALNT18	polypeptide N-acetylgalactosaminyltransferase 18 [Source:VGNC Symbol;Acc:VGNC:29230]	protein_coding	15.0814	43.7903
ENSBTAG00000002258	2.52724	0.00258285	2.23264	0.00841325	APOA1	apolipoprotein A1 [Source:VGNC Symbol;Acc:VGNC:26022]	protein_coding	24.2665	72.9466
ENSBTAG00000020202	2.59921	0.000888741	2.30223	0.00181337	CRHBP	Bos taurus corticotropin releasing hormone binding protein (CRHBP), mRNA. [Source:RefSeq mRNA;Acc:NM_001101202]	protein_coding	7.16177	21.927
ENSBTAG00000012925	2.77392	0.00294489	2.48885	0.00828598	NCAPH	Bos taurus non-SMC condensin I complex subunit H (NCAPH), mRNA. [Source:RefSeq mRNA;Acc:NM_001034213]	protein_coding	2.815	8.95081
ENSBTAG00000007651	2.8564	0.00117505	2.47292	0.00344903	TARSL2	Bos taurus threonyl-tRNA synthetase like 2 (TARSL2), mRNA. [Source:RefSeq mRNA;Acc:NM_001102089]	protein_coding	3.47418	10.9819
ENSBTAG00000003301	2.92717	0.00384908	2.54505	0.00763838	NCAM2	neural cell adhesion molecule 2 [Source:VGNC Symbol;Acc:VGNC:31899]	protein_coding	4.0173	13.2245
ENSBTAG00000009639	2.94047	2.45129e-05	2.56029	0.000170072	SMPD3	Bos taurus sphingomyelin phosphodiesterase 3 (SMPD3), mRNA. [Source:RefSeq mRNA;Acc:NM_001192363]	protein_coding	6.35409	20.7002
ENSBTAG00000011133	3.11684	0.00126342	2.85784	0.00193063	AP1S3	Bos taurus adaptor related protein complex 1 subunit sigma 3 (AP1S3), mRNA. [Source:RefSeq mRNA;Acc:NM_001103296]	protein_coding	2.82695	9.7909
ENSBTAG00000005244	3.50456	0.00388261	3.24572	0.00986495	RASL11A	RAS like family 11 member A [Source:VGNC Symbol;Acc:VGNC:33754]	protein_coding	2.11319	7.69553
ENSBTAG00000009396	3.88978	0.00170392	3.57913	0.00581629	EXO1	Bos taurus exonuclease 1 (EXO1), mRNA. [Source:RefSeq mRNA;Acc:NM_001304987]	protein_coding	2.18161	8.64814
ENSBTAG00000008541	4.21802	0.0022021	4.01036	0.00197851	MGST1	microsomal glutathione S-transferase 1 [Source:VGNC Symbol;Acc:VGNC:31451]	protein_coding	2.99657	12.5387
ENSBTAG00000031998	5.18541	1.5225e-06	4.90071	7.18513e-06	CXCL16	C-X-C motif chemokine ligand 16 [Source:VGNC Symbol;Acc:VGNC:27851]	protein_coding	2.68952	13.3473
ENSBTAG00000000240	6.55474	0.000223446	6.06582	0.000219622	AKAP7	Bos taurus A-kinase anchoring protein 7 (AKAP7), mRNA. [Source:RefSeq mRNA;Acc:NM_001102266]	protein_coding	2.86548	16.9688
ENSBTAG00000005260	10.7255	0.00577696	10.2701	0.00493479	SPP1	secreted phosphoprotein 1 [Source:VGNC Symbol;Acc:VGNC:35232]	protein_coding	9.70498	93.9324
ENSBTAG00000015844	11.9546	0.000120862	11.5854	0.000489924	TFPI2	tissue factor pathway inhibitor 2 [Source:VGNC Symbol;Acc:VGNC:35794]	protein_coding	1.52181	17.1449
