# Supplementary material for: Differential Transcript Profiles in Cumulus-Oocyte Complexes Originating from Pre-Ovulatory Follicles of Varied Physiological Maturity in Beef Cows
Source: Genes (Basel). 2021 Jun 10;12(6):893. doi: 10.3390/genes12060893 (PMC8227736; doi:10.3390/genes12060893)
Supplement: Supplementary file 1 [file genes-12-00893-s001.zip › Table_S5.xlsx]

## Sheet: S5a_small_large
Table S5a: Pathways and gene ontologies enriched in the gene transcripts that were differentially abundant between small and large follicle cumulus cell pools.
database	entry	term	pathway_or_ontology	number_DEG_in_entry	p_value	FDR	ensembl_gene_id	gene_name	gene_regulation_small_vs_large
DAVID	map00010	Glycolysis/Gluconeogenesis	KEGG	6	8e-05	0.0063	ENSBTAG00000013099	aldolase, fructose-bisphosphate C (ALDOC)	DOWN
DAVID	map00010	Glycolysis/Gluconeogenesis	KEGG	6	8e-05	0.0063	ENSBTAG00000006396	glucose-6-phosphate isomerase (GPI)	DOWN
DAVID	map00010	Glycolysis/Gluconeogenesis	KEGG	6	8e-05	0.0063	ENSBTAG00000013108	hexokinase 2 (HK2)	DOWN
DAVID	map00010	Glycolysis/Gluconeogenesis	KEGG	6	8e-05	0.0063	ENSBTAG00000008683	lactate dehydrogenase A (LDHA)	DOWN
DAVID	map00010	Glycolysis/Gluconeogenesis	KEGG	6	8e-05	0.0063	ENSBTAG00000002683	phosphofructokinase, platelet (PFKP)	DOWN
DAVID	map00010	Glycolysis/Gluconeogenesis	KEGG	6	8e-05	0.0063	ENSBTAG00000019782	triosephosphate isomerase 1 (TPI1)	DOWN
DAVID	map01200	Carbon metabolism	KEGG	6	0.001	0.034	ENSBTAG00000013099	aldolase, fructose-bisphosphate C (ALDOC)	DOWN
DAVID	map01200	Carbon metabolism	KEGG	6	0.001	0.034	ENSBTAG00000006396	glucose-6-phosphate isomerase (GPI)	DOWN
DAVID	map01200	Carbon metabolism	KEGG	6	0.001	0.034	ENSBTAG00000013108	hexokinase 2 (HK2)	DOWN
DAVID	map01200	Carbon metabolism	KEGG	6	0.001	0.034	ENSBTAG00000002683	phosphofructokinase, platelet (PFKP)	DOWN
DAVID	map01200	Carbon metabolism	KEGG	6	0.001	0.034	ENSBTAG00000031500	serine hydroxymethyltransferase 2 (SHMT2)	DOWN
DAVID	map01200	Carbon metabolism	KEGG	6	0.001	0.034	ENSBTAG00000019782	triosephosphate isomerase 1 (TPI1)	DOWN
DAVID	map00051	Fructose and mannose metabolism	KEGG	4	0.0013	0.036	ENSBTAG00000013099	aldolase, fructose-bisphosphate C (ALDOC)	DOWN
DAVID	map00051	Fructose and mannose metabolism	KEGG	4	0.0013	0.036	ENSBTAG00000013108	hexokinase 2 (HK2)	DOWN
DAVID	map00051	Fructose and mannose metabolism	KEGG	4	0.0013	0.036	ENSBTAG00000002683	phosphofructokinase, platelet (PFKP)	DOWN
DAVID	map00051	Fructose and mannose metabolism	KEGG	4	0.0013	0.036	ENSBTAG00000019782	triosephosphate isomerase 1 (TPI1)	DOWN
GO	GO:0006757	ATP generation from ADP	GO_biological_process_complete	5	7.04e-06	0.0139	ENSBTAG00000019782	triosephosphate isomerase 1 (TPI1)	DOWN
GO	GO:0006757	ATP generation from ADP	GO_biological_process_complete	5	7.04e-06	0.0139	ENSBTAG00000013099	aldolase, fructose-bisphosphate C (ALDOC)	DOWN
GO	GO:0006757	ATP generation from ADP	GO_biological_process_complete	5	7.04e-06	0.0139	ENSBTAG00000002683	phosphofructokinase, platelet (PFKP)	DOWN
GO	GO:0006757	ATP generation from ADP	GO_biological_process_complete	5	7.04e-06	0.0139	ENSBTAG00000013108	hexokinase 2 (HK2)	DOWN
GO	GO:0006757	ATP generation from ADP	GO_biological_process_complete	5	7.04e-06	0.0139	ENSBTAG00000006396	glucose-6-phosphate isomerase (GPI)	DOWN
GO	GO:0006096	glycolytic process	GO_biological_process_complete	5	7.04e-06	0.0122	ENSBTAG00000019782	triosephosphate isomerase 1 (TPI1)	DOWN
GO	GO:0006096	glycolytic process	GO_biological_process_complete	5	7.04e-06	0.0122	ENSBTAG00000013099	aldolase, fructose-bisphosphate C (ALDOC)	DOWN
GO	GO:0006096	glycolytic process	GO_biological_process_complete	5	7.04e-06	0.0122	ENSBTAG00000002683	phosphofructokinase, platelet (PFKP)	DOWN
GO	GO:0006096	glycolytic process	GO_biological_process_complete	5	7.04e-06	0.0122	ENSBTAG00000013108	hexokinase 2 (HK2)	DOWN
GO	GO:0006096	glycolytic process	GO_biological_process_complete	5	7.04e-06	0.0122	ENSBTAG00000006396	glucose-6-phosphate isomerase (GPI)	DOWN
GO	GO:0046031	ADP metabolic process	GO_biological_process_complete	6	9.7e-07	0.0134	ENSBTAG00000019782	triosephosphate isomerase 1 (TPI1)	DOWN
GO	GO:0046031	ADP metabolic process	GO_biological_process_complete	6	9.7e-07	0.0134	ENSBTAG00000013099	aldolase, fructose-bisphosphate C (ALDOC)	DOWN
GO	GO:0046031	ADP metabolic process	GO_biological_process_complete	6	9.7e-07	0.0134	ENSBTAG00000002683	phosphofructokinase, platelet (PFKP)	DOWN
GO	GO:0046031	ADP metabolic process	GO_biological_process_complete	6	9.7e-07	0.0134	ENSBTAG00000013108	hexokinase 2 (HK2)	DOWN
GO	GO:0046031	ADP metabolic process	GO_biological_process_complete	6	9.7e-07	0.0134	ENSBTAG00000006396	glucose-6-phosphate isomerase (GPI)	DOWN
GO	GO:0046031	ADP metabolic process	GO_biological_process_complete	6	9.7e-07	0.0134	ENSBTAG00000030674	adenylate kinase 4 (AK4)	DOWN
GO	GO:0009179	purine ribonucleoside diphosphate metabolic process	GO_biological_process_complete	6	1.92e-06	0.0133	ENSBTAG00000019782	triosephosphate isomerase 1 (TPI1)	DOWN
GO	GO:0009179	purine ribonucleoside diphosphate metabolic process	GO_biological_process_complete	6	1.92e-06	0.0133	ENSBTAG00000013099	aldolase, fructose-bisphosphate C (ALDOC)	DOWN
GO	GO:0009179	purine ribonucleoside diphosphate metabolic process	GO_biological_process_complete	6	1.92e-06	0.0133	ENSBTAG00000002683	phosphofructokinase, platelet (PFKP)	DOWN
GO	GO:0009179	purine ribonucleoside diphosphate metabolic process	GO_biological_process_complete	6	1.92e-06	0.0133	ENSBTAG00000013108	hexokinase 2 (HK2)	DOWN
GO	GO:0009179	purine ribonucleoside diphosphate metabolic process	GO_biological_process_complete	6	1.92e-06	0.0133	ENSBTAG00000006396	glucose-6-phosphate isomerase (GPI)	DOWN
GO	GO:0009179	purine ribonucleoside diphosphate metabolic process	GO_biological_process_complete	6	1.92e-06	0.0133	ENSBTAG00000030674	adenylate kinase 4 (AK4)	DOWN
GO	GO:0009135	purine nucleoside diphosphate metabolic process	GO_biological_process_complete	6	1.92e-06	0.00887	ENSBTAG00000019782	triosephosphate isomerase 1 (TPI1)	DOWN
GO	GO:0009135	purine nucleoside diphosphate metabolic process	GO_biological_process_complete	6	1.92e-06	0.00887	ENSBTAG00000013099	aldolase, fructose-bisphosphate C (ALDOC)	DOWN
GO	GO:0009135	purine nucleoside diphosphate metabolic process	GO_biological_process_complete	6	1.92e-06	0.00887	ENSBTAG00000002683	phosphofructokinase, platelet (PFKP)	DOWN
GO	GO:0009135	purine nucleoside diphosphate metabolic process	GO_biological_process_complete	6	1.92e-06	0.00887	ENSBTAG00000013108	hexokinase 2 (HK2)	DOWN
GO	GO:0009135	purine nucleoside diphosphate metabolic process	GO_biological_process_complete	6	1.92e-06	0.00887	ENSBTAG00000006396	glucose-6-phosphate isomerase (GPI)	DOWN
GO	GO:0009135	purine nucleoside diphosphate metabolic process	GO_biological_process_complete	6	1.92e-06	0.00887	ENSBTAG00000030674	adenylate kinase 4 (AK4)	DOWN
GO	GO:0009185	ribonucleoside diphosphate metabolic process	GO_biological_process_complete	6	3.14e-06	0.0109	ENSBTAG00000019782	triosephosphate isomerase 1 (TPI1)	DOWN
GO	GO:0009185	ribonucleoside diphosphate metabolic process	GO_biological_process_complete	6	3.14e-06	0.0109	ENSBTAG00000013099	aldolase, fructose-bisphosphate C (ALDOC)	DOWN
GO	GO:0009185	ribonucleoside diphosphate metabolic process	GO_biological_process_complete	6	3.14e-06	0.0109	ENSBTAG00000002683	phosphofructokinase, platelet (PFKP)	DOWN
GO	GO:0009185	ribonucleoside diphosphate metabolic process	GO_biological_process_complete	6	3.14e-06	0.0109	ENSBTAG00000013108	hexokinase 2 (HK2)	DOWN
GO	GO:0009185	ribonucleoside diphosphate metabolic process	GO_biological_process_complete	6	3.14e-06	0.0109	ENSBTAG00000006396	glucose-6-phosphate isomerase (GPI)	DOWN
GO	GO:0009185	ribonucleoside diphosphate metabolic process	GO_biological_process_complete	6	3.14e-06	0.0109	ENSBTAG00000030674	adenylate kinase 4 (AK4)	DOWN
GO	GO:0006165	nucleoside diphosphate phosphorylation	GO_biological_process_complete	6	3.53e-06	0.00976	ENSBTAG00000019782	triosephosphate isomerase 1 (TPI1)	DOWN
GO	GO:0006165	nucleoside diphosphate phosphorylation	GO_biological_process_complete	6	3.53e-06	0.00976	ENSBTAG00000013099	aldolase, fructose-bisphosphate C (ALDOC)	DOWN
GO	GO:0006165	nucleoside diphosphate phosphorylation	GO_biological_process_complete	6	3.53e-06	0.00976	ENSBTAG00000002683	phosphofructokinase, platelet (PFKP)	DOWN
GO	GO:0006165	nucleoside diphosphate phosphorylation	GO_biological_process_complete	6	3.53e-06	0.00976	ENSBTAG00000013108	hexokinase 2 (HK2)	DOWN
GO	GO:0006165	nucleoside diphosphate phosphorylation	GO_biological_process_complete	6	3.53e-06	0.00976	ENSBTAG00000006396	glucose-6-phosphate isomerase (GPI)	DOWN
GO	GO:0006165	nucleoside diphosphate phosphorylation	GO_biological_process_complete	6	3.53e-06	0.00976	ENSBTAG00000030674	adenylate kinase 4 (AK4)	DOWN
GO	GO:0046939	nucleotide phosphorylation	GO_biological_process_complete	6	3.95e-06	0.00912	ENSBTAG00000019782	triosephosphate isomerase 1 (TPI1)	DOWN
GO	GO:0046939	nucleotide phosphorylation	GO_biological_process_complete	6	3.95e-06	0.00912	ENSBTAG00000013099	aldolase, fructose-bisphosphate C (ALDOC)	DOWN
GO	GO:0046939	nucleotide phosphorylation	GO_biological_process_complete	6	3.95e-06	0.00912	ENSBTAG00000002683	phosphofructokinase, platelet (PFKP)	DOWN
GO	GO:0046939	nucleotide phosphorylation	GO_biological_process_complete	6	3.95e-06	0.00912	ENSBTAG00000013108	hexokinase 2 (HK2)	DOWN
GO	GO:0046939	nucleotide phosphorylation	GO_biological_process_complete	6	3.95e-06	0.00912	ENSBTAG00000006396	glucose-6-phosphate isomerase (GPI)	DOWN
GO	GO:0046939	nucleotide phosphorylation	GO_biological_process_complete	6	3.95e-06	0.00912	ENSBTAG00000030674	adenylate kinase 4 (AK4)	DOWN
GO	GO:0009132	nucleoside diphosphate metabolic process	GO_biological_process_complete	6	1.86e-05	0.0286	ENSBTAG00000019782	triosephosphate isomerase 1 (TPI1)	DOWN
GO	GO:0009132	nucleoside diphosphate metabolic process	GO_biological_process_complete	6	1.86e-05	0.0286	ENSBTAG00000013099	aldolase, fructose-bisphosphate C (ALDOC)	DOWN
GO	GO:0009132	nucleoside diphosphate metabolic process	GO_biological_process_complete	6	1.86e-05	0.0286	ENSBTAG00000002683	phosphofructokinase, platelet (PFKP)	DOWN
GO	GO:0009132	nucleoside diphosphate metabolic process	GO_biological_process_complete	6	1.86e-05	0.0286	ENSBTAG00000013108	hexokinase 2 (HK2)	DOWN
GO	GO:0009132	nucleoside diphosphate metabolic process	GO_biological_process_complete	6	1.86e-05	0.0286	ENSBTAG00000006396	glucose-6-phosphate isomerase (GPI)	DOWN
GO	GO:0009132	nucleoside diphosphate metabolic process	GO_biological_process_complete	6	1.86e-05	0.0286	ENSBTAG00000030674	adenylate kinase 4 (AK4)	DOWN
GO	P00024	Glycolysis	PANTHER_pathways	4	1.72e-05	0.00285	ENSBTAG00000019782	triosephosphate isomerase 1 (TPI1)	DOWN
GO	P00024	Glycolysis	PANTHER_pathways	4	1.72e-05	0.00285	ENSBTAG00000013099	aldolase, fructose-bisphosphate C (ALDOC)	DOWN
GO	P00024	Glycolysis	PANTHER_pathways	4	1.72e-05	0.00285	ENSBTAG00000013108	hexokinase 2 (HK2)	DOWN
GO	P00024	Glycolysis	PANTHER_pathways	4	1.72e-05	0.00285	ENSBTAG00000006396	glucose-6-phosphate isomerase (GPI)	DOWN

## Sheet: S5b_large_spont
Table S5b: Pathways and gene ontologies enriched in the gene transcripts that were differentially abundant between large and spontaneous follicle cumulus cell pools.
database	entry	term	pathway_or_ontology	number_DEG_in_entry	p_value	Benjamini	ensembl_gene_id	gene_name	gene_regulation_large_vs_spontaneous
DAVID		Lysosome	KEGG	6	0.00034	0.022	ENSBTAG00000000133	CD68 molecule(CD68)	DOWN
							ENSBTAG00000011133	adaptor related protein complex 1 sigma 3 subunit(AP1S3)	DOWN
							ENSBTAG00000018784	cathepsin Z(CTSZ)	DOWN
							ENSBTAG00000015254	galactosidase beta 1(GLB1)	DOWN
							ENSBTAG00000016128	golgi associated, gamma adaptin ear containing, ARF binding protein 3(GGA3)	UP
							ENSBTAG00000021499	prosaposin(PSAP)	DOWN
